# Supplementary material
Source: Research Square preprint supplement (doi:10.21203/rs.3.rs-9902298/v1)
Supplement: Supplementary file 1 [file 7f64a6738e512e29aca3b051.docx]

Supplementary Table S4: Strongest Gradient
