# Supplementary material
Source: Research Square preprint supplement (doi:10.21203/rs.3.rs-9902298/v1)
Supplement: Supplementary file 1 [file 597fade708eebc8ed65a32fc.xlsx]

## Sheet: Summary
Classified DEGs — Normalized Counts (716 genes, median-filtered)
Category	Label	Gene Count	Note
1_Strict_Shared_Up	Strict Shared Up	244	Sheet: Strict Shared Up
2_Fructose_Specific_Up	Fructose Specific Up	116	Sheet: Fructose Specific Up
0a_Fructose_Enhanced	Fructose Enhanced	57	Sheet: Fructose Enhanced
6_Fat_Specific_Up	Fat Specific Up	26	Sheet: Fat Specific Up
0b_Fructose_Suppressed	Fructose Suppressed	6	Sheet: Fructose Suppressed
3_Strict_Shared_Down	Strict Shared Down	156	Sheet: Strict Shared Down
4_Fat_Specific_Down	Fat Specific Down	18	Sheet: Fat Specific Down
5_Fructose_Specific_Down	Fructose Specific Down	93	Sheet: Fructose Specific Down
0c_Fructose_Reversed	Fructose Reversed	0	Sheet: Fructose Reversed
	TOTAL	716

## Sheet: Strict Shared Up
Strict Shared Up (n = 244) — Normalized Counts
		CD			HFD					HFSD					Group Medians
Gene	Category	CD4047tr	CD4008tr	CD4006tr	HFD4052tr	HFD4019tr	HFD4048tr	HFD4049tr	HFD4020tr	HFSD4053tr	HFSD4039tr	HFSD4038tr	HFSD4035tr	HFSD4044tr	CD_median	HFD_median	HFSD_median
Gm28661	1_Strict_Shared_Up	0	0	0	2751.62	540.62	765.41	123.49	3892.3	396.46	573.42	2109.25	5449.17	327.88	0	765.41	573.42
Gm63949	1_Strict_Shared_Up	0	0	0	0	101.53	87.06	0	108.97	98.07	48.62	38.21	0	81.26	0	87.06	48.62
Cyp2b13	1_Strict_Shared_Up	0	0	3.44	277.03	150.96	13.32	172	306.02	225.06	267.82	64.17	301.3	363.36	0	172	267.82
Gm2007	1_Strict_Shared_Up	0	0	0	12.16	0	85.38	0	23.67	55.6	23.61	16.02	26.68	36.44	0	12.16	26.68
Sptlc3	1_Strict_Shared_Up	0	0.78	0	9.44	29.73	10.34	5.37	66.92	8.46	19.18	2.33	83.48	31.29	0	10.34	19.18
B430212C06Rik	1_Strict_Shared_Up	5.91	1.85	1.66	28.47	36.92	230.79	105.17	94.61	165.83	96	80.39	105.97	122.43	1.85	94.61	105.97
Mas1	1_Strict_Shared_Up	0	0	0	1.78	20.47	5.56	15.28	19.96	9.7	5.48	6.02	9.35	18.78	0	15.28	9.35
Cidea	1_Strict_Shared_Up	97.44	3.07	2.75	504.82	322.31	2941.86	878.41	1034.12	1262.53	1020.27	1929.06	1358.28	1523.52	3.07	878.41	1358.28
Cfd	1_Strict_Shared_Up	68.98	9.74	32.8	807.39	426.23	1461.83	1268.16	2984.14	964.07	2055.26	1503.22	852.46	1159.13	32.8	1268.16	1159.13
Ucp3	1_Strict_Shared_Up	0	0	0.65	7.57	10.6	25.51	20.12	11.13	17.65	7.74	8.91	20.46	20.24	0	11.13	17.65
Gm37844	1_Strict_Shared_Up	0	0	0.69	4.04	6.76	19.6	15.85	11.83	19.45	3.37	13.77	13.76	13.09	0	11.83	13.76
Gm37795	1_Strict_Shared_Up	0	2.3	2.06	58.59	36.05	54.87	54.64	31.55	62.51	44.53	62.68	35.81	43.38	2.06	54.64	44.53
Gm19744	1_Strict_Shared_Up	0	0	0.83	12.28	5.47	18.46	20.11	3.11	26.12	3.04	2.53	4.23	14.23	0	12.28	4.23
Gm36161	1_Strict_Shared_Up	2.62	0.6	0.45	24.16	4.47	21.41	21.66	12.59	15.82	6.26	11.61	2.69	34.24	0.6	21.41	11.61
Chi3l1	1_Strict_Shared_Up	3.14	0	0.66	13.59	6.49	9.5	6.77	10.63	12.31	8.77	9.97	12.42	14.68	0.66	9.5	12.31
Gm13067	1_Strict_Shared_Up	0	1.12	1.5	16.82	8.66	22.88	30.11	13.73	16.57	13.82	30.6	18.49	12.02	1.12	16.82	16.57
Sdcbp2	1_Strict_Shared_Up	3.36	0	4.81	14.17	4.51	57.98	28.27	32.34	43.78	21.59	42.75	21.15	60.53	3.36	28.27	42.75
Gm45941	1_Strict_Shared_Up	11.54	3.65	3.15	137.18	26.73	156.75	134.42	38.64	105.99	76.8	86.09	22.54	64.05	3.65	134.42	76.8
Atp8b5	1_Strict_Shared_Up	12.26	8.08	9.43	177.64	67.62	171.87	176.74	118.36	138.82	139.95	160.73	109.94	141.48	9.43	171.87	139.95
Orm3	1_Strict_Shared_Up	20.11	22.29	37.06	496.27	96.94	210.4	225.48	273.71	357.89	440.7	226.65	329.22	460.18	22.29	225.48	357.89
Eda2r	1_Strict_Shared_Up	31.05	21.49	24.98	406.45	308.82	291.51	319.13	279.06	300.48	349.37	399.86	243.59	248.66	24.98	308.82	300.48
Gm53846	1_Strict_Shared_Up	0	1.15	1.03	7.65	5.88	27.69	10.92	7.35	12.89	2.75	27.61	10.52	8.46	1.03	7.65	10.52
Ccr1	1_Strict_Shared_Up	0	0.77	1.38	38.38	4.51	12.54	6.17	5.52	11.81	14.85	13.76	9.18	10.33	0.77	6.17	11.81
Mmp12	1_Strict_Shared_Up	27.2	13.46	11.62	176.68	50.99	443.44	100.49	124.48	287.19	98.26	104.37	161.27	316.95	13.46	124.48	161.27
Adam11	1_Strict_Shared_Up	12.11	69.9	43.14	606.93	551.31	305.91	503.41	520.72	510.14	584.64	338.71	394.66	581.7	43.14	520.72	510.14
Phlda3	1_Strict_Shared_Up	13.23	14.34	16.22	203.02	99.71	172.53	206.45	113.23	173.06	139.33	174.56	107.08	150.12	14.34	172.53	150.12
Ccl2	1_Strict_Shared_Up	6.97	2.39	2.47	27.45	9.37	39.42	15.67	24.23	26.36	18.2	27.68	27.8	43.51	2.47	24.23	27.68
Ankrd40cl	1_Strict_Shared_Up	12.84	2.94	6.28	47.52	47.5	43.77	49.92	61.25	48.1	52.92	43.71	66.77	54.52	6.28	47.52	52.92
Cidec	1_Strict_Shared_Up	368.93	129.74	92.42	1063.18	834.18	1635.88	1292.5	2172.92	1634.93	1729.73	1890.06	1711.82	1936.58	129.74	1292.5	1729.73
Gm19619	1_Strict_Shared_Up	96.22	41.05	30.9	365.91	370.34	613.28	592.88	432.81	613.27	385.67	384.69	417.53	524.84	41.05	432.81	417.53
Gm10851	1_Strict_Shared_Up	0	1.53	2.06	10.11	11.27	25.07	3.53	18.93	20.14	8.09	8.4	22.05	12.38	1.53	11.27	12.38
Gm34333	1_Strict_Shared_Up	7.9	0.91	0.75	12	11.12	31.77	19.72	5.18	15.59	3.79	33.12	8.24	14.3	0.91	12	14.3
Hao2	1_Strict_Shared_Up	6.73	1.53	3.44	30.33	63.1	3.92	18.52	40.23	18.76	29.69	12.99	27.56	53.7	3.44	30.33	27.56
Ephb2	1_Strict_Shared_Up	29.39	2.14	4.52	13.06	19.07	63.53	17.18	19.02	53.94	8.07	50.2	29.5	45.26	4.52	19.02	45.26
Ddias	1_Strict_Shared_Up	21.6	8.61	23.74	167.75	108.39	102.41	129.82	92.15	158.99	131.76	171.25	91.48	136.51	21.6	108.39	136.51
Themis	1_Strict_Shared_Up	323.66	9.8	24.78	504.53	517.2	1077.22	1128.02	679.08	1120.38	520.54	782.04	1142.5	1230.82	24.78	679.08	1120.38
Cxcl2	1_Strict_Shared_Up	0	0.94	2.55	6.94	12.58	8.29	10.08	12.08	10.84	5.58	9.7	13.35	18.68	0.94	10.08	10.84
Slfn1	1_Strict_Shared_Up	0	3.07	0	30.33	2.25	14.89	11.47	7.89	17.36	4.05	11.46	5.51	14.45	0	11.47	11.46
Mmp13	1_Strict_Shared_Up	3.37	0.77	2.06	8.08	2.25	25.09	6.17	8.68	15.98	3.37	14.53	13.77	22.04	2.06	8.08	14.53
Gm33447	1_Strict_Shared_Up	6.67	1.53	3.41	8.06	13.43	20.99	20.21	17.58	33.92	10.79	21.46	20.08	31.49	3.41	17.58	21.46
Gm36615	1_Strict_Shared_Up	63.93	19.06	13.59	311.75	113.44	295.55	193.82	230.57	197.31	178.07	206.24	177.99	161.98	19.06	230.57	178.07
Fam83f	1_Strict_Shared_Up	30.33	12.28	17.2	84.84	54.08	172.5	129.51	64.68	128.52	151.18	68.06	107.4	136.39	17.2	84.84	128.52
Fndc10	1_Strict_Shared_Up	6.74	3.84	4.81	12.13	18.03	38.41	22.93	20.51	29.87	14.84	27.51	35.82	46.13	4.81	20.51	29.87
Smpd3	1_Strict_Shared_Up	20.32	51.2	46.02	205.07	107.33	387.45	229.63	112.5	384.15	110.91	240.82	261.22	287.87	46.02	205.07	261.22
Grip1	1_Strict_Shared_Up	7.73	0	3.79	8.76	9.78	38.13	15.51	9.55	21.61	8.98	20.82	16.63	20.36	3.79	9.78	20.36
Fgf9	1_Strict_Shared_Up	3.91	4.1	2.32	4.68	9.16	14.86	29.02	16.6	20.26	26.89	30.27	19.5	10.16	3.91	14.86	20.26
Orm2	1_Strict_Shared_Up	113.97	57.64	73.43	740.31	169.08	365.27	276.95	334.44	479.51	406.34	386.37	530.25	668.68	73.43	334.44	479.51
Gm52350	1_Strict_Shared_Up	11.22	4.76	3.34	7.2	29.45	24.05	25.67	24.15	26.23	39.9	16.93	31.25	42.63	4.76	24.15	31.25
Slc13a4	1_Strict_Shared_Up	17.18	1.3	1.97	17.16	5.74	59.04	23.73	14.07	46.92	19.03	28.6	23.29	37.37	1.97	17.16	28.6
Gm4735	1_Strict_Shared_Up	0	9.21	0	0	51.83	24.28	39.76	17.35	25.71	25.63	16.79	24.83	17.88	0	24.28	24.83
Psd4	1_Strict_Shared_Up	44.48	28.17	26.1	80.12	159.9	235.68	218.36	197.81	228.47	152	130.17	208.3	222.84	28.17	197.81	208.3
Gm38956	1_Strict_Shared_Up	16.67	5.63	6.49	35.46	38.23	58.83	64.79	42.02	63.87	32.02	43.03	32.83	52.92	6.49	42.02	43.03
Gm45425	1_Strict_Shared_Up	32.78	35.14	29.1	209.33	146.95	168.8	186.46	176.85	212.81	194.12	209.11	185.1	159.18	32.78	176.85	194.12
Gm50314	1_Strict_Shared_Up	3.36	1.54	1.37	8.1	13.52	5.48	14.13	16.57	7.64	6.75	11.45	11.95	12.38	1.54	13.52	11.45
Gm70521	1_Strict_Shared_Up	10.75	3.31	4.34	28.37	30.59	42.93	42.42	15.77	33.16	19.25	32.47	24.16	31.35	4.34	30.59	31.35
Ddit4l	1_Strict_Shared_Up	9.48	8.64	7.74	64.25	15.85	23.72	50.99	64.69	42.01	50.53	50.96	21.32	85.16	8.64	50.99	50.53
Gm16006	1_Strict_Shared_Up	0	2.31	2.06	10.18	13.52	8.59	14.22	4.73	15.28	6.06	12.9	7.38	14.37	2.06	10.18	12.9
Gm56957	1_Strict_Shared_Up	2.93	0	6.38	24.79	9.82	20.2	21.53	9.18	16.56	12.93	21.03	12.01	29.11	2.93	20.2	16.56
Grin3b	1_Strict_Shared_Up	0	1.12	3.2	22.22	20.02	17	8.36	7.49	9.64	6.32	6.7	12.88	13.59	1.12	17	9.64
Gm44507	1_Strict_Shared_Up	19.07	28.35	36.93	155.44	154.05	268.54	95.33	161.95	218.57	249.3	99.13	148.29	134.14	28.35	155.44	148.29
Gm60916	1_Strict_Shared_Up	8.97	3.19	8.37	10.96	54.87	19.97	57.64	18.88	45.8	36.86	12.76	43.09	37.68	8.37	19.97	37.68
Gm45187	1_Strict_Shared_Up	6.8	5.42	6.04	43.84	25.02	33.08	18.68	24.49	23.7	22.35	29.92	51.36	34.62	6.04	25.02	29.92
Gm70669	1_Strict_Shared_Up	3.35	0	3.43	10.19	6.77	10.16	6.23	13.41	10.43	8.09	10.64	10.16	14.39	3.35	10.16	10.43
ENSMUSG00000128948	1_Strict_Shared_Up	16.1	1.55	2.84	14.16	20.22	22.06	18.15	11.87	19.4	23.32	20.35	22.91	25.5	2.84	18.15	22.91
Gria3	1_Strict_Shared_Up	10.99	18.8	23.7	95.82	30.28	168.12	123.38	93.3	155.78	72.67	104.6	83.96	113.4	18.8	95.82	104.6
Gm47790	1_Strict_Shared_Up	23.05	8.27	3	30.95	39.08	56.16	70.49	42.13	47.75	24.96	61.77	36.97	52.78	8.27	42.13	47.75
Sema5b	1_Strict_Shared_Up	101.46	61.74	50.91	192.74	415.09	215.59	307.49	382.24	269.47	362	326.03	413.76	451.16	61.74	307.49	362
Gm65993	1_Strict_Shared_Up	6.68	6.08	4.54	25.7	58.86	19.19	9.3	18.44	45.33	25.86	29.12	24.21	24.23	6.08	19.19	25.86
Slc22a29	1_Strict_Shared_Up	27.12	6.79	16.14	88.59	65.48	28.43	71.4	47.52	52.02	89.77	78.76	76.62	76.11	16.14	65.48	76.62
Ctse	1_Strict_Shared_Up	16.84	3.07	6.88	30.32	20.28	22.73	29.1	33.13	27.09	37.79	34.39	31.23	43.37	6.88	29.1	34.39
Acot11	1_Strict_Shared_Up	159.14	76.35	77.79	457.34	357.01	612.47	474.82	481.6	668.63	584.67	356.62	443.38	532.15	77.79	474.82	532.15
Gm50598	1_Strict_Shared_Up	0	0	4.52	21.71	7.43	15.05	14.11	8.45	9.43	14.06	9.13	6.26	17.9	0	14.11	9.43
Gm35353	1_Strict_Shared_Up	6.01	4.39	3.49	20.73	11.25	12.61	23.87	21.02	24.54	14.93	18.07	28.5	22.55	4.39	20.73	22.55
Mansc4	1_Strict_Shared_Up	3.19	5.95	1.31	11.55	21.41	11.16	15.12	13.49	13.86	16.45	18.83	17.6	14.36	3.19	13.49	16.45
Adgrv1	1_Strict_Shared_Up	299.78	127.87	108.91	557.15	623	2822.23	875.67	569.19	1526.77	566.45	958.89	759.14	742.42	127.87	623	759.14
Cfap20dc	1_Strict_Shared_Up	6.72	3.06	6.18	18.14	24.73	33.31	14.95	15.74	32.76	22.89	29.75	16.49	24.32	6.18	18.14	24.32
Gm45424	1_Strict_Shared_Up	10.11	18.41	2.06	58.57	42.81	59.59	60.78	48.91	61.83	50.62	57.37	37.63	48.22	10.11	58.57	50.62
Gm34921	1_Strict_Shared_Up	6.73	4.6	2.75	12.13	18.03	44.67	41.46	6.31	40.99	5.4	21.39	10.11	29.6	4.6	18.03	21.39
Gm71933	1_Strict_Shared_Up	22.05	8.98	22.67	43.42	63.16	50.41	77.01	57.97	82.37	86.52	40.69	88.41	101.39	22.05	57.97	86.52
Acod1	1_Strict_Shared_Up	6.74	1.53	2.06	16.16	2.25	17.25	9.69	8.68	11.12	8.1	19.11	6.43	13.77	2.06	9.69	11.12
Gpc1	1_Strict_Shared_Up	333.24	183.74	262.83	727.06	877.59	1225.45	1225.84	1098.95	1411.1	870.11	1199.67	1251.16	1267.11	262.83	1098.95	1251.16
Gm69837	1_Strict_Shared_Up	16.79	6.91	5.49	18.27	22.54	46.96	30.11	21.3	41.69	27.64	33.52	38.68	36.39	6.91	22.54	36.39
Ripply1	1_Strict_Shared_Up	3.35	1.54	2.75	10.16	11.27	6.26	15.97	9.47	7.64	6.07	9.89	13.83	15.78	2.75	10.16	9.89
Slc35f2	1_Strict_Shared_Up	36.95	6.68	16.63	50.81	47.95	81.89	66.49	65.61	71.6	42.42	85.04	65.05	84.53	16.63	65.61	71.6
S100a6	1_Strict_Shared_Up	6.21	13.54	5.72	49.05	29.26	35.52	29.64	25.88	33.5	26.16	76.6	30.45	35.58	6.21	29.64	33.5
Ube2c	1_Strict_Shared_Up	3.38	4.9	5.54	26.59	9.09	10.25	12.49	21.46	16.11	19.02	13.82	25.06	34.6	4.9	12.49	19.02
Gm49708	1_Strict_Shared_Up	1.43	8.66	6.3	12.6	45.05	29.59	13.5	20.98	23.06	25.57	26.93	39.89	14.63	6.3	20.98	25.57
Zfp979	1_Strict_Shared_Up	65.22	19.27	53.05	103.25	129.55	217.67	141.86	131.77	206.11	164.25	113.43	262.62	193.72	53.05	131.77	193.72
Fam241b	1_Strict_Shared_Up	30.93	11	16.64	28.35	66.12	63.99	75.04	49.98	61.01	52.77	71.79	57.11	116.76	16.64	63.99	61.01
ENSMUSG00000143548	1_Strict_Shared_Up	3.31	1.51	3.38	6.64	11.1	14.84	9.58	6.46	10.82	9.96	14.46	12.19	7.89	3.31	9.58	10.82
Gm31522	1_Strict_Shared_Up	93.94	82.24	63.4	179.37	217.78	216.59	264.77	271.01	274.09	229.35	457.48	315.78	318.18	82.24	217.78	315.78
Traf1	1_Strict_Shared_Up	2.16	2.36	7.35	15.39	7.59	21.51	11.77	14.12	22.82	9.01	20.62	16.48	23.17	2.36	14.12	20.62
Tnfrsf10b	1_Strict_Shared_Up	12.91	7.67	6.85	29.01	19.86	32.43	37.97	31.45	34.65	41.54	27.1	26.05	34.37	7.67	31.45	34.37
Zfp993	1_Strict_Shared_Up	0	7.34	11.35	44.04	31.36	17.03	23.83	70.47	48.14	39.88	17.25	14.4	39.46	7.34	31.36	39.46
Siglech	1_Strict_Shared_Up	11.02	2.88	2.55	21.9	4.43	22.23	11.14	22.28	27.42	14.11	9.09	6.43	17.98	2.88	21.9	14.11
Cd36	1_Strict_Shared_Up	3443.46	1318.39	1671.18	5747.13	5960.09	5431.44	6976.48	8321.42	7294.86	8577.63	8631.65	8480.35	10953.8	1671.18	5960.09	8577.63
Lgals1	1_Strict_Shared_Up	537.28	170.56	313.69	708.09	902	958.55	1163.4	1324.78	1225.92	1231.3	1239.85	1373.9	1789.25	313.69	958.55	1239.85
ENSMUSG00000135515	1_Strict_Shared_Up	43.74	21.44	10.92	39.36	74.2	61.88	65.25	100.94	52.43	68.14	139.97	101.58	89.73	21.44	65.25	89.73
Saa3	1_Strict_Shared_Up	50.99	33.02	55.92	341.47	100.99	313.71	100.67	142.87	173.76	282.98	111.59	163.24	203.58	50.99	142.87	173.76
S100a11	1_Strict_Shared_Up	13.34	16.92	6.85	38.88	6.77	85.07	37.54	34.71	72.95	35.66	39.39	37.96	54.64	13.34	37.54	39.39
Cstpp1	1_Strict_Shared_Up	18.5	5.45	9.53	33.81	37.03	24.48	30.89	38.48	32.27	28.78	22.82	51.32	36.65	9.53	33.81	32.27
Stap1	1_Strict_Shared_Up	137.86	22.2	15.68	143.66	191.29	170.27	245.36	133.62	272.1	140.03	201.59	180.52	193.92	22.2	170.27	193.92
Rgma	1_Strict_Shared_Up	8.93	3.92	4.46	26.37	9.51	7.37	13.67	22.38	24.01	18.75	12.86	15.41	25.45	4.46	13.67	18.75
Pnldc1	1_Strict_Shared_Up	111.4	23.7	37.47	125.72	255.59	278.33	308.01	194.21	234.47	119.7	255.63	223.58	206.67	37.47	255.59	223.58
Tceal8	1_Strict_Shared_Up	305.56	125.42	180.53	461.93	487.83	682.75	693.49	703.5	689.66	583.21	777.28	761.1	974.43	180.53	682.75	761.1
Nalf2	1_Strict_Shared_Up	37.08	40.66	28.9	107.01	123.93	135.67	118.88	130.95	143.79	113.39	137.71	142.24	131.6	37.08	123.93	137.71
Sulf2	1_Strict_Shared_Up	249.11	261.89	261.04	783.01	862.26	815.4	1029.6	1085.8	1059.8	1103.22	829.55	1000.7	938.97	261.04	862.26	1000.7
Crybg2	1_Strict_Shared_Up	15.53	25.92	31.46	61.5	138.59	86.68	90.25	123.34	111.5	55.44	168.85	79.61	82.89	25.92	90.25	82.89
Limk1	1_Strict_Shared_Up	30.54	37.11	42.35	85.07	52.96	215.88	165.63	135.92	157.94	104.22	162.71	105.96	172.5	37.11	135.92	157.94
S100a4	1_Strict_Shared_Up	0	6.15	2.74	12.27	9.01	20.27	15.19	13.4	15.96	10.75	18.16	8.33	17.73	2.74	13.4	15.96
Gm15411	1_Strict_Shared_Up	27.7	11.6	26.86	51.31	55.42	74.52	80.6	70.01	94.39	72.72	56.8	90.41	77.68	26.86	70.01	77.68
Gm41750	1_Strict_Shared_Up	0	4.48	4.79	12.72	16.97	14.34	15.17	15.51	18.85	17.22	9.94	12.4	15.7	4.48	15.17	15.7
Gm51874	1_Strict_Shared_Up	0	2.3	4.81	10.1	22.53	11.76	14.98	4.73	13.2	8.1	9.94	11.02	14.46	2.3	11.76	11.02
Gm73977	1_Strict_Shared_Up	13.14	8.47	4.38	14.89	37.85	25.92	29.85	19.29	44.34	13.63	34.27	17.8	26.37	8.47	25.92	26.37
Gm71860	1_Strict_Shared_Up	2.6	2.38	3.82	4.72	3.5	12.58	18.96	12.64	9.18	12.8	10.94	10	11.35	2.6	12.58	10.94
Cx3cr1	1_Strict_Shared_Up	13.48	8.44	8.94	30.29	18.03	31.37	22.9	22.88	32.65	20.25	50.49	32.12	34.45	8.94	22.9	32.65
Gm59620	1_Strict_Shared_Up	30.31	11.5	14.44	40.59	42.78	26.63	42.49	66.2	56.26	55.95	49.57	57.09	64.53	14.44	42.49	56.26
Cxcl10	1_Strict_Shared_Up	13.44	18.99	25.46	47.8	29.3	72.5	97.31	40.12	62.37	44.46	97.11	77.78	83.73	18.99	47.8	77.78
Gm74457	1_Strict_Shared_Up	10.09	6.91	1.37	14.18	13.52	43.08	29.17	9.47	29.18	10.12	16.02	17.48	17.87	6.91	14.18	17.48
Gdf15	1_Strict_Shared_Up	66.74	130.51	55.83	412.66	192.71	279.11	397.6	349.62	293.07	431.8	314.67	189.71	286.54	66.74	349.62	293.07
4933405D12Rik	1_Strict_Shared_Up	32.32	9.53	13.31	25.61	68.29	160.94	76.02	67.2	107.52	32.66	47.48	61.62	45.49	13.31	68.29	47.48
Gm72636	1_Strict_Shared_Up	6.61	1.63	5.1	15.92	13.29	16.17	13.02	10.85	21.85	11.27	10.51	8.13	15.54	5.1	13.29	11.27
Lrrc39	1_Strict_Shared_Up	37.27	12.46	7.51	17.86	41.19	49.3	43.53	36.77	57.43	39.61	61.92	52.69	49.94	12.46	41.19	52.69
Sult2a7	1_Strict_Shared_Up	43.66	20.02	27.5	200.58	58.05	84.64	158.25	60.85	86.33	105.32	97.96	99.44	103.08	27.5	84.64	99.44
A930001C03Rik	1_Strict_Shared_Up	39.97	28.25	26.04	76.42	64.33	94	93.3	80.25	99.53	89	140.15	88.76	88.67	28.25	80.25	89
Ly6c2	1_Strict_Shared_Up	6.92	2.46	4.25	25.15	9.3	12.22	9.34	13.01	18.92	11.22	13.34	5.79	17.8	4.25	12.22	13.34
Gbp10	1_Strict_Shared_Up	116.07	63.84	131.36	235.65	224.16	303.03	350.46	233.91	284.06	220.8	511.13	251.96	503.03	116.07	235.65	284.06
Zbtb47	1_Strict_Shared_Up	10.92	11.28	19.55	32.08	36.49	54.64	41.83	50.63	65.44	52.6	42.63	31.76	49.66	11.28	41.83	49.66
H4c12	1_Strict_Shared_Up	13.27	10.74	11.68	39.22	40.69	26.43	38.73	40.92	45.09	29.49	34.93	32.55	54.22	11.68	39.22	34.93
Apobr	1_Strict_Shared_Up	8.6	7.83	13.45	22.32	13.41	30	48.23	30.69	24.22	36.36	38.15	25.75	53.61	8.6	30	36.36
Nim1k	1_Strict_Shared_Up	34.51	21.54	23.29	59.04	90.68	61.9	81.85	80.7	75.92	78.12	80.56	97.07	79.09	23.29	80.7	79.09
Lpar1	1_Strict_Shared_Up	12.29	16.73	19.61	25.78	49.43	63	32.71	43.15	87.74	24.34	58.37	55.95	64.53	16.73	43.15	58.37
Tpm2	1_Strict_Shared_Up	195.29	93.36	146.12	391.61	444.98	379.89	467.61	704.4	370.99	500.83	440.47	520.95	550.54	146.12	444.98	500.83
Clec7a	1_Strict_Shared_Up	103.86	99.49	112.17	168.66	190.38	467.74	278.7	265.16	382.03	290.93	304.74	274.77	525.17	103.86	265.16	304.74
Dyrk3	1_Strict_Shared_Up	21.31	12.47	14.91	109.83	30.53	48.16	50.92	46.31	40.78	63.62	88.15	37.31	29.24	14.91	48.16	40.78
H3c11	1_Strict_Shared_Up	26.59	9.23	10.97	51.38	22.56	32.73	61.03	60.73	33.33	42.99	16.66	38.98	99.41	10.97	51.38	38.98
Gm12250	1_Strict_Shared_Up	23.12	15.81	24.28	97.18	46.42	53.05	49.31	38.69	68.83	52.29	81.88	42.35	101.12	23.12	49.31	68.83
Acot6	1_Strict_Shared_Up	10.15	20.74	17.83	48.49	54.13	61.22	62.58	48.98	54.79	58.64	57.36	52.3	72.85	17.83	54.13	57.36
Slamf7	1_Strict_Shared_Up	7.43	8.07	7.03	31.49	14.29	22.72	14.25	24.45	24.24	17.59	31.11	21.41	29.87	7.43	22.72	24.24
Dync2li1	1_Strict_Shared_Up	3.32	5.31	7.47	20	17.81	18.57	17.9	14.02	24.02	14.66	18.84	16.8	23.77	5.31	17.9	18.84
Treh	1_Strict_Shared_Up	89.58	31	38.23	125.5	83.35	199.8	141.77	132.93	154.36	130.12	218.26	125.16	144.14	38.23	132.93	144.14
Gm13657	1_Strict_Shared_Up	49.57	14.59	10.75	79.48	54.52	71.4	76.02	55.79	92.9	52.32	56.9	54.35	56.25	14.59	71.4	56.25
Gm50340	1_Strict_Shared_Up	15.25	8.27	3.94	23.69	28.16	19.44	17.4	29.55	18.7	17.02	22.78	32.61	22.39	8.27	23.69	22.39
Zfp786	1_Strict_Shared_Up	5.75	2.88	6.1	16.88	11.54	7.22	40.58	12.24	14.83	10.82	14.22	19.57	16.34	5.75	12.24	14.83
Mtnr1a	1_Strict_Shared_Up	39.81	35.57	21.01	39.9	55.55	83.33	67.79	92.77	67.13	68.43	153.23	110.19	89.54	35.57	67.79	89.54
Plin4	1_Strict_Shared_Up	735.8	1151.15	1362.52	3032.72	3028.88	2055.43	2816.08	4340.83	2024.22	4366.2	3304.18	3726.47	3760.22	1151.15	3028.88	3726.47
Gm34802	1_Strict_Shared_Up	7.08	5.39	4.06	16.52	17.19	19.26	12.73	9.14	10.71	9.74	20.05	24.91	14.76	5.39	16.52	14.76
Osbpl3	1_Strict_Shared_Up	390.72	65.41	197.33	405.59	288.8	948.08	910.59	493.18	1004.1	622.58	524.17	536.09	707.51	197.33	493.18	622.58
Gm11752	1_Strict_Shared_Up	50.33	14.6	16.48	44.68	63.12	75.91	103.7	60.74	119.53	52.58	52.54	58.04	83.74	16.48	63.12	58.04
Gbp6	1_Strict_Shared_Up	133.15	96.35	128.37	282.58	207.08	355.16	282.18	313.38	283.78	230.66	479.72	336.73	521	128.37	282.58	336.73
Sema4d	1_Strict_Shared_Up	10.58	7.11	9.59	36.65	7.07	86.12	28.88	31.94	21.8	33.15	27.04	20.85	35.6	9.59	31.94	27.04
Ccng1	1_Strict_Shared_Up	1078.55	828.53	855.17	3321.82	2379.49	2714.75	3172.35	2977.03	2761.3	2983.87	2991.68	2558.8	2868.8	855.17	2977.03	2868.8
Gm16278	1_Strict_Shared_Up	3.37	4.6	2.06	16.17	11.27	10.19	16.76	9.47	15.28	11.47	6.88	8.27	8.95	3.37	11.27	8.95
Vnn1	1_Strict_Shared_Up	1251.07	816.64	906.67	2860.93	1999.39	2350.8	3323.94	2937.02	2148.38	2786.68	3410.35	3542.48	3297.19	906.67	2860.93	3297.19
Gm13236	1_Strict_Shared_Up	132.77	146.16	134.82	296.76	310.11	409.48	293.75	339.78	375.2	425.84	389.78	522.77	417.51	134.82	310.11	417.51
Dglucy	1_Strict_Shared_Up	449.48	317.06	425.73	1015.08	931.61	1246.08	1386.42	1166.69	1149.96	1321.12	1216.45	1129.62	1220.72	425.73	1166.69	1216.45
Cyp46a1	1_Strict_Shared_Up	22.7	12.77	23.99	31.16	45.84	38.35	111.04	48.65	85.01	67.3	45.06	41.65	52.14	22.7	45.84	52.14
Gm31600	1_Strict_Shared_Up	76.07	43.11	78.39	82.55	234.45	213.83	240.5	186.5	262.56	214.78	128.28	213.08	168.45	76.07	213.83	213.08
Zbp1	1_Strict_Shared_Up	9.35	28.86	26.68	104.29	19.32	63.11	65.2	53.56	54.56	82.72	53.9	55.43	89.11	26.68	63.11	55.43
ENSMUSG00000143506	1_Strict_Shared_Up	47.31	50.02	36.49	85.11	109.84	116.83	112.31	75.85	128.98	116.28	115.33	140.13	143.35	47.31	109.84	128.98
Zfp992	1_Strict_Shared_Up	171.94	124.27	91.51	288.66	295.17	467.42	216.57	326.57	336.91	336.14	263.98	513.83	390.04	124.27	295.17	336.91
Padi2	1_Strict_Shared_Up	3.37	3.84	4.13	18.17	15.77	19.61	9.68	11.04	6.95	16.2	9.18	15.6	9.65	3.84	15.77	9.65
Gm30446	1_Strict_Shared_Up	38.62	25.84	18.4	41.27	33.34	111.48	76.28	59.17	126.35	60.57	77.64	42.6	77.94	25.84	59.17	77.64
Spink5	1_Strict_Shared_Up	20.23	19.18	11.01	64.59	63.09	50.19	60.74	61.53	60.43	40.5	55.09	35.78	37.21	19.18	61.53	40.5
Bmyc	1_Strict_Shared_Up	26.86	32.26	32.28	85.23	69.88	76.71	54.9	105.7	79.22	97.09	67.81	124.31	88.6	32.26	76.71	88.6
Trim13	1_Strict_Shared_Up	23.55	12.28	21.31	50.6	40.57	45.44	39.73	33.13	55.58	41.15	44.29	60.66	59.17	21.31	40.57	55.58
Dcaf4	1_Strict_Shared_Up	18.78	19.94	24.89	45.11	73.21	64.14	67.89	86.48	70.27	62.17	42.93	70.76	68.35	19.94	67.89	68.35
Eda	1_Strict_Shared_Up	26.43	19.69	41.79	38.68	72.62	60.38	75.13	73.01	79.24	81.09	54.63	84.49	134.67	26.43	72.62	81.09
Mx1	1_Strict_Shared_Up	7.34	17.18	10.78	81.65	24.96	56.16	55.29	22.07	37.86	25.02	37.99	36.76	40.51	10.78	55.29	37.86
A630031M04Rik	1_Strict_Shared_Up	211.41	126.99	93.76	259.23	421.13	436.46	495.55	319.88	443.47	309.35	359.51	391.42	429.93	126.99	421.13	391.42
Mirt2	1_Strict_Shared_Up	15.48	9.23	6.72	26.98	39.79	31.23	28.02	13.58	40.92	15.52	23.55	27.37	20.14	9.23	28.02	23.55
C730002L08Rik	1_Strict_Shared_Up	95.36	111.23	105.53	184.45	325.59	197.83	185.72	267.71	230.33	334.43	285.58	335.18	279.84	105.53	197.83	285.58
Gpat3	1_Strict_Shared_Up	218.4	171.92	180.54	460.72	450.62	281.06	413.15	530.5	341.91	787.87	393.36	550.49	544.8	180.54	450.62	544.8
2010003K11Rik	1_Strict_Shared_Up	235.25	447.68	241.86	948.55	703.21	494.15	582.77	862.95	696.91	682.47	1146.27	776.54	992.5	241.86	703.21	776.54
Gm31121	1_Strict_Shared_Up	84.89	55.57	44.06	133.78	139.41	174.6	64.57	141.64	160.07	157.67	269.19	172.1	63.57	55.57	139.41	160.07
Ripor2	1_Strict_Shared_Up	71.22	26.5	30.77	100.76	72.4	204.02	205.73	39.21	177.65	81.4	77.13	112.29	119.12	30.77	100.76	112.29
Oasl2	1_Strict_Shared_Up	28.87	48.91	43.84	131.58	70.73	111.84	93.94	82.47	139.77	81.9	116.84	99.06	143.15	43.84	93.94	116.84
Ace	1_Strict_Shared_Up	12.63	9.34	14.29	51.21	10.55	32.08	28.82	34.46	31.26	40.5	23.97	28.36	36.79	12.63	32.08	31.26
Clstn3	1_Strict_Shared_Up	1012.2	313.64	328.21	961.05	1450.96	1619.67	1376.49	1434.61	1320.91	1439	1463.85	1496.53	1648.32	328.21	1434.61	1463.85
Gm19840	1_Strict_Shared_Up	6.71	6.15	8.24	20.31	31.56	16.43	16.84	14.99	18.07	14.83	22.08	21.19	21.28	6.71	16.84	21.19
Gm50240	1_Strict_Shared_Up	42.31	19.27	17.91	37.81	48.46	73.97	51.17	49.61	67.48	55.85	53.57	68.31	49.91	19.27	49.61	55.85
Oas3	1_Strict_Shared_Up	19.52	23.68	17.42	62.32	26.09	51.46	62.86	35.01	71.91	47.55	42.82	39.84	68.29	19.52	51.46	47.55
Tafa5	1_Strict_Shared_Up	43.8	16.88	32.33	52.53	72.11	52.53	78.43	99.39	76.42	65.46	45.87	95.49	99.86	32.33	72.11	76.42
Samd9l	1_Strict_Shared_Up	407.95	317.01	324.18	769.41	683.13	840.71	1149.86	532.85	1141.23	696.78	805.92	805.89	1178.66	324.18	769.41	805.92
Extl1	1_Strict_Shared_Up	118.45	89.37	106.29	211.1	388.41	305.28	297.49	262.58	289.2	222.18	221.42	333.72	302.28	106.29	297.49	289.2
A730036I17Rik	1_Strict_Shared_Up	13.16	20.11	8.33	44.64	31.69	65.51	45.92	36.4	72.74	22.79	34.59	31.13	26.74	13.16	44.64	31.13
Pparg	1_Strict_Shared_Up	376.26	92.89	157.54	347.49	452.94	742.32	770.57	424.4	610.42	395.97	423.4	595.15	638.26	157.54	452.94	595.15
Ggct	1_Strict_Shared_Up	40.57	78.57	64.07	150.22	143.56	109.6	115.74	165.87	159.68	174.91	152.62	154.99	195.56	64.07	143.56	159.68
Tlr12	1_Strict_Shared_Up	193.18	153.17	179.04	283.45	331.83	543.25	458.82	253.38	418.81	301.31	650.84	389.19	522.21	179.04	331.83	418.81
Inhbe	1_Strict_Shared_Up	1102.61	1225.74	498.2	2090.89	2070.71	3723.91	2605.35	1864	2210.35	1369.6	2882.81	2846.85	3011.09	1102.61	2090.89	2846.85
Bhlhb9	1_Strict_Shared_Up	57.24	25.61	52.57	78.72	101.16	95.45	138.55	103.12	115.5	118.55	70.21	128.17	126.86	52.57	101.16	118.55
Gas7	1_Strict_Shared_Up	84.15	59.61	49.84	139.3	129.76	134.61	192.12	199.16	163.04	100.16	196.01	167.28	177.67	59.61	139.3	167.28
Arsg	1_Strict_Shared_Up	309.97	244.01	172.51	411.74	482.9	685.22	532.46	421.82	532.9	421.87	1133.33	470.31	517.82	244.01	482.9	517.82
Flrt2	1_Strict_Shared_Up	17	7.73	14.29	29.36	31.86	26.68	39.26	32.34	23.85	26.18	29.91	34.56	38.18	14.29	31.86	29.91
Fam110a	1_Strict_Shared_Up	33.48	18.27	22.84	66.19	37.99	56.42	47.07	47.57	56.05	40.14	75.99	50.52	64.03	22.84	47.57	56.05
Gm38560	1_Strict_Shared_Up	6.73	13.47	4.62	19.99	11.71	31.07	24.82	17.82	30.6	19.07	24.67	19.34	15.68	6.73	19.99	19.34
Mgmt	1_Strict_Shared_Up	330.21	215.59	284.1	680.76	601.65	580.99	782.39	661.03	702.32	695.12	651.54	639.85	719.79	284.1	661.03	695.12
Gm75621	1_Strict_Shared_Up	72.17	18.14	25.56	53.21	102.39	87.28	83.83	50.4	104.18	57.97	89.66	92.88	82.09	25.56	83.83	89.66
Ppp2r1b	1_Strict_Shared_Up	483.01	257.16	331.52	773.65	825.88	748.56	679.19	803.28	747.42	777.51	1084.54	885.45	870.51	331.52	773.65	870.51
Cgref1	1_Strict_Shared_Up	29.25	61.81	15.61	89.71	64.76	148.71	82.85	67.33	127.19	51.65	108.17	70.18	94.61	29.25	82.85	94.61
H2ac24	1_Strict_Shared_Up	26.66	33.84	10.28	51.22	56.39	53.83	34	72.58	48.63	53.81	49.22	49.11	83.94	26.66	53.83	49.22
Usp18	1_Strict_Shared_Up	61.68	59.22	61.01	150.22	112.86	144.07	189.99	131.77	185.64	100.06	162.09	141.79	159.35	61.01	144.07	159.35
Serpine1	1_Strict_Shared_Up	42.86	39.64	8.75	106.69	42.69	131.62	70.83	68.89	65.95	61.04	69.06	78.22	76.97	39.64	70.83	69.06
Aen	1_Strict_Shared_Up	179.21	278.21	240.01	854.57	577.3	627.49	647.32	724.41	621.04	584.92	644.96	509.67	556.98	240.01	647.32	584.92
Gm70432	1_Strict_Shared_Up	9.91	13.97	10.45	38.43	38.16	28.12	21.2	15.69	36.44	20.34	26.49	32.23	29.59	10.45	28.12	29.59
Omd	1_Strict_Shared_Up	169.06	112.62	137.39	230.45	276.63	369.8	255.48	301.39	342.39	353.22	356.89	296.24	299.98	137.39	276.63	342.39
Cdk2ap1rt	1_Strict_Shared_Up	0	8.44	10.99	24.3	11.27	27.41	20.32	25.23	24.31	17.53	23.65	24.82	11	8.44	24.3	23.65
Adora1	1_Strict_Shared_Up	432.99	138.64	138.62	505.39	597.03	650.21	761.55	598.26	600.67	442.25	533.49	566	634.94	138.64	598.26	566
Aldh3a2	1_Strict_Shared_Up	14320.4	7815.52	10188.5	17093.3	19865.7	23056.5	26129.2	25544.1	23633	23878.7	30165.3	24567.2	28565	10188.5	23056.5	24567.2
H1f3	1_Strict_Shared_Up	236.09	204.79	115.62	322.82	407.82	382.78	379.24	343.14	423.03	329.43	437.08	383.42	605.92	204.79	379.24	423.03
Degs1l	1_Strict_Shared_Up	558.86	202.61	290.87	564.22	788.73	923.25	808.04	795.92	984.43	770.52	747.22	729.44	881.72	290.87	795.92	770.52
Ly6a	1_Strict_Shared_Up	48.43	47.81	33.26	140.44	76.4	100.65	98.63	90.04	104.72	97.1	85.54	79.56	133.84	47.81	98.63	97.1
Gbp2	1_Strict_Shared_Up	90.96	69.82	82.54	234.4	117.18	206.18	176.27	138.04	172.98	161.96	260.7	126.71	234.14	82.54	176.27	172.98
Nqo1	1_Strict_Shared_Up	131.22	60.64	111.37	184.17	216.35	217.82	229.55	207.46	243.86	205.75	131.33	251.85	339.86	111.37	216.35	243.86
Ifit3	1_Strict_Shared_Up	134.63	145.83	135.45	317.59	191.55	355	353.86	204.3	446.72	246.93	281.1	281.18	403.27	135.45	317.59	281.18
Tmem237	1_Strict_Shared_Up	80.03	36.49	38.57	88.78	100.11	99.85	112.27	79.23	117.17	93.01	80.31	111.38	158.52	38.57	99.85	111.38
Tmem43	1_Strict_Shared_Up	243.49	206.67	246.8	613.42	485.53	566.4	468.55	483.56	534.49	465.08	623.11	480.79	638.73	243.49	485.53	534.49
Gm42879	1_Strict_Shared_Up	16.84	10.74	8.25	24.26	27.04	25.87	29.98	21.3	35.43	16.87	28.28	22.04	21.34	10.74	25.87	22.04
Adissp	1_Strict_Shared_Up	70.56	23.05	33.39	57.64	59.31	105.57	98.92	60.52	83.91	75	85.05	100.83	92.57	33.39	60.52	85.05
Myo5a	1_Strict_Shared_Up	13.25	35.93	15.74	66.51	29.47	58.17	79.77	45.56	48.17	66.26	41.52	55.42	45.76	15.74	58.17	48.17
Gna14	1_Strict_Shared_Up	107.57	80.69	66.74	205.79	149.48	318.06	207.32	142.61	274.92	132.19	153.46	210.39	183.62	80.69	205.79	183.62
Osbpl5	1_Strict_Shared_Up	102.3	42.41	72.47	134.34	139.68	101.54	184.7	133.44	179.07	226.12	68.99	129.82	180.73	72.47	134.34	179.07
Lpl	1_Strict_Shared_Up	227.66	168.28	186.13	390.71	217.78	614.71	323.59	516.7	428.13	304.1	419.84	374.56	680.99	186.13	390.71	419.84
Pdzrn3	1_Strict_Shared_Up	114.93	71.78	159.01	290.73	224.46	201.72	190.95	272.13	199.12	261.76	270.41	315.97	277.49	114.93	224.46	270.41
Adrb3	1_Strict_Shared_Up	3.31	32.81	18.02	66.08	48.95	46.21	41.88	41.5	40.84	42.8	33.6	59.68	41.47	18.02	46.21	41.47
Them6	1_Strict_Shared_Up	20.2	24.56	17.19	48.55	51.83	68.96	51.18	42.6	59.75	36.43	55	35.83	41.98	20.2	51.18	41.98
Angptl8	1_Strict_Shared_Up	177.81	142.91	72.09	312.85	209.64	544.6	374.13	199.56	373.18	198.84	328.1	176	336.3	142.91	312.85	328.1
Il1rn	1_Strict_Shared_Up	61.9	72.69	20.9	149.5	82.86	109.99	119.7	105.51	139.77	81.74	60.48	112.9	155.54	61.9	109.99	112.9
Fam78a	1_Strict_Shared_Up	2.91	17.21	14.5	32.23	17.5	36.7	35.18	29.87	31.99	40.52	21.78	18.21	35.92	14.5	32.23	31.99
Slc16a6	1_Strict_Shared_Up	54.5	52.17	47.74	126.61	73.57	115.45	112.86	89.08	54.7	107.98	124.42	123.26	150.69	52.17	112.86	123.26
Gm17767	1_Strict_Shared_Up	10.64	16.07	10.76	20.73	19.83	33.37	22.76	32.47	27.22	16.85	34.72	27.69	33.06	10.76	22.76	27.69
Gm56765	1_Strict_Shared_Up	6.72	13.82	32.99	58.74	42.82	43.86	48.61	39.44	51.42	47.21	41.97	35.87	48.82	13.82	43.86	47.21
Tlr5	1_Strict_Shared_Up	159.2	141.86	172.41	249.67	366.87	392.92	451.44	291.89	375.31	302.86	265.13	450.1	328.72	159.2	366.87	328.72
Ces2e	1_Strict_Shared_Up	6187.31	3902.87	4540.28	10016	9054.31	11033.8	10970.9	10212.6	10297	10092.6	11537.2	10169	10838.6	4540.28	10212.6	10297
Exoc4	1_Strict_Shared_Up	678.56	547.66	685.87	1569.94	1218.65	1695.26	1608.3	1212.42	1266.35	1340.22	1436.13	1455.1	1395.17	678.56	1569.94	1395.17
Atp8b2	1_Strict_Shared_Up	37.43	35.2	45.92	89.45	89.71	53.07	90.37	92.68	93.16	114.4	94.97	67.79	61.32	37.43	89.71	93.16
Ephx1	1_Strict_Shared_Up	6071.45	5017.72	5732.19	11757.5	9718.08	13155.6	12830.2	12007.8	12213.4	11971	12318.8	10332.2	13064	5732.19	12007.8	12213.4
Mbl2	1_Strict_Shared_Up	3739.25	3770.75	4068.38	10815.9	6416.96	8533.03	10757.8	7599.31	8490.35	8931.31	8061.37	6315.39	8240.05	3770.75	8533.03	8240.05
Pomk	1_Strict_Shared_Up	124.71	82.85	93.57	189.81	189.28	207.02	190.23	179.85	207.01	176.16	182.06	187.22	210.83	93.57	189.81	187.22
Gm9958	1_Strict_Shared_Up	16.49	10.52	20.88	31.69	24.28	38.24	25.06	38.63	44.23	23.13	32.93	26.1	34.31	16.49	31.69	32.93
Ccdc142os	1_Strict_Shared_Up	4.52	10.56	13.04	24.73	28.37	28.19	26.86	26.57	22.25	21.31	25.07	22.08	21.86	10.56	26.86	22.08
Plek	1_Strict_Shared_Up	131.71	89.41	126.34	413.71	129.85	265.22	205.54	173.36	226.59	241.5	246.61	154.95	283.42	126.34	205.54	241.5
Snhg15	1_Strict_Shared_Up	124.26	34.3	75.77	178.83	92.62	203.91	161.21	132.28	131.82	141.28	158.62	124.78	127.8	75.77	161.21	131.82
Coro1a	1_Strict_Shared_Up	83.58	63.93	53.82	193.54	112.28	161.4	114.84	97.38	135.25	114.04	167.73	93.25	133.8	63.93	114.84	133.8

## Sheet: Fructose Specific Up
Fructose Specific Up (n = 116) — Normalized Counts
		CD			HFD					HFSD					Group Medians
Gene	Category	CD4047tr	CD4008tr	CD4006tr	HFD4052tr	HFD4019tr	HFD4048tr	HFD4049tr	HFD4020tr	HFSD4053tr	HFSD4039tr	HFSD4038tr	HFSD4035tr	HFSD4044tr	CD_median	HFD_median	HFSD_median
Sprr1a	2_Fructose_Specific_Up	0	0	0	2.03	0	10.94	1.77	8.67	11.81	2.02	10.64	13.82	13.71	0	2.03	11.81
Zfp990	2_Fructose_Specific_Up	2.64	0	0	0	1.76	4.83	9.46	1.85	7.67	11.87	1.77	16.56	11.06	0	1.85	11.06
Pacrg	2_Fructose_Specific_Up	0	0	0.89	5.26	0	14.5	2.29	2.56	23.86	5.26	12.06	10.01	12.51	0	2.56	12.06
Gm68572	2_Fructose_Specific_Up	0	1.54	2.05	2.04	0	10.14	7.13	18.13	11.11	36.98	51.5	38.83	30.05	1.54	7.13	36.98
Gm53794	2_Fructose_Specific_Up	0	0	4.82	0	4.51	36.85	4.41	34.71	15.28	24.97	42.82	41.32	12.4	0	4.51	24.97
Gins2	2_Fructose_Specific_Up	0	3.86	1.54	3.62	4.04	17.88	6.41	26.54	24.78	6.04	14.81	50.6	36.68	1.54	6.41	24.78
Gpnmb	2_Fructose_Specific_Up	30.06	6.08	4.96	25.37	19.13	170.81	25.89	61.36	148.64	61.15	45.62	55.5	169.95	6.08	25.89	61.15
Kifc1	2_Fructose_Specific_Up	5.84	0	2.01	9.05	2.19	8.83	11.31	4.1	14.79	12.24	10.34	9.01	17.9	2.01	8.83	12.24
Hr	2_Fructose_Specific_Up	0	29.7	8.98	21.94	12.25	36.24	16.09	66.74	31.47	100.3	183.05	64.01	84.93	8.98	21.94	84.93
Cyp2a4	2_Fructose_Specific_Up	13.46	4.61	4.81	40.46	4.51	4.7	30	37.86	27.1	65.44	11.46	28.49	105.29	4.81	30	28.49
Gm56970	2_Fructose_Specific_Up	0	1.95	1.31	0	5.86	5.47	8.43	8.75	8.43	10.88	14.32	3.51	13.28	1.31	5.86	10.88
Cdc20	2_Fructose_Specific_Up	6.69	6.86	7.52	2.01	8.96	11.68	2.63	22.74	13.12	14.08	32.65	52.96	101.52	6.86	8.96	32.65
Gm11832	2_Fructose_Specific_Up	8.61	2.45	2.35	0	5.52	7.36	10.79	15.22	4.15	7.49	55.44	18.07	27.3	2.45	7.36	18.07
Fignl1	2_Fructose_Specific_Up	0	4.53	2.71	9.4	4.44	13.86	10.42	6.61	16.16	30.05	7.83	11.76	25.13	2.71	9.4	16.16
Ckap2	2_Fructose_Specific_Up	9.02	12.17	7.37	12.6	8.05	14.69	11.8	28.16	22.94	40.32	37.09	51.23	122.15	9.02	12.6	40.32
Adig	2_Fructose_Specific_Up	3.81	2.31	2.07	6.44	5.34	9.75	6.92	10.31	7.13	11.61	13.87	19.33	18.39	2.31	6.92	13.87
Fam83a	2_Fructose_Specific_Up	7.38	8.05	3.02	42.85	11.52	27.71	6.44	15.97	41.83	14.79	18.44	53.22	25.16	7.38	15.97	25.16
Npnt	2_Fructose_Specific_Up	12.39	1.38	10.83	20.24	12.2	13.35	10.13	47.93	3.41	47.19	62.98	33.13	43.65	10.83	13.35	43.65
Hmmr	2_Fructose_Specific_Up	3.04	6.92	9.94	3.64	20.32	12.02	18.27	35.08	15.66	15.22	35.47	42.21	75.81	6.92	18.27	35.47
Gm29458	2_Fructose_Specific_Up	13.13	0.62	3.09	3.29	10.01	9.54	14.64	6.48	26.53	11.53	11.05	8.36	15.77	3.09	9.54	11.53
Tnfrsf23	2_Fructose_Specific_Up	2.15	4.9	5.75	13.07	5.75	26.29	13.64	10.58	20.23	29.53	13.7	19.35	34.54	4.9	13.07	20.23
Dlgap5	2_Fructose_Specific_Up	1.99	7.23	3.96	4.98	0	18.66	4.7	12.48	15.63	16.61	5.66	16.95	62.09	3.96	4.98	16.61
Gm58579	2_Fructose_Specific_Up	3.31	6.86	6.86	12.49	4.56	28.71	9.89	3.92	35.25	28.12	49.77	13.1	23.55	6.86	9.89	28.12
Kif2c	2_Fructose_Specific_Up	0	7.59	1.88	3.68	10.26	11.42	5.61	7.9	6.96	16.04	18.53	16.71	31.35	1.88	7.9	16.71
Gm50323	2_Fructose_Specific_Up	3.29	19.77	3.31	11.85	22.02	16.74	21.54	23.9	33.27	31.58	49.96	31.42	74.48	3.31	21.54	33.27
Acnat2	2_Fructose_Specific_Up	191.34	411.72	378.38	1182.39	1354.13	239.54	576.74	1653.36	437.66	1978.9	1464.33	1668.83	2043.29	378.38	1182.39	1668.83
H2ac11	2_Fructose_Specific_Up	0	6.16	5.48	0	15.79	16.39	8.95	24.46	25.71	15.47	18.18	19.46	32.77	5.48	15.79	19.46
Pbk	2_Fructose_Specific_Up	0	5.84	3.49	11.97	5.71	17.92	5.22	10.67	3.52	10.83	16.46	28.44	30.82	3.49	10.67	16.46
Slc34a2	2_Fructose_Specific_Up	0	11.43	7.36	13.51	3.71	21.3	5.07	13.64	2.86	56.07	44.1	33.99	23.83	7.36	13.51	33.99
Gm15163	2_Fructose_Specific_Up	3.36	2.3	2.06	6.08	15.78	5.48	4.42	5.52	11.81	15.51	12.21	1.84	11.69	2.3	5.52	11.81
Gm56760	2_Fructose_Specific_Up	0	7.83	4.51	6.72	7.79	18.2	16.33	15.15	29.13	9.18	9.28	26.65	32.44	4.51	15.15	26.65
Cdk1	2_Fructose_Specific_Up	6.31	16.62	19.29	13.32	33.59	20.67	20.01	29.9	46.67	68.16	44.34	62.82	120.3	16.62	20.67	62.82
Cenpf	2_Fructose_Specific_Up	8.06	11.61	10.97	16.07	8.97	65.55	9.11	46.29	35.68	28.71	40.06	46.43	75.9	10.97	16.07	40.06
Scd3	2_Fructose_Specific_Up	0	6.9	2.75	6.06	11.27	9.41	8.81	13.41	16.67	21.6	16.83	14.68	17.91	2.75	9.41	16.83
Nusap1	2_Fructose_Specific_Up	16.13	4.63	10.85	37.67	11.33	15.41	7.97	29.89	19.64	41.16	31.78	37.41	67.12	10.85	15.41	37.41
Prc1	2_Fructose_Specific_Up	11.16	12.7	11.8	18.65	30.11	36.32	10.59	23.35	22.46	41.56	48.78	43.01	92.81	11.8	23.35	43.01
Phospho1	2_Fructose_Specific_Up	64.59	34.81	25.29	53.16	67.09	101.25	103.42	136.61	81.27	89.17	319.61	142.56	161.71	34.81	101.25	142.56
Galnt3	2_Fructose_Specific_Up	2.31	3.15	5.18	12.96	3.09	7.52	6.03	23.86	17.31	16.04	17.07	8.17	19.86	3.15	7.52	17.07
A130051J06Rik	2_Fructose_Specific_Up	7.39	1.57	2.52	4.74	3.3	8.17	6.73	10.12	9.98	10.06	20.77	4.95	15.46	2.52	6.73	10.06
Fsd2	2_Fructose_Specific_Up	6.74	3.07	5.5	16.15	11.27	14.9	7.92	8.68	17.37	22.95	13.01	17.44	21.36	5.5	11.27	17.44
Knstrn	2_Fructose_Specific_Up	8.81	7.95	4.36	12.12	13.67	18.43	6.83	21.97	6.18	14.72	21.42	29.34	52.73	7.95	13.67	21.42
H3c8	2_Fructose_Specific_Up	0	3.84	3.42	6.13	0	9.36	6.25	2.36	12.5	14.79	6.81	10.17	16.39	3.42	6.13	12.5
Gm58776	2_Fructose_Specific_Up	11.87	1.27	2.85	3.36	14.52	6.47	8.79	7.24	6.66	12.31	17.06	20.42	8.49	2.85	7.24	12.31
Gm14412	2_Fructose_Specific_Up	3.36	3.07	7.56	10.12	9.01	9.4	9.71	14.2	20.15	16.87	22.91	18.38	20.64	3.36	9.71	20.15
Ppp1r36dn	2_Fructose_Specific_Up	9.46	8.92	10.33	38.94	3.22	47.64	16.38	7.81	25.41	62.71	24.63	27.28	42.45	9.46	16.38	27.28
Spon2	2_Fructose_Specific_Up	69.41	55.72	54.82	28.42	88.58	136.3	59.5	170.92	70.95	76.88	555.5	204.99	221.9	55.72	88.58	204.99
Nuf2	2_Fructose_Specific_Up	3.36	4.97	4.53	8.06	0	14.06	11	15.74	13.54	14.13	16.76	11.9	28.91	4.53	11	14.13
Gm64979	2_Fructose_Specific_Up	5.12	7.61	2.62	13.91	7.78	8.95	11.46	3	26.05	17.98	16.26	9.12	25.84	5.12	8.95	17.98
Gm1968	2_Fructose_Specific_Up	0	3.67	7.72	11.71	7.41	18.42	11.12	7.78	20.39	13.87	26.04	11.15	15.46	3.67	11.12	15.46
Trem2	2_Fructose_Specific_Up	20.52	4.64	9.28	7.82	16.69	43.11	21.47	24.82	50.6	25.27	32.21	18.86	43.01	9.28	21.47	32.21
Cyp2c39	2_Fructose_Specific_Up	47.13	28.4	44.01	58.66	54.09	33.7	99.7	107.28	94.48	192.29	123.76	125.87	144.53	44.01	58.66	125.87
Mug-ps1	2_Fructose_Specific_Up	0	19.94	30.96	36.33	29.29	69.01	47.54	38.65	61.82	36.45	103.29	82.58	59.95	19.94	38.65	61.82
Slc66a3	2_Fructose_Specific_Up	6.44	3.44	4.62	9.46	5.27	14.36	12.69	7.79	20.18	5.66	10.25	21.76	18.77	4.62	9.46	18.77
Mdfic2	2_Fructose_Specific_Up	2.65	5.77	6.78	6.35	3.54	14.22	13.15	18.94	21.84	8.49	25.1	15.58	22.82	5.77	13.15	21.84
Gm69483	2_Fructose_Specific_Up	9.48	3.6	10.73	12.3	16.93	8.83	12.43	19.26	19.66	25.29	23.32	29.19	30.52	9.48	12.43	25.29
Gm36041	2_Fructose_Specific_Up	138.88	73.52	66.94	125.54	243.66	158.18	227.4	214.7	131.83	161.65	730.96	284.57	222.84	73.52	214.7	222.84
Mroh2a	2_Fructose_Specific_Up	14.89	9.92	32.86	9.65	13.26	62.97	74.74	63.66	61.26	67.36	61.47	67.74	65.41	14.89	62.97	65.41
Gstm3	2_Fructose_Specific_Up	242.1	204.99	166.32	275.46	331.3	616.46	339.33	388.09	990.09	380.41	512.78	488.34	1013.55	204.99	339.33	512.78
H2bc23	2_Fructose_Specific_Up	6.2	11.24	9.34	16.95	4.71	34.4	12.94	23.92	21.8	33.15	22.55	29.11	47.45	9.34	16.95	29.11
Gm31813	2_Fructose_Specific_Up	4.88	28.09	7.61	33.43	29.1	23.07	43.72	22	22.87	74.05	26.16	46.78	46.31	7.61	29.1	46.31
Bnip5	2_Fructose_Specific_Up	3.21	6.57	3.93	3.84	6.43	4.48	5.03	9.01	25.23	17.34	18.2	6.11	13.11	3.93	5.03	17.34
Ndc80	2_Fructose_Specific_Up	4.08	7.26	2.85	6.09	5.23	13.77	6.61	10.89	11.79	14.82	14.02	11.34	27.11	4.08	6.61	14.02
D17H6S56E-5	2_Fructose_Specific_Up	43.62	65.46	67.39	139.7	88.59	68.44	57.2	179.65	114.65	138.96	104.54	172.68	391.07	65.46	88.59	138.96
Cxcl9	2_Fructose_Specific_Up	116.86	46.29	74.36	135.41	107.62	246.65	118.86	113.69	145.52	300.92	273.61	176.2	221.6	74.36	118.86	221.6
Gal3st1	2_Fructose_Specific_Up	82.95	20.42	42.02	50.44	44.42	86.6	108.32	110.21	119.77	147.21	147.08	100.51	147.38	42.02	86.6	147.08
Nol3	2_Fructose_Specific_Up	10.11	4.6	6.19	10.1	9.01	13.33	12.33	11.04	17.37	14.85	13	20.19	21.36	6.19	11.04	17.37
Gm59496	2_Fructose_Specific_Up	13.33	17.69	67.15	73.74	36.09	47.59	82.3	85.2	123.66	167.48	51.5	62.07	92.15	17.69	73.74	92.15
Gm45589	2_Fructose_Specific_Up	43.63	16.63	34.21	29.78	70.56	70.25	61.39	67.55	64.66	57.52	121.71	97.36	89.31	34.21	67.55	89.31
Fermt1	2_Fructose_Specific_Up	12.75	5.8	12.36	19.08	19.17	11.86	14.98	20.13	36.83	37.01	21.7	26.02	18.24	12.36	19.08	26.02
Acot2	2_Fructose_Specific_Up	212.17	245.55	204.95	392.15	414.64	284.54	544.01	522.99	457.82	822.56	548.01	562.99	752.53	212.17	414.64	562.99
Ocstamp	2_Fructose_Specific_Up	10.11	14.58	12.38	22.21	9.01	28.23	9.69	19.72	24.31	33.07	52.02	35.79	37.2	12.38	19.72	35.79
Gm26714	2_Fructose_Specific_Up	0	5.52	9.59	3.68	21.17	15.18	9.62	9.8	15.03	24.12	12.65	16.21	20.42	5.52	9.8	16.21
Dtl	2_Fructose_Specific_Up	6.72	9.09	7.32	23.34	4.25	18.33	14.68	13.79	21.55	13.13	16.69	21.49	38.54	7.32	14.68	21.49
H3c3	2_Fructose_Specific_Up	23.42	13.84	19.89	14.28	31.57	39.85	12.46	37.07	36.14	47.14	45.54	33.26	94.48	19.89	31.57	45.54
Insig2	2_Fructose_Specific_Up	3212.08	4829.95	4667.49	5135.05	5659.91	4731.74	3854.65	10669.2	4018.37	11281.6	20433.6	13146.1	10229	4667.49	5135.05	11281.6
9030619P08Rik	2_Fructose_Specific_Up	65.96	95.75	116.48	103.68	188.74	174.47	177.2	221.09	134.63	393.02	289.27	227.07	272.84	95.75	177.2	272.84
Fam131c	2_Fructose_Specific_Up	13.45	15.35	16.5	20.25	45.07	23.5	25.61	39.44	39.6	33.73	54.2	37.69	49.52	15.35	25.61	39.6
Serpinb6b	2_Fructose_Specific_Up	35.83	90.39	101.01	142.63	61.71	90.52	74.43	140.98	103.78	217.5	299.73	214.98	249.4	90.39	90.52	217.5
Mki67	2_Fructose_Specific_Up	50.26	59.99	59.6	65.74	50.35	65.74	51.61	150.52	141.19	95.55	116.91	172.51	256.14	59.6	65.74	141.19
Ncapg2	2_Fructose_Specific_Up	12.87	42.13	28.79	46.44	66.12	46.86	54.48	48.32	77.99	74.23	70.08	59.41	123.3	28.79	48.32	74.23
Cyp2c38	2_Fructose_Specific_Up	876.07	455.73	948.61	1104.99	1160.48	617.05	1416.78	1699.13	1349.77	2536.86	2435.6	1803.91	2182.08	876.07	1160.48	2182.08
Top2a	2_Fructose_Specific_Up	38.96	75.37	52.02	70.56	92.51	72.83	38.9	125.26	111.87	94.61	111.85	102.65	338.23	52.02	72.83	111.85
Neu2	2_Fructose_Specific_Up	31.08	24.06	24.46	53.16	36.06	36.95	56.75	26.9	73.02	62.27	69.32	74.09	63.23	24.46	36.95	69.32
Sgo2a	2_Fructose_Specific_Up	9.97	10.58	9.92	7.96	15.54	10.05	6.94	12.44	16.43	18.98	25.45	24.1	51.81	9.97	10.05	24.1
9430064I24Rik	2_Fructose_Specific_Up	6.74	7.67	8.25	8.08	11.27	13.33	18.51	8.68	22.23	12.15	29.06	16.53	23.42	7.67	11.27	22.23
Gm75798	2_Fructose_Specific_Up	16.8	24.57	21.99	16.22	42.82	31.32	53.06	41.02	53.5	29	48.05	62.57	95.54	21.99	41.02	53.5
Lamb3	2_Fructose_Specific_Up	118.94	197.91	116.07	152.72	269.27	160.05	278.31	406.2	254.43	442.15	419.84	423.03	370.53	118.94	269.27	419.84
Il2rg	2_Fructose_Specific_Up	17.52	22.32	15.1	28.65	17.59	43.66	33.95	29.85	29.56	47.58	56.18	51.44	56.91	17.52	29.85	51.44
4930458D05Rik	2_Fructose_Specific_Up	8.73	20.48	15.58	49.06	28.24	30.47	23.58	25.91	44.13	48.24	41.4	44.8	38.64	15.58	28.24	44.13
Nipa1	2_Fructose_Specific_Up	33.7	20.71	25.45	26.26	51.83	36.07	31.71	56.01	64.6	65.47	41.3	57.83	93.69	25.45	36.07	64.6
Sox6os	2_Fructose_Specific_Up	17.07	7.06	7.51	18.1	11.51	11.01	10.64	18.94	21.28	24.11	19.04	23.56	22.93	7.51	11.51	22.93
H2bc11	2_Fructose_Specific_Up	6.66	15.38	20.56	38.96	9.02	31.98	12.54	23.67	34.04	37.65	31.04	30.59	66.85	15.38	23.67	34.04
Gm13169	2_Fructose_Specific_Up	30.28	8.44	17.19	16.2	0	28.99	25.61	18.93	36.82	45.2	42.75	51.48	33.02	17.19	18.93	42.75
Nek2	2_Fructose_Specific_Up	62.15	48.79	65.1	45.85	86.08	65.62	64.06	131.03	111.24	141.62	162.28	146.18	165.34	62.15	65.62	146.18
Gm69171	2_Fructose_Specific_Up	10.03	7.69	15.77	24.48	27.06	18.75	16.03	18.14	24.32	22.22	28.08	23.1	45.18	10.03	18.75	24.32
Btk	2_Fructose_Specific_Up	5.99	6.85	10.3	4.44	10.02	12.54	14.25	8.8	15.46	17.98	19.62	34.11	17.56	6.85	10.02	17.98
H3c2	2_Fructose_Specific_Up	20.07	24.61	25.37	26.52	33.82	45.32	29.39	46.54	45.17	49.16	43.26	62.83	90.36	24.61	33.82	49.16
H2bc14	2_Fructose_Specific_Up	13.35	8.46	17.13	4.09	11.28	15.61	11.61	24.46	24.32	30.95	28.04	24.99	47.83	13.35	11.61	28.04
Gm71239	2_Fructose_Specific_Up	0	8.17	10.08	8.19	10.25	15.45	7.86	11.53	15.85	21.65	14.66	20.09	21.07	8.17	10.25	20.09
Flvcr2	2_Fructose_Specific_Up	80.89	46.03	86	72.7	110.41	63.52	137.4	179.06	96.56	222.73	144.57	158.78	197.04	80.89	110.41	158.78
Trim7	2_Fructose_Specific_Up	291.25	185.43	332.51	322.86	396.18	579.26	416.69	351.56	651.47	788.19	483.06	529.17	689.23	291.25	396.18	651.47
Gm47882	2_Fructose_Specific_Up	6.12	13.23	12.49	9.16	22.49	12.74	11.99	30.64	36.7	26.26	20.82	24.62	27.61	12.49	12.74	26.26
Arhgap44	2_Fructose_Specific_Up	12.65	8.55	8.31	9.47	15.16	10.74	13.22	19.24	20.97	13.68	18.74	22.38	28.51	8.55	13.22	20.97
Phf11b	2_Fructose_Specific_Up	20.17	14.59	15.12	18.24	15.78	32.89	22.99	19.72	30.57	37.09	30.51	32.2	48.12	15.12	19.72	32.2
Mthfr	2_Fructose_Specific_Up	154.36	170.03	201.78	171	156.51	170.75	169.7	209.06	166.82	442.38	760.65	312.44	322.31	170.03	170.75	322.31
Lgalsl	2_Fructose_Specific_Up	235.51	234.21	352.22	401.22	400.83	315.42	337.34	481.81	383.65	691.22	889.2	576.28	554.8	235.51	400.83	576.28
Xrcc3	2_Fructose_Specific_Up	32.47	48.74	64.93	88.62	156.54	52.23	46.45	62.07	123.99	92.53	86.18	135.68	104.83	48.74	62.07	104.83
Ciita	2_Fructose_Specific_Up	14.51	46.92	49.93	34.73	32.96	64.83	57.15	56.67	89.34	64.59	94.9	65.05	116.44	46.92	56.67	89.34
Tgtp2	2_Fructose_Specific_Up	94.25	48.78	77.39	70.21	87.86	152.39	94.86	86.21	151.21	125.73	192.49	77.67	220.51	77.39	87.86	151.21
Ulk4	2_Fructose_Specific_Up	18.28	11.61	7.9	19.84	14.33	14.47	9.49	12.28	19.07	22.27	20.87	22.75	25.33	11.61	14.33	22.27
Gm15535	2_Fructose_Specific_Up	24.36	15.11	16.19	32.07	26.82	26.78	14.7	24.02	30.21	38.52	51.24	27.07	28.53	16.19	26.78	30.21
Unc119	2_Fructose_Specific_Up	116.4	71.21	96.66	102.94	92.35	182.12	131.12	133.24	191.66	129.7	270.26	150.78	214.36	96.66	131.12	191.66
Ear2	2_Fructose_Specific_Up	20.1	45.35	49.4	50.89	36.07	92.27	39.98	63.89	68.8	75.46	69.93	78.43	126.12	45.35	50.89	75.46
Zfp982	2_Fructose_Specific_Up	158.55	138.3	171.23	157.54	226.26	178.5	154.23	289.3	264.89	337.03	260.15	419.85	296.05	158.55	178.5	296.05
Cd79b	2_Fructose_Specific_Up	20.32	14.16	13.15	14.29	31.79	26.03	19.6	12.71	31.75	35.57	26.12	19.76	33.93	14.16	19.6	31.75
Gstm2	2_Fructose_Specific_Up	756.07	479.42	404.55	596	834.93	642.53	764.69	891.51	1027.05	747.51	1076.13	993.54	1560.37	479.42	764.69	1027.05

## Sheet: Fructose Enhanced
Fructose Enhanced (n = 57) — Normalized Counts
		CD			HFD					HFSD					Group Medians
Gene	Category	CD4047tr	CD4008tr	CD4006tr	HFD4052tr	HFD4019tr	HFD4048tr	HFD4049tr	HFD4020tr	HFSD4053tr	HFSD4039tr	HFSD4038tr	HFSD4035tr	HFSD4044tr	CD_median	HFD_median	HFSD_median
Gm50337	0a_Fructose_Enhanced	0	0	0	6.66	7.61	13.52	11.24	6.18	32.76	17.22	13.56	10.61	12.87	0	7.61	13.56
Cyp2b9	0a_Fructose_Enhanced	26.93	7.67	53.64	1516.79	1237.19	165.37	1499.71	2062.76	1420.03	2236.66	1556.28	1931.14	2967.22	26.93	1499.71	1931.14
ENSMUSG00000141724	0a_Fructose_Enhanced	0	0	0	8.05	7.47	0.77	4.28	9.89	11.75	17.56	15.04	8.05	20.82	0	7.47	15.04
Gm61662	0a_Fructose_Enhanced	0	0	0.69	2.02	6.76	15.68	14.1	22.08	14.59	16.87	61.91	11.94	24.78	0	14.1	16.87
BC035947	0a_Fructose_Enhanced	0	0	0	6.11	0	16.45	8.88	7.95	10.45	12.66	16.71	12.02	13.6	0	7.95	12.66
Ly6d	0a_Fructose_Enhanced	6.7	4.61	3.43	61.04	13.53	82.11	26.64	152.23	72.97	57.95	162.71	189.11	308.53	4.61	61.04	162.71
Flacc1	0a_Fructose_Enhanced	0	0	3.2	15.83	24.08	25.35	27.75	32.24	55.98	37	6.99	49.61	50.39	0	25.35	49.61
Cyp2a22	0a_Fructose_Enhanced	39.25	9.17	25.45	236.78	261.35	63.54	462.3	366.02	249.05	558.5	355.7	353.61	965.52	25.45	261.35	355.7
Ldb3	0a_Fructose_Enhanced	0	1.47	0.66	13.42	6.47	6.76	12.64	14.35	3.99	27.14	10.25	22.83	35.91	0.66	12.64	22.83
Gsta13	0a_Fructose_Enhanced	0	11.52	25.39	109.64	135.19	65.7	71.77	182.91	311.18	274.21	124.79	209.98	509.72	11.52	109.64	274.21
Gm57031	0a_Fructose_Enhanced	3.57	0.82	2.5	39.15	9.63	21.99	13.03	8.27	22.5	23.96	51.04	23.19	35.23	2.5	13.03	23.96
Gm11695	0a_Fructose_Enhanced	11.63	2.36	3.69	23.3	8.65	5.73	53.3	49.96	33.59	123.96	20.52	26.1	84.8	3.69	23.3	33.59
Mab21l3	0a_Fructose_Enhanced	0	1.27	1.53	11.22	2.5	6.13	8.81	13.4	6.17	8.96	45.1	12.94	12.61	1.27	8.81	12.61
4932411K12Rik	0a_Fructose_Enhanced	0	0	2.03	5.15	2.66	4.96	8.43	14.63	16.58	17.99	9.88	16.46	17.52	0	5.15	16.58
Gm30692	0a_Fructose_Enhanced	8.33	0.3	10.48	47.21	23.5	51.6	20.49	58.18	44.21	81.74	94.28	51.04	79.45	8.33	47.21	79.45
Cdkn1a	0a_Fructose_Enhanced	13.23	35.44	108.21	659.51	183.88	183.21	227.36	585.17	199.72	1427.26	606.36	610.64	448.41	35.44	227.36	606.36
Ttc39aos1	0a_Fructose_Enhanced	2.74	7.77	2.24	11.52	16.52	35.19	65.61	16.71	86.1	26.18	36.7	20.94	94.46	2.74	16.71	36.7
Gm40923	0a_Fructose_Enhanced	13.6	5.06	1.51	28.43	20.39	29.15	27.65	37.11	58.11	37.37	102.36	44.7	44.85	5.06	28.43	44.85
Ifi27l2b	0a_Fructose_Enhanced	67.19	48.38	43.28	283.87	320.06	287.36	337.08	489.06	532.25	553.62	496.32	572.44	836.25	48.38	320.06	553.62
Rad51b	0a_Fructose_Enhanced	10.08	6.13	16.65	50.6	53.99	44.91	68.97	123.67	76.46	97.94	164.34	132.24	194.6	10.08	53.99	132.24
Mogat1	0a_Fructose_Enhanced	59.76	15.63	15.47	143.5	91.82	139.31	178.96	208.02	232.23	239.59	241.41	340.1	399.94	15.63	143.5	241.41
Gsta1	0a_Fructose_Enhanced	46.9	19.18	45.25	70.99	108.04	120.73	187.03	348.9	468.61	391.71	189.28	320.17	641.08	45.25	120.73	391.71
Ttc39a	0a_Fructose_Enhanced	9.07	11.79	6.79	16.32	22.24	109.31	91.9	41.44	165.06	54.01	73.88	64.07	119.3	9.07	41.44	73.88
Zfp423	0a_Fructose_Enhanced	36.09	4.13	8.98	35.89	25.6	54.25	39.48	54.78	84.21	82.71	85.91	92.82	86.24	8.98	39.48	85.91
A4gnt	0a_Fructose_Enhanced	16.85	0.77	3.44	10.1	29.29	46.26	40.53	13.41	81.97	33.74	16.82	43.15	66.81	3.44	29.29	43.15
Ubd	0a_Fructose_Enhanced	6.71	6.91	7.55	34.51	29.3	45.39	46.07	42.59	57.68	49.89	85.3	50.66	102.99	6.91	42.59	57.68
Slc22a27	0a_Fructose_Enhanced	36.4	14.33	22.97	91.7	83.48	66.64	145.41	137.18	172	198.03	251.4	150.7	274.04	22.97	91.7	198.03
Gm45086	0a_Fructose_Enhanced	8.8	7.3	4.7	27.09	8.64	25.02	54.21	44.64	22.99	56.09	96.42	54.21	87.34	7.3	27.09	56.09
Gm67791	0a_Fructose_Enhanced	27.58	13.96	6.95	49.47	48.48	41.3	57.61	82.07	52.59	94.71	227.8	156.38	117.35	13.96	49.47	117.35
Sirpb1b	0a_Fructose_Enhanced	2.23	0	2.27	14.16	0	9.71	9.29	7.37	15.16	15.76	15.49	4.3	16.28	2.23	9.29	15.49
Gm29012	0a_Fructose_Enhanced	5.91	2.02	2.51	17.96	20.42	15.35	18.15	11.69	28.12	21.24	22.8	29.61	21.8	2.51	17.96	22.8
Gm40683	0a_Fructose_Enhanced	10.1	10.74	3.44	42.47	33.8	35.27	36.17	48.91	47.94	60.05	78.7	58.79	50.25	10.1	36.17	58.79
Myom3	0a_Fructose_Enhanced	2.33	6.18	7.12	9.74	24.86	20.27	12.5	35.63	16.8	60.15	32.19	74.88	41.07	6.18	20.27	41.07
Gramd1b	0a_Fructose_Enhanced	17.93	26.55	50.31	187.41	113.6	128.33	83.17	199.55	221.46	207.37	139.87	222.69	307.6	26.55	128.33	221.46
Kbtbd11	0a_Fructose_Enhanced	30.45	7.5	14.91	37.82	36.81	92.16	79.87	67.86	172.18	54.59	71.3	48.16	171.1	14.91	67.86	71.3
ENSMUSG00000132436	0a_Fructose_Enhanced	9.05	7.53	2.91	6.69	20.31	16.09	24.56	13.29	43.52	21.25	53.83	29.95	28.73	7.53	16.09	29.95
Oip5	0a_Fructose_Enhanced	0	2.25	2.52	2.63	2.92	7.16	13.04	10.33	10.11	11.5	12.76	16.66	13.07	2.25	7.16	12.76
Gm51617	0a_Fructose_Enhanced	12.76	4.69	5.75	14.59	18.51	27.81	31.66	18.35	29.38	25.11	46.71	51.23	39.14	5.75	18.51	39.14
Niban2	0a_Fructose_Enhanced	85.83	49.89	65.18	202.49	156.2	273.42	272.08	154.73	361.22	223.96	410.9	225.39	411.71	65.18	202.49	361.22
Gm10680	0a_Fructose_Enhanced	10.23	9.42	14.91	37.49	23.01	44.84	34.83	29.24	59.09	30.52	99.36	34.9	70.72	10.23	34.83	59.09
Wfdc2	0a_Fructose_Enhanced	103	48	42.23	134.75	179.83	191.61	223.88	218.85	282.77	237.34	245.8	240.55	404.68	48	191.61	245.8
H1f5	0a_Fructose_Enhanced	16.75	16.14	8.23	36.63	33.82	46.92	42.63	47.33	57.68	44.47	51.7	55.35	91.19	16.14	42.63	55.35
Snhg18	0a_Fructose_Enhanced	36.3	14.61	8.07	27.39	20.24	31.75	42.57	52.74	56.08	61.57	65.91	56.82	76.24	14.61	31.75	61.57
Slc1a4	0a_Fructose_Enhanced	61.14	26.28	44.37	109.85	68.11	189.08	145.16	116.72	146.94	167.57	227.17	158.12	240.18	44.37	116.72	167.57
Cdcp1	0a_Fructose_Enhanced	97.36	52.27	56.07	191.88	186.01	175.75	158.38	238.34	196.27	422	166.42	329.92	300.29	56.07	186.01	300.29
A530020G20Rik	0a_Fructose_Enhanced	9.73	14.94	10.92	24.77	47.45	18.1	41.17	33.8	42.22	75.79	25.39	47.66	75.33	10.92	33.8	47.66
Ccr2	0a_Fructose_Enhanced	32.24	31.19	30.72	115.82	36.17	148.15	77.03	77.89	124.99	99.63	140.04	107.5	194.04	31.19	77.89	124.99
Gm66571	0a_Fructose_Enhanced	10.62	12.57	23.82	59.35	43.13	20.38	41.28	45.06	33.43	108.78	45.59	74.26	77.78	12.57	43.13	74.26
Anxa2	0a_Fructose_Enhanced	344.3	182.42	203.86	461.63	509.21	1028.98	537.93	740.07	835.73	440.75	1344.07	826.2	1241.71	203.86	537.93	835.73
Stx1b	0a_Fructose_Enhanced	46.73	37.21	28.08	46.63	87.65	119.57	91.76	133.14	89.57	96.12	216.29	172.92	126.85	37.21	91.76	126.85
Apoa4	0a_Fructose_Enhanced	9196.51	10505.2	6811.37	18381.5	20268.5	28537.7	21057.7	21420.3	32035.1	22423.4	51448.9	25294.2	30409.9	9196.51	21057.7	30409.9
Dlec1	0a_Fructose_Enhanced	22.5	33.63	35.42	42.85	83.49	53.82	85.66	72.18	116.24	97.59	139.89	105.58	131.38	33.63	72.18	116.24
Mybl1	0a_Fructose_Enhanced	22.79	19.14	21.05	62.59	27.07	43.45	72.9	30.8	54.42	59.96	106.34	45.1	97.17	21.05	43.45	59.96
Tubb2a	0a_Fructose_Enhanced	666.28	385.32	506.68	704.19	640.03	1799.08	996.61	1329.94	1311.01	1408.61	3266.92	1270.15	1682.26	506.68	996.61	1408.61
Impa2	0a_Fructose_Enhanced	32.65	44.1	38.31	39.09	61.36	115.68	88.1	129.1	57.59	142	163.01	125.77	166.09	38.31	88.1	142
Scd1	0a_Fructose_Enhanced	149832	282732	203178	383405	483094	391479	351259	581189	601080	827264	735221	623121	675203	203178	391479	675203
Sytl4	0a_Fructose_Enhanced	31.13	33.24	49.71	84.88	95.71	62.2	93.96	104.15	107.94	114.95	105.04	109.26	192.89	33.24	93.96	109.26

## Sheet: Fat Specific Up
Fat Specific Up (n = 26) — Normalized Counts
		CD			HFD					HFSD					Group Medians
Gene	Category	CD4047tr	CD4008tr	CD4006tr	HFD4052tr	HFD4019tr	HFD4048tr	HFD4049tr	HFD4020tr	HFSD4053tr	HFSD4039tr	HFSD4038tr	HFSD4035tr	HFSD4044tr	CD_median	HFD_median	HFSD_median
Sult1e1	6_Fat_Specific_Up	3.36	13.05	12.37	52.68	13.52	500.48	55.69	27.61	290.43	26.98	34.33	50.59	33	12.37	52.68	34.33
Gm34471	6_Fat_Specific_Up	0	0.51	4.53	18.63	27.05	13.64	8.12	3.09	9.15	5.78	9.72	3.88	10.22	0.51	13.64	9.15
Saa2	6_Fat_Specific_Up	283.57	143.67	173.24	20755.2	333.94	1279.88	667.25	958.6	986.05	1071.91	828.71	1065.34	1238.93	173.24	958.6	1065.34
Saa1	6_Fat_Specific_Up	668.61	416.21	393.77	36586.8	875.39	3332.11	1762.66	1958.69	2040.97	2728.73	2178.65	2618.17	2758.51	416.21	1958.69	2618.17
S100a8	6_Fat_Specific_Up	3.33	6.16	5.48	126.96	13.54	27.28	15.22	5.52	15.99	18.81	28.79	19.42	25.95	5.48	15.22	19.42
Rnf32	6_Fat_Specific_Up	0	3.12	3.05	19.95	10.87	9.4	22.99	5.94	19.57	5.1	3.13	10.21	5.85	3.05	10.87	5.85
Cercam	6_Fat_Specific_Up	0	1.87	3.91	14.77	7.32	18.12	7.87	17.84	6.21	8.22	6.16	5.22	9.51	1.87	14.77	6.21
Slfn4	6_Fat_Specific_Up	6.85	3.66	1.31	52.17	4.02	19.26	10.46	5.62	11.14	4.81	8.04	8.99	6.47	3.66	10.46	8.04
Obp2a	6_Fat_Specific_Up	36.86	15.37	9.61	87.49	45.09	150.15	23.98	81.24	38.22	52.56	52.46	53.5	16.45	15.37	81.24	52.46
Gm50433	6_Fat_Specific_Up	2.77	3	8.67	18.26	30.85	14.64	15.39	9.61	6.21	12.16	12.9	21.33	9.43	3	15.39	12.16
Ppbp	6_Fat_Specific_Up	10.08	14.59	11.68	249.42	22.54	45.41	21.24	13.41	24.32	22.93	34.31	26.69	24.05	11.68	22.54	24.32
F13a1	6_Fat_Specific_Up	16.16	6.51	7.33	77.91	6.23	39.73	18.62	21.21	10.88	13.34	24.62	12.25	27.88	7.33	21.21	13.34
Dkk4	6_Fat_Specific_Up	23.54	11.52	4.81	56.71	49.58	104.18	35.35	14.2	49.33	21.58	18.31	21.15	9.63	11.52	49.58	21.15
B430219N15Rik	6_Fat_Specific_Up	16.74	18.78	19.26	79.02	62.52	75.89	80.45	24.47	56.23	50.4	21.48	36.39	23.47	18.78	75.89	36.39
6330562C20Rik	6_Fat_Specific_Up	8.17	3.04	5.99	14.86	18.24	12.36	17.35	9.49	10.11	9.66	7.52	8.22	13.37	5.99	14.86	9.66
Cplane1	6_Fat_Specific_Up	69.5	135.37	178.24	481.25	211	536.36	447.52	258.24	278.47	236.09	285.18	253.8	196.99	135.37	447.52	253.8
Pde5a	6_Fat_Specific_Up	68.03	41.29	57.03	288.53	102.76	270.25	71.51	98.46	101.93	101.67	87.93	110.01	112.46	57.03	102.76	101.93
Slc7a11	6_Fat_Specific_Up	3.63	6.25	4.89	33.14	8.42	27.88	10.61	12.87	10.4	9.35	5.29	12.77	8.96	4.89	12.87	9.35
Prok1	6_Fat_Specific_Up	33.7	51.4	60.53	224.21	137.46	199.95	141.84	79.67	100.04	101.24	47.42	112.89	95.75	51.4	141.84	100.04
Kif22	6_Fat_Specific_Up	10.23	8.6	3.76	25.76	39.32	27.59	13.29	12.06	5.7	9.42	6.27	10.57	19.77	8.6	25.76	9.42
Sorl1	6_Fat_Specific_Up	85.23	49.45	46.77	124.78	66.74	141.78	196.92	178.77	109.54	85.28	85.38	85.5	108.72	49.45	141.78	85.5
Gm56656	6_Fat_Specific_Up	0	15.35	10.99	24.31	24.78	30.53	22.98	23.66	19.45	17.53	17.54	16.55	18.55	10.99	24.31	17.54
Gm65496	6_Fat_Specific_Up	23.53	15.36	12.37	28.38	47.33	50.9	44.22	24.45	34.05	18.88	20.59	23	16.5	15.36	44.22	20.59
B3galt1	6_Fat_Specific_Up	309.08	322.98	600.4	1752.15	716.65	827.25	660.32	544.91	621.41	739.75	349.29	604.49	599.96	322.98	716.65	604.49
Nrep	6_Fat_Specific_Up	311.01	294.13	474.85	818.56	760.15	1160.01	1002.15	402.4	785.43	498.93	160.67	555.31	531.92	311.01	818.56	531.92
Serpina3n	6_Fat_Specific_Up	6199.23	6641.01	5972.69	25989.8	8250.02	9739.74	9536.71	9647.26	8967.44	9311.6	7913.26	8657.12	9078.94	6199.23	9647.26	8967.44

## Sheet: Fructose Suppressed
Fructose Suppressed (n = 6) — Normalized Counts
		CD			HFD					HFSD					Group Medians
Gene	Category	CD4047tr	CD4008tr	CD4006tr	HFD4052tr	HFD4019tr	HFD4048tr	HFD4049tr	HFD4020tr	HFSD4053tr	HFSD4039tr	HFSD4038tr	HFSD4035tr	HFSD4044tr	CD_median	HFD_median	HFSD_median
Zfp968	0b_Fructose_Suppressed	0	0	0	0	767.25	34.83	0	431.73	298.85	0	136.61	0	204.81	0	34.83	136.61
Gm44911	0b_Fructose_Suppressed	0	0	0	145.95	54.07	181.55	109.68	63.07	91.67	51.22	44.19	48.76	45.32	0	109.68	48.76
Gm47761	0b_Fructose_Suppressed	3.4	23.25	19.44	731.77	586.58	234.83	535.3	543.54	149.39	110.13	338.85	167.65	600.79	19.44	543.54	167.65
Lcn2	0b_Fructose_Suppressed	33.36	16.07	15.72	2074.04	106.14	296.83	164.28	259.22	237.12	378.43	182.68	311.73	434.57	16.07	259.22	311.73
Gm42047	0b_Fructose_Suppressed	135.72	258.51	191.65	5244.11	4768.41	1777.41	3581.41	4142.28	1169.91	1043.19	2675.42	1406.05	4617.73	191.65	4142.28	1406.05
Anxa8	0b_Fructose_Suppressed	5.26	2.19	1.31	19.19	25.62	8.93	25.95	8.98	17.14	8.32	13.78	5.23	10.45	2.19	19.19	10.45

## Sheet: Strict Shared Down
Strict Shared Down (n = 156) — Normalized Counts
		CD			HFD					HFSD					Group Medians
Gene	Category	CD4047tr	CD4008tr	CD4006tr	HFD4052tr	HFD4019tr	HFD4048tr	HFD4049tr	HFD4020tr	HFSD4053tr	HFSD4039tr	HFSD4038tr	HFSD4035tr	HFSD4044tr	CD_median	HFD_median	HFSD_median
Sqle	3_Strict_Shared_Down	1059.48	1125.03	838.66	7.83	9.48	11.8	9.09	4.27	9.59	6	6.35	10.36	10.53	1059.48	9.09	9.59
Ttyh1	3_Strict_Shared_Down	34.67	75.34	76.76	1.5	6.7	4.66	5.23	6.48	4.13	4.01	5.12	1.36	8.16	75.34	5.23	4.13
Idi1	3_Strict_Shared_Down	5875.56	4593.87	3829.95	226.91	426.97	270.64	337.21	290.65	428.47	330.41	312.9	351.1	278.92	4593.87	290.65	330.41
Pcsk9	3_Strict_Shared_Down	1236.96	552.35	525.62	80.77	58.59	89.39	73.98	38.65	122.96	57.37	45.13	33.96	24.8	552.35	73.98	45.13
Ppp1r3g	3_Strict_Shared_Down	179.08	481.27	245.41	18.02	11.3	46.59	58.36	17.19	72.48	20.98	19.94	11.05	18.65	245.41	18.02	19.94
Cyp51	3_Strict_Shared_Down	4169.73	3740.87	3571.45	436.96	432.04	427.87	350.66	335.85	464.47	438.51	493.36	304.09	292.68	3740.87	427.87	438.51
Fdps	3_Strict_Shared_Down	8269.41	4893.97	5261.97	494.9	650.55	741.36	592.71	506.37	997.28	678.62	735.82	428.2	411.54	5261.97	592.71	678.62
Nr4a1	3_Strict_Shared_Down	47.3	188.25	33.22	19.96	20.57	18.65	18.32	8.33	13.84	22.19	7.03	7.74	11.38	47.3	18.65	11.38
Nsdhl	3_Strict_Shared_Down	1239.02	859.63	926.84	114.88	177.5	150.06	130.99	109.08	194.91	144.65	135.41	135.53	146.22	926.84	130.99	144.65
Pclo	3_Strict_Shared_Down	13.13	27.51	19.93	3.99	8.91	3.11	2.29	3.64	0	3.68	3.58	5.98	4.29	19.93	3.64	3.68
Gm14308	3_Strict_Shared_Down	91.8	30.65	26.4	0	6.34	16.55	11.51	2.78	4.91	0	13.41	22.8	4.84	30.65	6.34	4.91
Fabp5	3_Strict_Shared_Down	319.12	1136.76	396.94	110.48	115.51	134.57	67.45	144.1	109.61	111.47	115.95	112.86	129.44	396.94	115.51	112.86
Gm25587	3_Strict_Shared_Down	56.27	22.02	86.7	16.7	18.4	20.27	10.71	7.02	9.59	12.74	8.51	6.61	16.01	56.27	16.7	9.59
Aldoc	3_Strict_Shared_Down	247.32	192.13	244.45	17.9	28.49	69.57	61.1	41.79	79.24	46.73	49.96	30.93	23.11	244.45	41.79	46.73
Msmo1	3_Strict_Shared_Down	5272.03	2207.81	2328.19	517.77	605.69	746.89	779.15	509.36	930.92	835.72	434.17	591.53	516.93	2328.19	605.69	591.53
Rdh11	3_Strict_Shared_Down	2144.75	1422.98	1522.51	246.31	433.63	282.65	294.26	336.17	346.86	322.18	422.26	343.71	285.13	1522.51	294.26	343.71
Mvd	3_Strict_Shared_Down	273.3	106.17	93.6	54.43	27.11	39.28	32.73	41.91	33.28	30.43	28.99	25.37	37.25	106.17	39.28	30.43
Btbd19	3_Strict_Shared_Down	10.62	124.59	331.06	53.43	35.57	38.12	53.97	38.01	18.37	43.96	18.18	54.88	35.94	124.59	38.12	35.94
Ccdc168	3_Strict_Shared_Down	20.24	64.42	73.65	10.08	13.52	4.71	5.28	21.3	11.11	14.85	21.44	7.34	4.83	64.42	10.08	11.11
Tm7sf2	3_Strict_Shared_Down	2966.15	2935.74	2778.7	608.41	787.44	588.36	694.52	705.28	605.22	770.39	700.15	756.67	630.1	2935.74	694.52	700.15
Cyp26a1	3_Strict_Shared_Down	187.58	198.75	192.94	58.37	58.31	33.53	67.61	56.4	56.69	60.43	43.33	32.92	53.42	192.94	58.31	53.42
Gm37626	3_Strict_Shared_Down	13.49	11.51	24.08	8.07	2.25	3.14	2.64	2.37	6.25	2.7	5.36	5.51	2.07	13.49	2.64	5.36
Gm36180	3_Strict_Shared_Down	34.7	40.1	38.91	16.29	6.79	10.06	17.85	9.86	12.55	21.87	7.71	4.5	3.16	38.91	10.06	7.71
Gm33862	3_Strict_Shared_Down	26.93	69.84	74.26	26.29	18.03	17.24	19.41	27.61	18.06	19.57	14.52	15.62	13.77	69.84	19.41	15.62
Fmn1	3_Strict_Shared_Down	683.34	154.57	182.07	46.26	93.16	91.85	66.58	66.93	80.48	71.59	148.11	75.29	79.44	182.07	66.93	79.44
Gm63658	3_Strict_Shared_Down	13.48	69.05	34.39	28.28	6.76	10.98	7.05	14.99	9.03	18.22	7.65	11.02	11.02	34.39	10.98	11.02
Gm57434	3_Strict_Shared_Down	37.37	50.8	75.37	21.33	25.88	20.26	17.41	16.71	14.44	25.9	10.73	23.52	9.21	50.8	20.26	14.44
Gm25189	3_Strict_Shared_Down	112.59	37.2	57.34	33.4	11.5	35.1	17.84	17.16	21.9	27.51	17.8	10.39	18.66	57.34	17.84	18.66
Lss	3_Strict_Shared_Down	1297.39	873.06	1367.79	363.1	336.55	417.9	521.62	246.77	543.36	383.43	298.33	223.19	306.52	1297.39	363.1	306.52
Gm36264	3_Strict_Shared_Down	177.92	122.47	237.18	51.58	60.19	88.24	51.43	88.24	41.17	56.63	51.9	81.02	40.16	177.92	60.19	51.9
Snora15	3_Strict_Shared_Down	833.7	270.76	313.76	195.82	93.17	204.19	133.94	99.41	110.03	153.6	161.01	132.04	146.3	313.76	133.94	146.3
Snora44	3_Strict_Shared_Down	620.27	228.9	279.75	135.38	153.94	164.05	107.55	114.1	123.7	146.27	106.1	81.72	106.3	279.75	135.38	106.3
Gm32342	3_Strict_Shared_Down	87.33	102.43	93.68	26.37	18.93	17.06	35.86	33.26	33.82	39.21	25.02	24.95	22.75	93.68	26.37	25.02
Pmvk	3_Strict_Shared_Down	842.95	584.12	711.11	134.26	191.57	153.04	193.65	155.21	257.16	249.3	234.92	192.05	168.28	711.11	155.21	234.92
Gm22620	3_Strict_Shared_Down	267.38	70.13	75.05	50.01	20.94	63.24	27.04	13.21	41.45	48.5	40.8	31.33	46.46	75.05	27.04	41.45
Acmsd	3_Strict_Shared_Down	305.26	734.87	461.42	255.45	190.7	190.47	105.28	151.58	180.52	246.23	106.58	161.79	98.75	461.42	190.47	161.79
Hmgcr	3_Strict_Shared_Down	2403.71	1829.38	1931.75	1000.95	872.29	937.46	778.26	717.61	791.81	838.7	484.12	567.75	628.48	1931.75	872.29	628.48
Insig1	3_Strict_Shared_Down	9848.48	5841.44	5084.62	2193.98	2090.17	3623.02	2965.72	1971.04	3433.19	2335.92	2464.69	1309.61	1639.39	5841.44	2193.98	2335.92
Gm37195	3_Strict_Shared_Down	16.85	20.71	15.13	8.08	6.76	4.7	6.17	4.73	4.17	5.4	6.12	11.02	2.76	16.85	6.17	5.4
Gm24523	3_Strict_Shared_Down	140.5	62.53	82.68	43.75	18.62	64.07	21.77	15.54	32.05	37.72	29.83	21.84	30.72	82.68	21.77	30.72
Gm36749	3_Strict_Shared_Down	144.49	267.1	251.24	136.3	74.09	79.63	78.64	104.23	53.08	102.7	77.64	81.04	57.77	251.24	79.63	77.64
Slco2a1	3_Strict_Shared_Down	364.89	641.41	592.22	293.92	258.31	139.83	182.06	261.63	147.29	213.6	178.52	158.4	195.84	592.22	258.31	178.52
9430037G07Rik	3_Strict_Shared_Down	113.5	412.3	558.65	235.87	137.96	74.16	123.6	169.64	113.01	119.05	114.62	147.21	115.78	412.3	137.96	115.78
Sstr2	3_Strict_Shared_Down	6.31	22.03	15.13	2.42	8.08	8.33	2.11	6.16	4.63	7.86	5.09	5.35	5.16	15.13	6.16	5.16
Slco1a4	3_Strict_Shared_Down	1322.71	1774.7	3065.45	871.4	884.62	343.41	995.68	546.06	758.56	746.84	591.61	618.32	770.22	1774.7	871.4	746.84
Meg3	3_Strict_Shared_Down	10.3	23.05	17.85	9.62	7.77	7.39	5.38	6.51	4.46	6.61	6.41	6.16	7.23	17.85	7.39	6.41
Gm43410	3_Strict_Shared_Down	97.67	406.69	291.61	109.15	36.06	60.36	81.11	59.16	58.36	119.44	84.08	114.8	81.25	291.61	60.36	84.08
Dpy19l3	3_Strict_Shared_Down	873.45	420.25	224.89	218.98	182.58	179.25	144.66	121.04	176.59	117.83	222.65	216.67	127.48	420.25	179.25	176.59
Snord16a	3_Strict_Shared_Down	1902.2	859.01	964.42	464.67	498.4	682.93	338.41	458.19	427.04	518.34	407.22	322.39	471.53	964.42	464.67	427.04
Snord94	3_Strict_Shared_Down	12276	4139.27	4705.15	2918.33	2658.01	3601.48	2219.16	1827.74	2139.06	2809.02	2797.62	2371.62	2268.95	4705.15	2658.01	2371.62
Pdzk1ip1	3_Strict_Shared_Down	49.25	29.4	42.77	10.12	24.71	9.46	11.31	13.66	19	15.36	8.57	10.63	13.58	42.77	11.31	13.58
5330406M23Rik	3_Strict_Shared_Down	63.98	112.04	105.22	54.59	45.07	46.25	52.91	43.39	33.35	45.21	32.86	41.33	21.34	105.22	46.25	33.35
Mvk	3_Strict_Shared_Down	473.87	201.52	197.64	63.18	94.11	134.03	124.29	83.7	145.67	73.41	83.12	90.19	116.44	201.52	94.11	90.19
Gm24201	3_Strict_Shared_Down	154.38	61.92	106.72	27.02	32.77	50.88	28.47	47.39	38.32	38.5	42.48	25.69	40.91	106.72	32.77	38.5
Dhcr7	3_Strict_Shared_Down	1095.53	692	851.66	266.08	332.31	384.49	269.78	246.07	477.74	307.49	228	282.25	288.85	851.66	269.78	288.85
Gm25682	3_Strict_Shared_Down	86.1	28.09	55.3	20.87	25.3	14.04	24.97	15.6	18.48	20.13	19.35	16.99	20.66	55.3	20.87	19.35
Rad51c	3_Strict_Shared_Down	17.98	21.69	15.16	3.04	2.26	8.46	6.58	9.61	4.63	7.92	3.43	6.38	11.05	17.98	6.58	6.38
Snord8	3_Strict_Shared_Down	186.86	139.59	170.84	53.27	68.94	91.55	61.67	71.58	65.7	68.88	68.31	38.14	57.8	170.84	68.94	65.7
B930059L03Rik	3_Strict_Shared_Down	16.5	20.76	14.16	4.95	9.2	6.4	6.48	6.44	7.37	9.95	6.24	3	5.62	16.5	6.44	6.24
Col4a4	3_Strict_Shared_Down	18.15	20.61	27.25	3.1	5.2	4.22	16.23	7.28	4.81	7.79	7.65	11.67	11.72	20.61	5.2	7.79
Gm48203	3_Strict_Shared_Down	10.1	19.19	15.81	10.11	2.25	3.92	2.65	4.73	8.34	5.4	6.11	7.35	2.75	15.81	3.92	6.11
Snord15b	3_Strict_Shared_Down	18448.5	8392.8	9891.21	5265	5798.52	7555.7	4319.21	4073.9	3951.3	5438.15	5370.18	4152.02	3924.53	9891.21	5265	4152.02
Gm26330	3_Strict_Shared_Down	397.2	254.51	269.76	95.67	110.05	161.83	86.22	101.48	126.65	122.6	106.78	81.13	128.03	269.76	101.48	122.6
Gm24695	3_Strict_Shared_Down	23.45	10.93	11.07	3.96	4.71	4.2	4	2.35	5.64	5.69	4.75	3.75	5.11	11.07	4	5.11
Rny1	3_Strict_Shared_Down	2621.22	839.57	967.87	541.62	555.29	802.08	521.54	430.97	540.37	613.78	544.33	470.99	609.67	967.87	541.62	544.33
Gm55431	3_Strict_Shared_Down	1180.45	409.58	449.59	325.3	255.67	351.65	293.42	146.29	255.28	265.96	316.64	204.63	237.6	449.59	293.42	255.28
Gm23245	3_Strict_Shared_Down	1061.29	440.21	567.39	298.12	262.64	356.86	245.62	281.49	225.84	302.37	305.7	245.74	216.97	567.39	281.49	245.74
Gm24136	3_Strict_Shared_Down	36.42	24.3	32.77	16.7	11.5	19.49	12.49	9.36	9.58	14.76	12.38	4.72	15.33	32.77	12.49	12.38
Snord104	3_Strict_Shared_Down	508.94	188.68	170.16	114.15	86.9	117.78	151.92	115.17	166.75	95.04	60.49	61.27	158.63	188.68	115.17	95.04
Acss2	3_Strict_Shared_Down	6933.88	3948.29	5066.74	1561.1	1981.6	1832.27	1798.34	1647.54	2493.43	2261.86	1689.9	1942.34	1781.92	5066.74	1798.34	1942.34
1810008I18Rik	3_Strict_Shared_Down	3867.79	1954.56	2073.39	949.11	1273.04	1560.52	1101.88	765.29	1516.09	805.23	1201.6	820.31	723.34	2073.39	1101.88	820.31
Snora57	3_Strict_Shared_Down	441.73	215.6	236.02	119.05	131.68	163.12	99.92	134	115.43	141.76	100.37	91.81	109.22	236.02	131.68	109.22
3110045C21Rik	3_Strict_Shared_Down	72.41	18.07	15.9	7.47	11.08	6.85	9.33	7.75	13.19	9.62	9.42	13.3	11.99	18.07	7.75	11.99
Gm24830	3_Strict_Shared_Down	1605.41	646.12	1183.74	298.5	206.97	645.38	319.55	270	316.42	513.07	530.71	312.34	542.9	1183.74	298.5	513.07
Gm37621	3_Strict_Shared_Down	47.21	69.03	57.11	34.31	20.28	21.18	19.36	43.39	28.48	15.53	25.26	30.28	15.85	57.11	21.18	25.26
Bud13	3_Strict_Shared_Down	52.33	219.1	370.85	140.76	98.09	85.31	96.66	95.92	86.57	104.26	82.03	71.03	78.83	219.1	96.66	82.03
Ppargc1b	3_Strict_Shared_Down	152.89	277.74	177.68	37.26	138.13	120.93	105.66	61.25	101.57	77.73	66.25	59.33	92.09	177.68	105.66	77.73
Snord22	3_Strict_Shared_Down	25159.8	13418.5	15005.3	7670.94	9139.47	12512	6239.55	7350.77	5892.38	8230.57	8052.44	6297.63	6266.81	15005.3	7670.94	6297.63
Gulp1	3_Strict_Shared_Down	43.05	47.2	55.17	7.58	15.28	23.85	8.59	19.28	35.49	26.41	12.31	9.8	13.44	47.2	15.28	13.44
9030616G12Rik	3_Strict_Shared_Down	208.5	369.05	297.5	111.48	68.29	119.57	143.09	117.5	134.28	127.62	149.89	54.31	118.61	297.5	117.5	127.62
Pck1	3_Strict_Shared_Down	67876.5	94424.8	90350.4	56986.1	32831.5	28234	34937	42793.6	29184.3	54170	31477.9	25162.7	27589.7	90350.4	34937	29184.3
Hsd17b7	3_Strict_Shared_Down	2298	2345	1996.23	857.31	1040.86	879.43	817.94	852.74	989.44	870.01	881.16	889.63	768.24	2298	857.31	881.16
Snora34	3_Strict_Shared_Down	895.73	284.49	378.53	214.9	178.65	281.3	169.25	127.64	178.85	223.44	225.37	172.62	224.79	378.53	178.65	223.44
Fads1	3_Strict_Shared_Down	9862.84	10023.6	10563.9	3249.65	4312.27	2383.72	4379.33	2967.71	4371.65	4298.41	4061.12	4236.44	3423.91	10023.6	3249.65	4236.44
Snora28	3_Strict_Shared_Down	2351.37	846.84	1116.51	628.59	626.14	752.39	570.11	571.5	595.92	622.14	586.66	492.56	622.84	1116.51	626.14	595.92
Bag2	3_Strict_Shared_Down	93.37	55.89	47.39	10.36	21.16	18.88	27.99	32.53	16.6	24.76	21.65	31.57	26.03	55.89	21.16	24.76
Star	3_Strict_Shared_Down	65.75	69.79	22.43	24.08	14.33	25.56	23.8	18.24	18.22	15.56	19.46	21.16	25.48	65.75	23.8	19.46
Gm42777	3_Strict_Shared_Down	53.93	188.72	85.31	34.33	42.81	74.5	41.39	43.39	40.99	45.22	45.9	66.08	35.83	85.31	42.81	45.22
Snora47	3_Strict_Shared_Down	139.85	61.61	79	37.56	32.48	64.61	33.32	37.36	41.69	39.03	29.74	35.09	37.47	79	37.36	37.47
Gm52965	3_Strict_Shared_Down	97.57	210.33	135.42	95.13	56.34	86.19	66.22	58.37	75.73	74.2	48.1	54.23	61.91	135.42	66.22	61.91
Wdr97	3_Strict_Shared_Down	40.47	58.29	55.05	20.18	33.8	18.04	13.2	39.44	20.14	26.33	18.37	28.44	16.54	55.05	20.18	20.14
Gm25820	3_Strict_Shared_Down	526.63	250.46	276.71	179	158.87	219.05	147.93	127.35	143.84	161.27	137.62	117.91	151.64	276.71	158.87	143.84
Gm23238	3_Strict_Shared_Down	364.26	185.25	198.66	121.07	126.52	145.07	114.17	70.99	107.46	116.07	105.24	58.54	124.6	198.66	121.07	107.46
Gm25617	3_Strict_Shared_Down	190.68	71.68	72.35	29.17	27.94	58.53	36.58	19.42	42.73	48.5	39.25	42.74	51.64	72.35	29.17	42.74
Fdft1	3_Strict_Shared_Down	2499.84	1236.18	1369.08	573.62	592.63	780.95	923.65	482.12	976	816.3	645.09	557.66	609.4	1369.08	592.63	645.09
Cystm1	3_Strict_Shared_Down	69.35	100.27	116.24	37.73	30.66	48.16	48.02	41.14	45.91	37.34	53.56	34.66	39.56	100.27	41.14	39.56
Gm58466	3_Strict_Shared_Down	43.19	60.71	73.36	20.58	18.06	37.38	34.15	24.44	24.3	25.51	16.66	46.43	18.37	60.71	24.44	24.3
Gm23262	3_Strict_Shared_Down	8216.75	4291.79	5209.22	2805.44	2872.71	3300.53	2165.17	2460.42	2281.87	2944.71	2929.94	2170.29	2269.09	5209.22	2805.44	2281.87
Gm25099	3_Strict_Shared_Down	4630.41	1662.52	1739.01	1113.04	778.29	1398.93	1148.41	688.38	1267.2	1192.02	1059.54	737.55	1452.52	1739.01	1113.04	1192.02
Gm23297	3_Strict_Shared_Down	2056.19	944.58	1182.22	736.82	478.95	938.9	524.26	489.97	579.35	723.35	649.57	408.89	614.37	1182.22	524.26	614.37
Gm26505	3_Strict_Shared_Down	738.16	375.07	487.42	223.35	202.37	313.34	215.12	208.35	206.84	240.11	259.17	183.06	238.1	487.42	215.12	238.1
Gm23849	3_Strict_Shared_Down	289978	130856	135283	95764.9	41026.8	113080	70336.4	34453.9	76728.4	88738.9	89923.5	62715.9	80819.1	135283	70336.4	80819.1
Gm45294	3_Strict_Shared_Down	26.94	35.3	33.7	24.26	6.76	14.11	12.35	7.1	9.73	16.87	19.11	15.61	9.64	33.7	12.35	15.61
Gm25890	3_Strict_Shared_Down	8816.52	5707.42	5190.32	2747.07	2272.47	3824.4	2077.3	1727.45	2797.43	3183.06	3038.34	2142.59	2987.2	5707.42	2272.47	2987.2
Avpr1a	3_Strict_Shared_Down	121.29	186.44	257.95	38.39	130.7	58.02	64.33	84.4	43.07	88.41	152.16	72.53	57.85	186.44	64.33	72.53
Gm71569	3_Strict_Shared_Down	457.97	371.95	379.67	205.12	145.44	155.44	177.05	154.24	166.38	232.1	153.38	153.46	158.2	379.67	155.44	158.2
Gm22513	3_Strict_Shared_Down	200082	95808.2	110743	65552.7	70526.8	83105	53669.5	62383.3	56326.2	68685.2	64048.1	47963.5	58058.6	110743	65552.7	58058.6
Gm3787	3_Strict_Shared_Down	93.9	33.37	55.32	24.38	22.5	28.97	27.47	29.19	26.66	39.44	16.45	15.79	27.07	55.32	27.47	26.66
Snora16a	3_Strict_Shared_Down	176.75	92.87	132.67	62.56	41.81	72.59	60.38	45.89	61.05	61.27	66.59	35.1	59.05	132.67	60.38	61.05
Gm25818	3_Strict_Shared_Down	99.34	49.35	60.07	43.84	27.6	35.88	16.95	21.84	29.43	30.19	24.76	16.99	43.31	60.07	27.6	29.43
Sorbs3	3_Strict_Shared_Down	224.64	423.06	327.62	154.24	182.47	116.89	169.17	195.42	157.4	180.16	101.9	127.59	162.89	327.62	169.17	157.4
Gm25848	3_Strict_Shared_Down	352.09	100.28	121.29	93.94	115.68	84.09	65.25	97.41	76.48	83.34	71.74	91.85	84.52	121.29	93.94	83.34
Gm25813	3_Strict_Shared_Down	290.98	137.76	151.88	116.77	41.11	109.45	89.72	32.07	80.01	83.09	93.79	78.87	85.89	151.88	89.72	83.09
Gm29919	3_Strict_Shared_Down	205.86	307.33	226.26	66.6	104.18	149.05	112.94	95.64	127.11	72.72	134.57	114.64	105.24	226.26	104.18	114.64
Camk1d	3_Strict_Shared_Down	1417.06	1139.9	1348.58	269.32	898.56	250.29	434.51	645.19	491.92	544.6	860.17	515.8	485.2	1348.58	434.51	515.8
Gm13194	3_Strict_Shared_Down	19.91	30.68	37.78	6.19	11.3	13.99	7.21	9.44	11.79	16.75	16.71	13.02	11.52	30.68	9.44	13.02
Snord33	3_Strict_Shared_Down	177.78	67.2	75.52	61.48	33.06	52.16	47.05	49.31	63.18	40.48	36.36	22.52	64.85	75.52	49.31	40.48
Cdc42ep5	3_Strict_Shared_Down	12.74	45.89	85.64	13.47	23.52	16.34	17.63	20.2	22.81	20.84	27.68	23.58	21.5	45.89	17.63	22.81
Snora5c	3_Strict_Shared_Down	2224.35	1166.98	1525.41	873.79	775.79	975.18	637.08	717.95	685.63	853.77	759.9	615.73	748.61	1525.41	775.79	748.61
Gm75192	3_Strict_Shared_Down	20.21	44.5	37.83	4.04	11.27	14.9	17.62	14.2	18.06	14.17	14.53	17.44	18.6	37.83	14.2	17.44
Gm47508	3_Strict_Shared_Down	30.33	32.99	22.7	4.04	22.53	7.84	7.93	12.62	14.59	13.5	16.82	10.1	8.95	30.33	7.93	13.5
Gm23925	3_Strict_Shared_Down	3990.86	2172.46	2572.78	1379.27	1534.13	1754.29	1140.98	1431.1	1319.89	1536.52	1421.7	1007.61	1288.45	2572.78	1431.1	1319.89
Gm23686	3_Strict_Shared_Down	490.1	242.96	333.14	173.26	135.72	219.95	133.79	125.6	163.59	171.76	169.47	128.4	156.58	333.14	135.72	163.59
Gm23330	3_Strict_Shared_Down	877.54	480.6	645.81	369.48	276.04	435.22	263.12	268.37	289.53	337.49	337.39	240.75	294.51	645.81	276.04	294.51
Gm26110	3_Strict_Shared_Down	148.98	71.37	117.42	39.66	41.4	67.83	49.97	47.59	45.87	53.67	55.71	37.75	52.66	117.42	47.59	52.66
Snora41	3_Strict_Shared_Down	110.39	51.09	66.83	52.09	9.31	28.47	27	14.76	32.05	37.05	28.26	33.24	37.91	66.83	27	33.24
Rnu1a1	3_Strict_Shared_Down	739315	358451	406802	249575	215758	322214	199150	189688	221592	269523	248376	189280	231435	406802	215758	231435
Gm25053	3_Strict_Shared_Down	254.24	160.89	174.32	104.17	58.2	122.59	67.94	52.05	101.48	97.67	90.28	64.58	92.83	174.32	67.94	92.83
Snord17	3_Strict_Shared_Down	2754.15	1455.68	1602.65	894.69	872.32	1150.59	983.91	641.7	814.95	993.21	1035.62	745.64	901.48	1602.65	894.69	901.48
Agap2	3_Strict_Shared_Down	28.52	46.89	34.28	10.89	24.31	12.69	19.15	9.46	23.93	22.17	14.92	11.55	15.76	34.28	12.69	15.76
Rnu1b1	3_Strict_Shared_Down	188.71	86.56	96.94	77.24	25.3	100.58	46.4	39.79	46.56	61.04	68.09	47.19	59.33	96.94	46.4	59.33
Zfp941	3_Strict_Shared_Down	31.83	31	44.8	10.7	23.07	11.78	15.35	18.64	13.5	13.56	23.65	21.74	13.39	31.83	15.35	13.56
Pltp	3_Strict_Shared_Down	1456.18	1086.96	1525.15	629.46	544.76	542.95	574.35	631.64	670.15	576.57	605.88	587.77	751.55	1456.18	574.35	605.88
Sc5d	3_Strict_Shared_Down	15835.5	8593.62	8824.99	4896.47	5513.73	6381.61	5990.56	4282.54	6633.59	5039.04	5493.33	4544.98	4478.01	8824.99	5513.73	5039.04
Gm25202	3_Strict_Shared_Down	69.44	34.25	31.47	22.94	13.7	19.41	12.56	8.6	15.17	21.44	26.91	12.21	22.81	34.25	13.7	21.44
Slc25a27	3_Strict_Shared_Down	33.51	37.4	41.51	30.63	23.31	12.75	9.19	16.01	13.46	24.16	16.04	15.6	20.94	37.4	16.01	16.04
Pstpip2	3_Strict_Shared_Down	317.24	239.18	239.09	94.9	98.47	130.92	130.98	71.24	163.13	121.88	123.21	113.26	100.29	239.18	98.47	121.88
Hecw2	3_Strict_Shared_Down	592.98	232.42	324	208.05	174.77	102.25	187.91	227.77	179.09	242.3	168.94	146.21	144.61	324	187.91	168.94
Tbc1d8	3_Strict_Shared_Down	416.23	1205.38	750.21	500.87	451.07	248.07	220.94	523.08	398.11	593.4	294.67	322.5	294.8	750.21	451.07	322.5
Acacb	3_Strict_Shared_Down	1740.41	2506.69	2829.34	999.92	905.92	510.26	699.49	902.84	1221.67	1943.87	691.07	1118.73	689.4	2506.69	902.84	1118.73
Snora21	3_Strict_Shared_Down	2445.87	1114.71	1260.3	976.25	378.39	1088.8	539.68	305.01	711.23	954.51	839.37	598.6	755.22	1260.3	539.68	755.22
Gm23143	3_Strict_Shared_Down	165.61	86.85	110.44	49.56	51.89	81.82	22.87	45.84	45.65	60.38	60.93	47.65	69.99	110.44	49.56	60.38
Zfp395	3_Strict_Shared_Down	401.92	256.83	156.5	75.05	112.1	94.44	154.41	60.91	99.65	170.85	128.85	127	117.19	256.83	94.44	127
Rny3	3_Strict_Shared_Down	2500.69	924.42	940.27	610.59	800.17	779.64	684.15	648.12	782.34	679.82	656.82	486.63	922.07	940.27	684.15	679.82
Unc13b	3_Strict_Shared_Down	366.37	378.62	408.48	101.12	192.98	219.59	84.33	205.23	134.52	168.77	281.01	175.06	182.31	378.62	192.98	175.06
Gm23511	3_Strict_Shared_Down	112.59	65.29	52.57	48.01	18.4	48.36	33	27.3	29.43	44.28	44.11	29.27	31.32	65.29	33	31.32
Rpp40	3_Strict_Shared_Down	323	268.44	231.23	132.05	177.1	160.99	77.98	105.65	175.21	137.69	126.93	96.19	131.73	268.44	132.05	131.73
Gm44829	3_Strict_Shared_Down	26.96	47.57	39.9	26.26	15.77	17.25	15.86	22.09	20.84	21.6	20.65	22.03	15.16	39.9	17.25	20.84
Tmco6	3_Strict_Shared_Down	190.86	136.99	133.1	68.17	86.92	66.92	53.57	67.22	71.76	78.97	79.31	69.03	64.96	136.99	67.22	71.76
Csad	3_Strict_Shared_Down	5177.64	4191.07	3471.21	1504.68	1756.8	2915.56	1897.51	1618.7	1615.35	2170.74	3196.34	1383.9	2199.64	4191.07	1756.8	2170.74
Aph1b	3_Strict_Shared_Down	45.18	120.94	82.79	36.7	38.82	34.53	35.38	42.07	34.57	58.14	40.15	39.33	41.55	82.79	36.7	40.15
Gm26316	3_Strict_Shared_Down	2962.7	1346.43	1251.33	675.6	534.45	1224.96	697.14	416.07	802.88	912.61	1037.09	757.76	1074.98	1346.43	675.6	912.61
Gm5424	3_Strict_Shared_Down	70.6	53.75	54.98	18.23	42.82	28.2	21.22	28.4	36.83	35.75	19.07	31.27	21.31	54.98	28.2	31.27
Ankrd33b	3_Strict_Shared_Down	824.46	1547.16	1507.17	630.5	725.98	530.96	488.74	738.87	596.28	889.56	590.98	604.64	560.49	1507.17	630.5	596.28
Zfand4	3_Strict_Shared_Down	695.06	567.82	630.85	273.79	270.4	306.11	204.33	317.76	279.3	509.42	303.71	279	198.86	630.85	273.79	279.3
Smim1	3_Strict_Shared_Down	51.89	84.33	60	19.54	27.29	21.98	33.07	29.67	34.96	27.97	31.44	30.04	45.15	60	27.29	31.44

## Sheet: Fat Specific Down
Fat Specific Down (n = 18) — Normalized Counts
		CD			HFD					HFSD					Group Medians
Gene	Category	CD4047tr	CD4008tr	CD4006tr	HFD4052tr	HFD4019tr	HFD4048tr	HFD4049tr	HFD4020tr	HFSD4053tr	HFSD4039tr	HFSD4038tr	HFSD4035tr	HFSD4044tr	CD_median	HFD_median	HFSD_median
Srgap3	4_Fat_Specific_Down	39.84	11.13	70.72	2.99	8.35	3.25	22.29	7.09	16.18	15.63	19.6	12.04	17.82	39.84	7.09	16.18
Gm24871	4_Fat_Specific_Down	1990.74	704.05	580.84	497.67	150.94	583.96	380.26	187.24	533.49	565.82	476.36	322.08	658.2	704.05	380.26	533.49
Gm38230	4_Fat_Specific_Down	10.09	16.13	22	0	0	10.19	6.19	3.95	5.56	8.77	9.16	8.29	8.94	16.13	3.95	8.77
Gm22270	4_Fat_Specific_Down	408.12	104.47	95.08	93.76	34.92	127.34	52.26	24.08	90.8	117.88	113.05	70.28	105.9	104.47	52.26	105.9
Hmgcs1	4_Fat_Specific_Down	8006.93	3190.34	3316.19	1484.05	1698.49	1928.76	2027.91	1829.8	2285.89	2123.38	3874.87	2258.84	2336.67	3316.19	1829.8	2285.89
ENSMUSG00000137237	4_Fat_Specific_Down	10.13	14.17	14.7	3.54	6.51	4.77	3.09	8.15	9.71	9.5	6.25	5.61	9.41	14.17	4.77	9.41
Gm24313	4_Fat_Specific_Down	43.45	43.45	37.87	14.59	11.63	31.62	16.57	8.55	25.4	26.94	34.53	18.99	19.63	43.45	14.59	25.4
Gm37588	4_Fat_Specific_Down	10.11	29.16	30.95	16.17	11.27	10.98	7.93	12.62	13.2	14.85	19.11	19.28	17.22	29.16	11.27	17.22
Gm36435	4_Fat_Specific_Down	17.22	20.86	17.8	5.09	3.53	7.97	3.21	7.9	10.47	17.27	13.61	10.48	9.35	17.8	5.09	10.48
Lmntd2	4_Fat_Specific_Down	6.69	22.92	11.62	4.06	4.52	4.72	7.08	5.54	9.76	8.72	13.03	9.21	8.94	11.62	4.72	9.21
4833422C13Rik	4_Fat_Specific_Down	82.32	58.34	66.93	23.88	40.59	31.9	26.89	27.14	43.02	65.24	47.74	39.97	25.55	66.93	27.14	43.02
Gm37677	4_Fat_Specific_Down	33.73	52.15	47.49	14.12	24.78	21.18	26.4	21.3	33.34	32.4	23.73	42.19	33.09	47.49	21.3	33.09
Gm44861	4_Fat_Specific_Down	16.81	14.59	13.06	4.05	4.51	3.13	4.42	7.1	6.95	15.51	9.15	9.2	9.62	14.59	4.42	9.2
Snhg11	4_Fat_Specific_Down	87.94	96.65	117.9	30.59	46.14	44.88	57.01	39.19	70.65	81.11	78.73	72.81	62.57	96.65	44.88	72.81
Gm43807	4_Fat_Specific_Down	13.46	15.35	10.31	4.05	2.25	0.78	3.53	7.89	6.25	8.1	7.64	14.7	10.32	13.46	3.53	8.1
Ugt1a9	4_Fat_Specific_Down	1064.22	1048.21	1389.93	390.13	552.1	320.6	710.66	801.44	723.2	833.35	820.1	776.98	1275.1	1064.22	552.1	820.1
Ighm	4_Fat_Specific_Down	181.92	203.34	168.41	67.48	105.77	126.48	80.06	64.71	90.3	239.59	154.81	98.06	131.26	181.92	80.06	131.26
Gm17055	4_Fat_Specific_Down	4.96	17.36	18.07	2.97	2.21	1.15	1	1.55	14.8	2.98	48.05	0	14.07	17.36	1.55	14.07

## Sheet: Fructose Specific Down
Fructose Specific Down (n = 93) — Normalized Counts
		CD			HFD					HFSD					Group Medians
Gene	Category	CD4047tr	CD4008tr	CD4006tr	HFD4052tr	HFD4019tr	HFD4048tr	HFD4049tr	HFD4020tr	HFSD4053tr	HFSD4039tr	HFSD4038tr	HFSD4035tr	HFSD4044tr	CD_median	HFD_median	HFSD_median
Gm60198	5_Fructose_Specific_Down	0	35.29	25.43	0	9.01	14.1	5.29	0	0	0	0	0	0	25.43	5.29	0
Moxd1	5_Fructose_Specific_Down	26.96	527.02	5.5	10.1	0	894.57	0.88	2.37	2.78	0.67	8.41	0.92	0	26.96	2.37	0.92
Ywhaq-ps3	5_Fructose_Specific_Down	56.99	19.99	28.15	0	0	20.34	7.11	15.78	0	4.72	0	0	0	28.15	7.11	0
Tnfrsf25	5_Fructose_Specific_Down	22.02	12.15	7.44	1.29	2.88	0	7.19	2.74	1.7	1.1	0	0.59	0.44	12.15	2.74	0.59
A830082N09Rik	5_Fructose_Specific_Down	20.16	614.05	27.56	20.5	9.43	19.22	16.3	607.31	16.61	17.35	22.88	15.35	16.07	27.56	19.22	16.61
9130230L23Rik	5_Fructose_Specific_Down	7.81	11.3	25.74	5.79	1.48	3.47	8.91	7.03	2.68	1.96	3.33	0.33	0.45	11.3	5.79	1.96
Gm67990	5_Fructose_Specific_Down	18.89	21.51	27.2	7.98	34.2	6.83	5.59	3.11	4.43	3.03	0	4.15	1.36	21.51	6.83	3.03
Ccdc63	5_Fructose_Specific_Down	19.36	0.76	22.82	2	3.34	8.27	6.71	5.81	1.72	1	1.35	2.27	1.36	19.36	5.81	1.36
Gm63898	5_Fructose_Specific_Down	13.36	34.58	22.6	14.28	6.76	5.46	12.47	10.25	3.47	2.69	0	2.77	7.52	22.6	10.25	2.77
Msantd1	5_Fructose_Specific_Down	1.94	17.77	14.74	21.36	26.83	7.33	1.01	3.63	5.01	1.55	0.44	1.59	1.19	14.74	7.33	1.55
ENSMUSG00000128022	5_Fructose_Specific_Down	19.48	145.44	49.05	169.92	21.11	6.56	9.86	27.65	9.79	14.67	10.87	14.98	6.82	49.05	21.11	10.87
Gm38357	5_Fructose_Specific_Down	151.59	218.68	166.45	94.98	74.36	79.96	120.75	87.56	25.7	39.81	10.7	34.89	35.12	166.45	87.56	34.89
Ugt2b38	5_Fructose_Specific_Down	770.95	891.77	475.16	177.96	117.18	637.18	56.46	124.63	148.67	69.5	146.69	164.45	60.57	770.95	124.63	146.69
Gm53027	5_Fructose_Specific_Down	3.31	12.15	12.29	4.18	6.89	3.89	3.58	7.03	0.69	2.01	0.77	4.71	1.34	12.15	4.18	1.34
Noxred1	5_Fructose_Specific_Down	6.16	13.96	15.84	16.68	4.13	4.31	8.16	4.33	3.82	3.09	0	4.21	0.63	13.96	4.33	3.09
Igha	5_Fructose_Specific_Down	16.89	17.76	51.96	6.12	6.8	20.66	21.54	3.97	7.69	6.1	8.43	2.78	3.45	17.76	6.8	6.1
mt-Ti	5_Fructose_Specific_Down	10.22	16.24	7.75	0	5.98	3.29	2.73	4.66	0.73	4.28	3.09	2.45	0.77	10.22	3.29	2.45
Gm62510	5_Fructose_Specific_Down	177.16	13.84	6.17	34.7	54.12	19.53	26.73	20.51	13.2	7.41	12.9	26.81	5.47	13.84	26.73	12.9
E030018B13Rik	5_Fructose_Specific_Down	40.3	164.37	115.39	83.18	49.59	29.75	15.05	31.55	13.2	72.14	10.67	17.49	4.12	115.39	31.55	13.2
Rskr	5_Fructose_Specific_Down	8.21	28.52	30.71	7.07	11.52	21.13	6	9.5	6.12	7.56	9.98	2.94	3.54	28.52	9.5	6.12
AA986860	5_Fructose_Specific_Down	48.39	121.82	44.43	32.06	21.57	7.51	16.24	50.66	16.43	28.95	5.86	11.79	23.91	48.39	21.57	16.43
Serpina9	5_Fructose_Specific_Down	6.74	27.62	41.28	20.19	11.27	20.39	7.05	11.04	4.17	4.05	3.06	19.27	2.76	27.62	11.27	4.05
Gm71818	5_Fructose_Specific_Down	15.22	22.65	21.81	11.17	2.05	7.52	14.15	6.66	1.9	5.52	2.07	9.27	7.08	21.81	7.52	5.52
Gm17971	5_Fructose_Specific_Down	46.94	49.18	48.05	28.46	24.8	41.46	40.81	21.3	18.07	12.13	5.33	14.75	10.98	48.05	28.46	12.13
Hsd3b5	5_Fructose_Specific_Down	4801.29	3136.4	2800.68	1600.87	3326.38	4875.11	1967.09	1761.42	1115.1	491.78	908.63	1626.92	490.52	3136.4	1967.09	908.63
Wasf1	5_Fructose_Specific_Down	13.48	4.6	12.38	2.02	2.25	3.14	6.17	3.16	2.08	2.02	2.29	2.75	3.44	12.38	3.14	2.29
Epop	5_Fructose_Specific_Down	30.31	58.32	48.83	24.25	31.55	25.09	15.87	17.35	15.28	22.27	9.94	4.59	13.08	48.83	24.25	13.08
Sik1	5_Fructose_Specific_Down	378.58	672.53	568.6	458.98	168.51	319.61	341.31	118.91	193.08	244.77	90.32	89.66	141.31	568.6	319.61	141.31
Gm11737	5_Fructose_Specific_Down	3.33	12.31	10.28	6.15	11.28	7.8	5.37	5.52	3.47	3.36	1.51	1.85	3.41	10.28	6.15	3.36
C8b	5_Fructose_Specific_Down	7895.41	10189.6	7884.94	4825.7	4459.2	6407.7	3007.98	3405.22	2338.77	2548.17	2730.75	2843.05	1795.87	7895.41	4459.2	2548.17
Gm59577	5_Fructose_Specific_Down	13.38	10.77	13.71	4.08	6.76	5.47	6.23	10.25	0.69	2.69	6.07	3.7	4.79	13.38	6.23	3.7
Gm45872	5_Fructose_Specific_Down	10.09	19.19	17.19	4.05	11.27	8.62	14.12	3.16	6.25	7.42	3.82	4.6	1.38	17.19	8.62	4.6
Selenbp2	5_Fructose_Specific_Down	6846.31	14284.2	9942.81	2203.73	5053.63	13452.6	2005.14	5881.7	4449.66	2352.41	2515.62	4327.22	1949	9942.81	5053.63	2515.62
Gm17530	5_Fructose_Specific_Down	12.56	10.88	26.43	9.66	19.14	10.29	7.59	7.44	5.89	6.34	6.42	5.24	1.29	12.56	9.66	5.89
Mm2pr	5_Fructose_Specific_Down	30.09	22.93	23.93	19.3	11.22	13.52	11.45	10.99	6.92	8.05	4.64	11.1	6.54	23.93	11.45	6.92
Gm36789	5_Fructose_Specific_Down	9.01	23.45	15.95	16.78	0	13.62	6.3	7.17	5.05	6.09	4.09	6.56	4.41	15.95	7.17	5.05
Dnase1l2	5_Fructose_Specific_Down	15.86	19.06	19.96	11.41	9.46	11.22	10.64	10.35	6.76	3.07	8.32	4.99	6.04	19.06	10.64	6.04
Gm70376	5_Fructose_Specific_Down	44.05	15.81	18.55	11.56	11.85	5.78	11.7	14.48	4.34	13.52	1.65	8.59	8.23	18.55	11.7	8.23
Ltbp3	5_Fructose_Specific_Down	129.19	34.77	42.54	31.82	34.67	15.24	24.55	21.93	25	15.25	18.44	12.51	12.52	42.54	24.55	15.25
Slc15a2	5_Fructose_Specific_Down	235.09	102.43	291.54	107.63	52.7	31.66	111.51	184.33	62.27	87.39	39.87	78.22	57.12	235.09	107.63	62.27
Fst	5_Fructose_Specific_Down	20.51	101.7	66.35	51.98	8.01	53.58	14.98	30.93	20.09	13.97	26.55	19.4	21.29	66.35	30.93	20.09
Pfkfb3	5_Fructose_Specific_Down	368.55	421.71	713.86	296.12	359.41	337	335.34	475.31	139.16	172.55	108.73	209.4	164.61	421.71	337	164.61
BC021767	5_Fructose_Specific_Down	81.54	134.69	83.18	42.22	63.42	98.76	31.1	48.31	41.2	24.98	18.62	50.17	25.04	83.18	48.31	25.04
Gm29438	5_Fructose_Specific_Down	37.06	52.94	81.85	20.21	36.05	35.28	32.61	29.19	18.76	29.69	11.47	16.53	19.28	52.94	32.61	18.76
Gapdhrt	5_Fructose_Specific_Down	158.18	172.69	205.57	78.9	85.64	188.85	60.9	89.92	63.92	81.63	44.3	59.73	39.91	172.69	85.64	59.73
Gm39583	5_Fructose_Specific_Down	12.13	45.43	71.22	61.44	50.28	32.2	9.32	33.01	17.22	18.1	5.53	24.37	8.04	45.43	33.01	17.22
Gm30107	5_Fructose_Specific_Down	55.13	179.96	78.32	66.79	64.21	61.53	39.66	42.66	36.72	23.01	24.9	71.1	19.29	78.32	61.53	24.9
Gm43598	5_Fructose_Specific_Down	16.84	16.88	14.44	2.02	11.27	7.06	6.17	12.62	5.56	8.77	6.88	1.84	2.75	16.84	7.06	5.56
Snora62	5_Fructose_Specific_Down	53.14	16.7	15.73	14.62	13.86	15.68	12.39	7.01	11.55	10.75	7.78	3.79	7.28	16.7	13.86	7.78
Gm74637	5_Fructose_Specific_Down	172.08	36.52	36.53	44.44	36.42	47.58	43.01	40.48	35.01	43.42	14.46	21.03	15.65	36.53	43.01	21.03
Gm47814	5_Fructose_Specific_Down	32.64	39.6	32.7	10.99	29.33	19.84	23.65	13.41	11.06	12.22	14.94	12.54	8.71	32.7	19.84	12.22
Gm67885	5_Fructose_Specific_Down	16.73	19.22	19.89	14.27	13.53	12.5	2.67	5.52	4.86	10.1	5.31	9.24	2.74	19.22	12.5	5.31
Gm37962	5_Fructose_Specific_Down	3.37	18.42	13.75	14.15	2.25	10.19	11.47	10.25	5.56	4.72	4.59	5.51	2.75	13.75	10.25	4.72
Gm56821	5_Fructose_Specific_Down	160.2	270.33	235.4	129.99	131.33	172.24	95.52	66.11	98.64	63.12	51.63	118.3	50.23	235.4	129.99	63.12
Gm63893	5_Fructose_Specific_Down	16.8	11.52	20.61	20.28	15.78	3.91	11.5	12.62	3.47	7.42	3.81	9.2	4.12	16.8	12.62	4.12
Gm45410	5_Fructose_Specific_Down	30.24	29.18	17.17	24.33	20.29	10.96	10.62	13.41	6.95	12.14	9.91	6.44	6.18	29.18	13.41	6.95
Gm68195	5_Fructose_Specific_Down	26.86	29.96	20.6	16.23	6.76	14.09	8.85	24.45	6.95	12.81	4.57	11.05	8.93	26.86	14.09	8.93
Gm62524	5_Fructose_Specific_Down	26.72	67.68	33.59	16.35	22.55	28.11	16.95	26.82	12.51	18.85	14.41	19.42	14.36	33.59	22.55	14.41
Prss8	5_Fructose_Specific_Down	97.63	52.95	69.45	22.25	13.52	89.34	44.99	18.14	52.8	18.22	19.1	14.7	22.71	69.45	22.25	19.1
Mup7	5_Fructose_Specific_Down	651979	650677	346351	268366	334495	663665	159324	266210	195042	241120	171514	283290	85394.2	650677	268366	195042
Gm72879	5_Fructose_Specific_Down	380.79	838.55	377.67	1086.68	392.08	290.11	317.15	377.85	229.94	276.03	84.13	212.96	153.61	380.79	377.85	212.96
Cyp7b1	5_Fructose_Specific_Down	7957.84	8398.79	6472.28	4051.04	4148.63	8395.92	2715.78	3648.29	3272.8	2098.55	3132.04	3493.75	1740.49	7957.84	4051.04	3132.04
9930024M15Rik	5_Fructose_Specific_Down	23.58	32.23	26.83	16.16	22.53	14.11	11.46	16.57	8.34	14.85	6.88	15.61	8.26	26.83	16.16	8.34
Gm66826	5_Fructose_Specific_Down	57.15	141.28	75.59	56.73	67.61	64.22	67.18	58.37	47.25	39.12	38.14	29.44	33	75.59	64.22	38.14
Bmf	5_Fructose_Specific_Down	510.48	418.54	317.81	331.7	286.3	362.04	232.74	168.17	264.16	156.49	140.66	110.25	147.22	418.54	286.3	147.22
Dact1	5_Fructose_Specific_Down	81.66	112.15	164.49	75.44	104.81	56.99	59.2	76.71	51.13	51.19	44.18	58.7	46.63	112.15	75.44	51.13
Il12rb1	5_Fructose_Specific_Down	26.14	19.11	30.81	20.5	15.3	15.72	11.11	14.89	8.54	10.6	11.87	13.64	7.8	26.14	15.3	10.6
Egfr	5_Fructose_Specific_Down	15032.4	22900.7	30238.6	17694.6	15686	16439.8	9590.57	14546	9977.75	8051.57	7159.74	14853.3	6811.91	22900.7	15686	8051.57
Creld2	5_Fructose_Specific_Down	662.53	1801.05	517.55	1514.73	570.2	485.69	507.99	691.79	462.73	398.64	482.34	332.87	392.68	662.53	570.2	398.64
Gm32064	5_Fructose_Specific_Down	39.55	27.32	27.72	33.97	13.24	20.04	19.53	15.29	18.37	9.41	11.9	12.35	11.52	27.72	19.53	11.9
Slc25a25	5_Fructose_Specific_Down	4848.3	7063.32	9002.13	4971.54	4193.57	4443.67	4642.58	4009.32	2012.56	4320.49	2889.36	2821.93	2725.24	7063.32	4443.67	2821.93
Cadm4	5_Fructose_Specific_Down	104.4	173.42	171.25	115.22	101.41	119.93	67.01	70.2	67.39	67.48	74.9	59.7	57.14	171.25	101.41	67.39
Slc38a2	5_Fructose_Specific_Down	5034.41	6682.29	6281.3	5358.68	3657.1	2264.7	2806.76	4208.17	2161.09	4801.44	1844.96	1873.28	2037.31	6281.3	3657.1	2037.31
Arl4d	5_Fructose_Specific_Down	1052.69	621.84	547.11	404.98	588.22	371.32	538.88	551.38	425.21	492.4	251.1	211.48	202.88	621.84	538.88	251.1
Cyp1a2	5_Fructose_Specific_Down	6239.2	4824.13	5890.63	3411.07	3489.18	3709.59	3545.1	3923.25	3654.8	1972.57	1598.82	2760.94	2178.15	5890.63	3545.1	2178.15
Mup12	5_Fructose_Specific_Down	14805	10770.4	5690.67	8234.65	7163.6	11843.6	4323.53	5631.19	5669.71	5281.17	3383.11	5672.2	2474.45	10770.4	7163.6	5281.17
Bmp10	5_Fructose_Specific_Down	141.6	93.58	89.45	82.76	58.58	54.9	71.31	59.16	59.74	47.25	41.32	45.88	30.32	93.58	59.16	45.88
Rnase4	5_Fructose_Specific_Down	21090.3	17051.9	16320.3	17457.2	12342	9479.92	9637.33	8928.87	7638.88	7090.62	6431.4	10365.6	7806.48	17051.9	9637.33	7638.88
Maff	5_Fructose_Specific_Down	217.38	192.91	139.87	147.33	85.96	114.15	122.33	103.47	120.13	73.38	46.82	78.18	73.55	192.91	114.15	73.55
Pim3	5_Fructose_Specific_Down	1866.11	3426.06	2520.95	2590.66	1876.61	1184.2	1489.8	1904.4	1036.42	2327.65	791.3	816.6	871.4	2520.95	1876.61	871.4
Wdfy4	5_Fructose_Specific_Down	230.28	180.4	148.26	123.83	133.18	131.13	160.49	142.19	101.78	69.89	62.83	35.72	144.55	180.4	133.18	69.89
Mup1	5_Fructose_Specific_Down	43292.4	35890.5	16509.4	26099.2	24138.2	41469.4	13982.2	17153.2	16401.6	16817.6	13220.8	18249.7	7351.16	35890.5	24138.2	16401.6
Ncor2	5_Fructose_Specific_Down	157.65	164.9	343.92	161.86	104.48	159.78	204.43	167.77	103.85	87.41	55.18	102.63	167.7	164.9	161.86	102.63
Noct	5_Fructose_Specific_Down	1809.53	2231.76	2041.68	1753.76	1369.1	918.03	1725.35	1655.04	1067.96	1131.77	578.62	1172.71	734.44	2041.68	1655.04	1067.96
Kif24	5_Fructose_Specific_Down	38.1	59.32	55.44	46.82	40.96	46.91	38.93	28.03	20.24	19.24	31.98	29.96	23.96	55.44	40.96	23.96
Chlsn	5_Fructose_Specific_Down	66.89	109.46	52.65	78.32	39.56	86.31	41.06	51.06	48.11	18.04	18.61	54.39	38.78	66.89	51.06	38.78
Gm38034	5_Fructose_Specific_Down	87.55	153.48	134.79	93	119.43	90.92	124.34	100.97	49.33	103.24	39.74	63.38	41.99	134.79	100.97	49.33
Coq10b	5_Fructose_Specific_Down	1866.2	1717.23	1632.11	1556.11	1393.9	1413.97	1429.99	944.13	1353.09	914.49	385.56	700.85	697.28	1717.23	1413.97	700.85
Kcnk5	5_Fructose_Specific_Down	1635.78	1797.16	832.08	1049.31	1067.19	911.56	1008.57	1303.26	926.43	1233.69	415.41	355.65	471.89	1635.78	1049.31	471.89
Gm43813	5_Fructose_Specific_Down	23.33	23.93	30.3	25.92	12.4	21.06	19.38	20.26	11.47	16.1	11.23	16.83	9.48	23.93	20.26	11.47
Gm53019	5_Fructose_Specific_Down	598.47	665.03	1194.75	647.64	864.27	714.74	636.45	528.63	464.73	390.66	309.46	598.19	240.7	665.03	647.64	390.66
Ang	5_Fructose_Specific_Down	1555.94	1926.75	1712.31	2003.41	1475.83	942.91	1043.07	1086.7	739.13	849.16	621.16	1191.28	897.23	1712.31	1086.7	849.16
Gm14421	5_Fructose_Specific_Down	47.14	138.14	154.04	84.93	114.93	72.89	101.44	96.24	55.58	66.8	45.08	61.55	67.46	138.14	96.24	61.55

## Sheet: All_716_genes
All 716 Classified DEGs — Normalized Counts
		CD			HFD					HFSD					Group Medians
Gene	Category	CD4047tr	CD4008tr	CD4006tr	HFD4052tr	HFD4019tr	HFD4048tr	HFD4049tr	HFD4020tr	HFSD4053tr	HFSD4039tr	HFSD4038tr	HFSD4035tr	HFSD4044tr	CD_median	HFD_median	HFSD_median
Gm50337	0a_Fructose_Enhanced	0	0	0	6.66	7.61	13.52	11.24	6.18	32.76	17.22	13.56	10.61	12.87	0	7.61	13.56
Cyp2b9	0a_Fructose_Enhanced	26.93	7.67	53.64	1516.79	1237.19	165.37	1499.71	2062.76	1420.03	2236.66	1556.28	1931.14	2967.22	26.93	1499.71	1931.14
ENSMUSG00000141724	0a_Fructose_Enhanced	0	0	0	8.05	7.47	0.77	4.28	9.89	11.75	17.56	15.04	8.05	20.82	0	7.47	15.04
Gm61662	0a_Fructose_Enhanced	0	0	0.69	2.02	6.76	15.68	14.1	22.08	14.59	16.87	61.91	11.94	24.78	0	14.1	16.87
BC035947	0a_Fructose_Enhanced	0	0	0	6.11	0	16.45	8.88	7.95	10.45	12.66	16.71	12.02	13.6	0	7.95	12.66
Ly6d	0a_Fructose_Enhanced	6.7	4.61	3.43	61.04	13.53	82.11	26.64	152.23	72.97	57.95	162.71	189.11	308.53	4.61	61.04	162.71
Flacc1	0a_Fructose_Enhanced	0	0	3.2	15.83	24.08	25.35	27.75	32.24	55.98	37	6.99	49.61	50.39	0	25.35	49.61
Cyp2a22	0a_Fructose_Enhanced	39.25	9.17	25.45	236.78	261.35	63.54	462.3	366.02	249.05	558.5	355.7	353.61	965.52	25.45	261.35	355.7
Ldb3	0a_Fructose_Enhanced	0	1.47	0.66	13.42	6.47	6.76	12.64	14.35	3.99	27.14	10.25	22.83	35.91	0.66	12.64	22.83
Gsta13	0a_Fructose_Enhanced	0	11.52	25.39	109.64	135.19	65.7	71.77	182.91	311.18	274.21	124.79	209.98	509.72	11.52	109.64	274.21
Gm57031	0a_Fructose_Enhanced	3.57	0.82	2.5	39.15	9.63	21.99	13.03	8.27	22.5	23.96	51.04	23.19	35.23	2.5	13.03	23.96
Gm11695	0a_Fructose_Enhanced	11.63	2.36	3.69	23.3	8.65	5.73	53.3	49.96	33.59	123.96	20.52	26.1	84.8	3.69	23.3	33.59
Mab21l3	0a_Fructose_Enhanced	0	1.27	1.53	11.22	2.5	6.13	8.81	13.4	6.17	8.96	45.1	12.94	12.61	1.27	8.81	12.61
4932411K12Rik	0a_Fructose_Enhanced	0	0	2.03	5.15	2.66	4.96	8.43	14.63	16.58	17.99	9.88	16.46	17.52	0	5.15	16.58
Gm30692	0a_Fructose_Enhanced	8.33	0.3	10.48	47.21	23.5	51.6	20.49	58.18	44.21	81.74	94.28	51.04	79.45	8.33	47.21	79.45
Cdkn1a	0a_Fructose_Enhanced	13.23	35.44	108.21	659.51	183.88	183.21	227.36	585.17	199.72	1427.26	606.36	610.64	448.41	35.44	227.36	606.36
Ttc39aos1	0a_Fructose_Enhanced	2.74	7.77	2.24	11.52	16.52	35.19	65.61	16.71	86.1	26.18	36.7	20.94	94.46	2.74	16.71	36.7
Gm40923	0a_Fructose_Enhanced	13.6	5.06	1.51	28.43	20.39	29.15	27.65	37.11	58.11	37.37	102.36	44.7	44.85	5.06	28.43	44.85
Ifi27l2b	0a_Fructose_Enhanced	67.19	48.38	43.28	283.87	320.06	287.36	337.08	489.06	532.25	553.62	496.32	572.44	836.25	48.38	320.06	553.62
Rad51b	0a_Fructose_Enhanced	10.08	6.13	16.65	50.6	53.99	44.91	68.97	123.67	76.46	97.94	164.34	132.24	194.6	10.08	53.99	132.24
Mogat1	0a_Fructose_Enhanced	59.76	15.63	15.47	143.5	91.82	139.31	178.96	208.02	232.23	239.59	241.41	340.1	399.94	15.63	143.5	241.41
Gsta1	0a_Fructose_Enhanced	46.9	19.18	45.25	70.99	108.04	120.73	187.03	348.9	468.61	391.71	189.28	320.17	641.08	45.25	120.73	391.71
Ttc39a	0a_Fructose_Enhanced	9.07	11.79	6.79	16.32	22.24	109.31	91.9	41.44	165.06	54.01	73.88	64.07	119.3	9.07	41.44	73.88
Zfp423	0a_Fructose_Enhanced	36.09	4.13	8.98	35.89	25.6	54.25	39.48	54.78	84.21	82.71	85.91	92.82	86.24	8.98	39.48	85.91
A4gnt	0a_Fructose_Enhanced	16.85	0.77	3.44	10.1	29.29	46.26	40.53	13.41	81.97	33.74	16.82	43.15	66.81	3.44	29.29	43.15
Ubd	0a_Fructose_Enhanced	6.71	6.91	7.55	34.51	29.3	45.39	46.07	42.59	57.68	49.89	85.3	50.66	102.99	6.91	42.59	57.68
Slc22a27	0a_Fructose_Enhanced	36.4	14.33	22.97	91.7	83.48	66.64	145.41	137.18	172	198.03	251.4	150.7	274.04	22.97	91.7	198.03
Gm45086	0a_Fructose_Enhanced	8.8	7.3	4.7	27.09	8.64	25.02	54.21	44.64	22.99	56.09	96.42	54.21	87.34	7.3	27.09	56.09
Gm67791	0a_Fructose_Enhanced	27.58	13.96	6.95	49.47	48.48	41.3	57.61	82.07	52.59	94.71	227.8	156.38	117.35	13.96	49.47	117.35
Sirpb1b	0a_Fructose_Enhanced	2.23	0	2.27	14.16	0	9.71	9.29	7.37	15.16	15.76	15.49	4.3	16.28	2.23	9.29	15.49
Gm29012	0a_Fructose_Enhanced	5.91	2.02	2.51	17.96	20.42	15.35	18.15	11.69	28.12	21.24	22.8	29.61	21.8	2.51	17.96	22.8
Gm40683	0a_Fructose_Enhanced	10.1	10.74	3.44	42.47	33.8	35.27	36.17	48.91	47.94	60.05	78.7	58.79	50.25	10.1	36.17	58.79
Myom3	0a_Fructose_Enhanced	2.33	6.18	7.12	9.74	24.86	20.27	12.5	35.63	16.8	60.15	32.19	74.88	41.07	6.18	20.27	41.07
Gramd1b	0a_Fructose_Enhanced	17.93	26.55	50.31	187.41	113.6	128.33	83.17	199.55	221.46	207.37	139.87	222.69	307.6	26.55	128.33	221.46
Kbtbd11	0a_Fructose_Enhanced	30.45	7.5	14.91	37.82	36.81	92.16	79.87	67.86	172.18	54.59	71.3	48.16	171.1	14.91	67.86	71.3
ENSMUSG00000132436	0a_Fructose_Enhanced	9.05	7.53	2.91	6.69	20.31	16.09	24.56	13.29	43.52	21.25	53.83	29.95	28.73	7.53	16.09	29.95
Oip5	0a_Fructose_Enhanced	0	2.25	2.52	2.63	2.92	7.16	13.04	10.33	10.11	11.5	12.76	16.66	13.07	2.25	7.16	12.76
Gm51617	0a_Fructose_Enhanced	12.76	4.69	5.75	14.59	18.51	27.81	31.66	18.35	29.38	25.11	46.71	51.23	39.14	5.75	18.51	39.14
Niban2	0a_Fructose_Enhanced	85.83	49.89	65.18	202.49	156.2	273.42	272.08	154.73	361.22	223.96	410.9	225.39	411.71	65.18	202.49	361.22
Gm10680	0a_Fructose_Enhanced	10.23	9.42	14.91	37.49	23.01	44.84	34.83	29.24	59.09	30.52	99.36	34.9	70.72	10.23	34.83	59.09
Wfdc2	0a_Fructose_Enhanced	103	48	42.23	134.75	179.83	191.61	223.88	218.85	282.77	237.34	245.8	240.55	404.68	48	191.61	245.8
H1f5	0a_Fructose_Enhanced	16.75	16.14	8.23	36.63	33.82	46.92	42.63	47.33	57.68	44.47	51.7	55.35	91.19	16.14	42.63	55.35
Snhg18	0a_Fructose_Enhanced	36.3	14.61	8.07	27.39	20.24	31.75	42.57	52.74	56.08	61.57	65.91	56.82	76.24	14.61	31.75	61.57
Slc1a4	0a_Fructose_Enhanced	61.14	26.28	44.37	109.85	68.11	189.08	145.16	116.72	146.94	167.57	227.17	158.12	240.18	44.37	116.72	167.57
Cdcp1	0a_Fructose_Enhanced	97.36	52.27	56.07	191.88	186.01	175.75	158.38	238.34	196.27	422	166.42	329.92	300.29	56.07	186.01	300.29
A530020G20Rik	0a_Fructose_Enhanced	9.73	14.94	10.92	24.77	47.45	18.1	41.17	33.8	42.22	75.79	25.39	47.66	75.33	10.92	33.8	47.66
Ccr2	0a_Fructose_Enhanced	32.24	31.19	30.72	115.82	36.17	148.15	77.03	77.89	124.99	99.63	140.04	107.5	194.04	31.19	77.89	124.99
Gm66571	0a_Fructose_Enhanced	10.62	12.57	23.82	59.35	43.13	20.38	41.28	45.06	33.43	108.78	45.59	74.26	77.78	12.57	43.13	74.26
Anxa2	0a_Fructose_Enhanced	344.3	182.42	203.86	461.63	509.21	1028.98	537.93	740.07	835.73	440.75	1344.07	826.2	1241.71	203.86	537.93	835.73
Stx1b	0a_Fructose_Enhanced	46.73	37.21	28.08	46.63	87.65	119.57	91.76	133.14	89.57	96.12	216.29	172.92	126.85	37.21	91.76	126.85
Apoa4	0a_Fructose_Enhanced	9196.51	10505.2	6811.37	18381.5	20268.5	28537.7	21057.7	21420.3	32035.1	22423.4	51448.9	25294.2	30409.9	9196.51	21057.7	30409.9
Dlec1	0a_Fructose_Enhanced	22.5	33.63	35.42	42.85	83.49	53.82	85.66	72.18	116.24	97.59	139.89	105.58	131.38	33.63	72.18	116.24
Mybl1	0a_Fructose_Enhanced	22.79	19.14	21.05	62.59	27.07	43.45	72.9	30.8	54.42	59.96	106.34	45.1	97.17	21.05	43.45	59.96
Tubb2a	0a_Fructose_Enhanced	666.28	385.32	506.68	704.19	640.03	1799.08	996.61	1329.94	1311.01	1408.61	3266.92	1270.15	1682.26	506.68	996.61	1408.61
Impa2	0a_Fructose_Enhanced	32.65	44.1	38.31	39.09	61.36	115.68	88.1	129.1	57.59	142	163.01	125.77	166.09	38.31	88.1	142
Scd1	0a_Fructose_Enhanced	149832	282732	203178	383405	483094	391479	351259	581189	601080	827264	735221	623121	675203	203178	391479	675203
Sytl4	0a_Fructose_Enhanced	31.13	33.24	49.71	84.88	95.71	62.2	93.96	104.15	107.94	114.95	105.04	109.26	192.89	33.24	93.96	109.26
Zfp968	0b_Fructose_Suppressed	0	0	0	0	767.25	34.83	0	431.73	298.85	0	136.61	0	204.81	0	34.83	136.61
Gm44911	0b_Fructose_Suppressed	0	0	0	145.95	54.07	181.55	109.68	63.07	91.67	51.22	44.19	48.76	45.32	0	109.68	48.76
Gm47761	0b_Fructose_Suppressed	3.4	23.25	19.44	731.77	586.58	234.83	535.3	543.54	149.39	110.13	338.85	167.65	600.79	19.44	543.54	167.65
Lcn2	0b_Fructose_Suppressed	33.36	16.07	15.72	2074.04	106.14	296.83	164.28	259.22	237.12	378.43	182.68	311.73	434.57	16.07	259.22	311.73
Gm42047	0b_Fructose_Suppressed	135.72	258.51	191.65	5244.11	4768.41	1777.41	3581.41	4142.28	1169.91	1043.19	2675.42	1406.05	4617.73	191.65	4142.28	1406.05
Anxa8	0b_Fructose_Suppressed	5.26	2.19	1.31	19.19	25.62	8.93	25.95	8.98	17.14	8.32	13.78	5.23	10.45	2.19	19.19	10.45
Gm28661	1_Strict_Shared_Up	0	0	0	2751.62	540.62	765.41	123.49	3892.3	396.46	573.42	2109.25	5449.17	327.88	0	765.41	573.42
Gm63949	1_Strict_Shared_Up	0	0	0	0	101.53	87.06	0	108.97	98.07	48.62	38.21	0	81.26	0	87.06	48.62
Cyp2b13	1_Strict_Shared_Up	0	0	3.44	277.03	150.96	13.32	172	306.02	225.06	267.82	64.17	301.3	363.36	0	172	267.82
Gm2007	1_Strict_Shared_Up	0	0	0	12.16	0	85.38	0	23.67	55.6	23.61	16.02	26.68	36.44	0	12.16	26.68
Sptlc3	1_Strict_Shared_Up	0	0.78	0	9.44	29.73	10.34	5.37	66.92	8.46	19.18	2.33	83.48	31.29	0	10.34	19.18
B430212C06Rik	1_Strict_Shared_Up	5.91	1.85	1.66	28.47	36.92	230.79	105.17	94.61	165.83	96	80.39	105.97	122.43	1.85	94.61	105.97
Mas1	1_Strict_Shared_Up	0	0	0	1.78	20.47	5.56	15.28	19.96	9.7	5.48	6.02	9.35	18.78	0	15.28	9.35
Cidea	1_Strict_Shared_Up	97.44	3.07	2.75	504.82	322.31	2941.86	878.41	1034.12	1262.53	1020.27	1929.06	1358.28	1523.52	3.07	878.41	1358.28
Cfd	1_Strict_Shared_Up	68.98	9.74	32.8	807.39	426.23	1461.83	1268.16	2984.14	964.07	2055.26	1503.22	852.46	1159.13	32.8	1268.16	1159.13
Ucp3	1_Strict_Shared_Up	0	0	0.65	7.57	10.6	25.51	20.12	11.13	17.65	7.74	8.91	20.46	20.24	0	11.13	17.65
Gm37844	1_Strict_Shared_Up	0	0	0.69	4.04	6.76	19.6	15.85	11.83	19.45	3.37	13.77	13.76	13.09	0	11.83	13.76
Gm37795	1_Strict_Shared_Up	0	2.3	2.06	58.59	36.05	54.87	54.64	31.55	62.51	44.53	62.68	35.81	43.38	2.06	54.64	44.53
Gm19744	1_Strict_Shared_Up	0	0	0.83	12.28	5.47	18.46	20.11	3.11	26.12	3.04	2.53	4.23	14.23	0	12.28	4.23
Gm36161	1_Strict_Shared_Up	2.62	0.6	0.45	24.16	4.47	21.41	21.66	12.59	15.82	6.26	11.61	2.69	34.24	0.6	21.41	11.61
Chi3l1	1_Strict_Shared_Up	3.14	0	0.66	13.59	6.49	9.5	6.77	10.63	12.31	8.77	9.97	12.42	14.68	0.66	9.5	12.31
Gm13067	1_Strict_Shared_Up	0	1.12	1.5	16.82	8.66	22.88	30.11	13.73	16.57	13.82	30.6	18.49	12.02	1.12	16.82	16.57
Sdcbp2	1_Strict_Shared_Up	3.36	0	4.81	14.17	4.51	57.98	28.27	32.34	43.78	21.59	42.75	21.15	60.53	3.36	28.27	42.75
Gm45941	1_Strict_Shared_Up	11.54	3.65	3.15	137.18	26.73	156.75	134.42	38.64	105.99	76.8	86.09	22.54	64.05	3.65	134.42	76.8
Atp8b5	1_Strict_Shared_Up	12.26	8.08	9.43	177.64	67.62	171.87	176.74	118.36	138.82	139.95	160.73	109.94	141.48	9.43	171.87	139.95
Orm3	1_Strict_Shared_Up	20.11	22.29	37.06	496.27	96.94	210.4	225.48	273.71	357.89	440.7	226.65	329.22	460.18	22.29	225.48	357.89
Eda2r	1_Strict_Shared_Up	31.05	21.49	24.98	406.45	308.82	291.51	319.13	279.06	300.48	349.37	399.86	243.59	248.66	24.98	308.82	300.48
Gm53846	1_Strict_Shared_Up	0	1.15	1.03	7.65	5.88	27.69	10.92	7.35	12.89	2.75	27.61	10.52	8.46	1.03	7.65	10.52
Ccr1	1_Strict_Shared_Up	0	0.77	1.38	38.38	4.51	12.54	6.17	5.52	11.81	14.85	13.76	9.18	10.33	0.77	6.17	11.81
Mmp12	1_Strict_Shared_Up	27.2	13.46	11.62	176.68	50.99	443.44	100.49	124.48	287.19	98.26	104.37	161.27	316.95	13.46	124.48	161.27
Adam11	1_Strict_Shared_Up	12.11	69.9	43.14	606.93	551.31	305.91	503.41	520.72	510.14	584.64	338.71	394.66	581.7	43.14	520.72	510.14
Phlda3	1_Strict_Shared_Up	13.23	14.34	16.22	203.02	99.71	172.53	206.45	113.23	173.06	139.33	174.56	107.08	150.12	14.34	172.53	150.12
Ccl2	1_Strict_Shared_Up	6.97	2.39	2.47	27.45	9.37	39.42	15.67	24.23	26.36	18.2	27.68	27.8	43.51	2.47	24.23	27.68
Ankrd40cl	1_Strict_Shared_Up	12.84	2.94	6.28	47.52	47.5	43.77	49.92	61.25	48.1	52.92	43.71	66.77	54.52	6.28	47.52	52.92
Cidec	1_Strict_Shared_Up	368.93	129.74	92.42	1063.18	834.18	1635.88	1292.5	2172.92	1634.93	1729.73	1890.06	1711.82	1936.58	129.74	1292.5	1729.73
Gm19619	1_Strict_Shared_Up	96.22	41.05	30.9	365.91	370.34	613.28	592.88	432.81	613.27	385.67	384.69	417.53	524.84	41.05	432.81	417.53
Gm10851	1_Strict_Shared_Up	0	1.53	2.06	10.11	11.27	25.07	3.53	18.93	20.14	8.09	8.4	22.05	12.38	1.53	11.27	12.38
Gm34333	1_Strict_Shared_Up	7.9	0.91	0.75	12	11.12	31.77	19.72	5.18	15.59	3.79	33.12	8.24	14.3	0.91	12	14.3
Hao2	1_Strict_Shared_Up	6.73	1.53	3.44	30.33	63.1	3.92	18.52	40.23	18.76	29.69	12.99	27.56	53.7	3.44	30.33	27.56
Ephb2	1_Strict_Shared_Up	29.39	2.14	4.52	13.06	19.07	63.53	17.18	19.02	53.94	8.07	50.2	29.5	45.26	4.52	19.02	45.26
Ddias	1_Strict_Shared_Up	21.6	8.61	23.74	167.75	108.39	102.41	129.82	92.15	158.99	131.76	171.25	91.48	136.51	21.6	108.39	136.51
Themis	1_Strict_Shared_Up	323.66	9.8	24.78	504.53	517.2	1077.22	1128.02	679.08	1120.38	520.54	782.04	1142.5	1230.82	24.78	679.08	1120.38
Cxcl2	1_Strict_Shared_Up	0	0.94	2.55	6.94	12.58	8.29	10.08	12.08	10.84	5.58	9.7	13.35	18.68	0.94	10.08	10.84
Slfn1	1_Strict_Shared_Up	0	3.07	0	30.33	2.25	14.89	11.47	7.89	17.36	4.05	11.46	5.51	14.45	0	11.47	11.46
Mmp13	1_Strict_Shared_Up	3.37	0.77	2.06	8.08	2.25	25.09	6.17	8.68	15.98	3.37	14.53	13.77	22.04	2.06	8.08	14.53
Gm33447	1_Strict_Shared_Up	6.67	1.53	3.41	8.06	13.43	20.99	20.21	17.58	33.92	10.79	21.46	20.08	31.49	3.41	17.58	21.46
Gm36615	1_Strict_Shared_Up	63.93	19.06	13.59	311.75	113.44	295.55	193.82	230.57	197.31	178.07	206.24	177.99	161.98	19.06	230.57	178.07
Fam83f	1_Strict_Shared_Up	30.33	12.28	17.2	84.84	54.08	172.5	129.51	64.68	128.52	151.18	68.06	107.4	136.39	17.2	84.84	128.52
Fndc10	1_Strict_Shared_Up	6.74	3.84	4.81	12.13	18.03	38.41	22.93	20.51	29.87	14.84	27.51	35.82	46.13	4.81	20.51	29.87
Smpd3	1_Strict_Shared_Up	20.32	51.2	46.02	205.07	107.33	387.45	229.63	112.5	384.15	110.91	240.82	261.22	287.87	46.02	205.07	261.22
Grip1	1_Strict_Shared_Up	7.73	0	3.79	8.76	9.78	38.13	15.51	9.55	21.61	8.98	20.82	16.63	20.36	3.79	9.78	20.36
Fgf9	1_Strict_Shared_Up	3.91	4.1	2.32	4.68	9.16	14.86	29.02	16.6	20.26	26.89	30.27	19.5	10.16	3.91	14.86	20.26
Orm2	1_Strict_Shared_Up	113.97	57.64	73.43	740.31	169.08	365.27	276.95	334.44	479.51	406.34	386.37	530.25	668.68	73.43	334.44	479.51
Gm52350	1_Strict_Shared_Up	11.22	4.76	3.34	7.2	29.45	24.05	25.67	24.15	26.23	39.9	16.93	31.25	42.63	4.76	24.15	31.25
Slc13a4	1_Strict_Shared_Up	17.18	1.3	1.97	17.16	5.74	59.04	23.73	14.07	46.92	19.03	28.6	23.29	37.37	1.97	17.16	28.6
Gm4735	1_Strict_Shared_Up	0	9.21	0	0	51.83	24.28	39.76	17.35	25.71	25.63	16.79	24.83	17.88	0	24.28	24.83
Psd4	1_Strict_Shared_Up	44.48	28.17	26.1	80.12	159.9	235.68	218.36	197.81	228.47	152	130.17	208.3	222.84	28.17	197.81	208.3
Gm38956	1_Strict_Shared_Up	16.67	5.63	6.49	35.46	38.23	58.83	64.79	42.02	63.87	32.02	43.03	32.83	52.92	6.49	42.02	43.03
Gm45425	1_Strict_Shared_Up	32.78	35.14	29.1	209.33	146.95	168.8	186.46	176.85	212.81	194.12	209.11	185.1	159.18	32.78	176.85	194.12
Gm50314	1_Strict_Shared_Up	3.36	1.54	1.37	8.1	13.52	5.48	14.13	16.57	7.64	6.75	11.45	11.95	12.38	1.54	13.52	11.45
Gm70521	1_Strict_Shared_Up	10.75	3.31	4.34	28.37	30.59	42.93	42.42	15.77	33.16	19.25	32.47	24.16	31.35	4.34	30.59	31.35
Ddit4l	1_Strict_Shared_Up	9.48	8.64	7.74	64.25	15.85	23.72	50.99	64.69	42.01	50.53	50.96	21.32	85.16	8.64	50.99	50.53
Gm16006	1_Strict_Shared_Up	0	2.31	2.06	10.18	13.52	8.59	14.22	4.73	15.28	6.06	12.9	7.38	14.37	2.06	10.18	12.9
Gm56957	1_Strict_Shared_Up	2.93	0	6.38	24.79	9.82	20.2	21.53	9.18	16.56	12.93	21.03	12.01	29.11	2.93	20.2	16.56
Grin3b	1_Strict_Shared_Up	0	1.12	3.2	22.22	20.02	17	8.36	7.49	9.64	6.32	6.7	12.88	13.59	1.12	17	9.64
Gm44507	1_Strict_Shared_Up	19.07	28.35	36.93	155.44	154.05	268.54	95.33	161.95	218.57	249.3	99.13	148.29	134.14	28.35	155.44	148.29
Gm60916	1_Strict_Shared_Up	8.97	3.19	8.37	10.96	54.87	19.97	57.64	18.88	45.8	36.86	12.76	43.09	37.68	8.37	19.97	37.68
Gm45187	1_Strict_Shared_Up	6.8	5.42	6.04	43.84	25.02	33.08	18.68	24.49	23.7	22.35	29.92	51.36	34.62	6.04	25.02	29.92
Gm70669	1_Strict_Shared_Up	3.35	0	3.43	10.19	6.77	10.16	6.23	13.41	10.43	8.09	10.64	10.16	14.39	3.35	10.16	10.43
ENSMUSG00000128948	1_Strict_Shared_Up	16.1	1.55	2.84	14.16	20.22	22.06	18.15	11.87	19.4	23.32	20.35	22.91	25.5	2.84	18.15	22.91
Gria3	1_Strict_Shared_Up	10.99	18.8	23.7	95.82	30.28	168.12	123.38	93.3	155.78	72.67	104.6	83.96	113.4	18.8	95.82	104.6
Gm47790	1_Strict_Shared_Up	23.05	8.27	3	30.95	39.08	56.16	70.49	42.13	47.75	24.96	61.77	36.97	52.78	8.27	42.13	47.75
Sema5b	1_Strict_Shared_Up	101.46	61.74	50.91	192.74	415.09	215.59	307.49	382.24	269.47	362	326.03	413.76	451.16	61.74	307.49	362
Gm65993	1_Strict_Shared_Up	6.68	6.08	4.54	25.7	58.86	19.19	9.3	18.44	45.33	25.86	29.12	24.21	24.23	6.08	19.19	25.86
Slc22a29	1_Strict_Shared_Up	27.12	6.79	16.14	88.59	65.48	28.43	71.4	47.52	52.02	89.77	78.76	76.62	76.11	16.14	65.48	76.62
Ctse	1_Strict_Shared_Up	16.84	3.07	6.88	30.32	20.28	22.73	29.1	33.13	27.09	37.79	34.39	31.23	43.37	6.88	29.1	34.39
Acot11	1_Strict_Shared_Up	159.14	76.35	77.79	457.34	357.01	612.47	474.82	481.6	668.63	584.67	356.62	443.38	532.15	77.79	474.82	532.15
Gm50598	1_Strict_Shared_Up	0	0	4.52	21.71	7.43	15.05	14.11	8.45	9.43	14.06	9.13	6.26	17.9	0	14.11	9.43
Gm35353	1_Strict_Shared_Up	6.01	4.39	3.49	20.73	11.25	12.61	23.87	21.02	24.54	14.93	18.07	28.5	22.55	4.39	20.73	22.55
Mansc4	1_Strict_Shared_Up	3.19	5.95	1.31	11.55	21.41	11.16	15.12	13.49	13.86	16.45	18.83	17.6	14.36	3.19	13.49	16.45
Adgrv1	1_Strict_Shared_Up	299.78	127.87	108.91	557.15	623	2822.23	875.67	569.19	1526.77	566.45	958.89	759.14	742.42	127.87	623	759.14
Cfap20dc	1_Strict_Shared_Up	6.72	3.06	6.18	18.14	24.73	33.31	14.95	15.74	32.76	22.89	29.75	16.49	24.32	6.18	18.14	24.32
Gm45424	1_Strict_Shared_Up	10.11	18.41	2.06	58.57	42.81	59.59	60.78	48.91	61.83	50.62	57.37	37.63	48.22	10.11	58.57	50.62
Gm34921	1_Strict_Shared_Up	6.73	4.6	2.75	12.13	18.03	44.67	41.46	6.31	40.99	5.4	21.39	10.11	29.6	4.6	18.03	21.39
Gm71933	1_Strict_Shared_Up	22.05	8.98	22.67	43.42	63.16	50.41	77.01	57.97	82.37	86.52	40.69	88.41	101.39	22.05	57.97	86.52
Acod1	1_Strict_Shared_Up	6.74	1.53	2.06	16.16	2.25	17.25	9.69	8.68	11.12	8.1	19.11	6.43	13.77	2.06	9.69	11.12
Gpc1	1_Strict_Shared_Up	333.24	183.74	262.83	727.06	877.59	1225.45	1225.84	1098.95	1411.1	870.11	1199.67	1251.16	1267.11	262.83	1098.95	1251.16
Gm69837	1_Strict_Shared_Up	16.79	6.91	5.49	18.27	22.54	46.96	30.11	21.3	41.69	27.64	33.52	38.68	36.39	6.91	22.54	36.39
Ripply1	1_Strict_Shared_Up	3.35	1.54	2.75	10.16	11.27	6.26	15.97	9.47	7.64	6.07	9.89	13.83	15.78	2.75	10.16	9.89
Slc35f2	1_Strict_Shared_Up	36.95	6.68	16.63	50.81	47.95	81.89	66.49	65.61	71.6	42.42	85.04	65.05	84.53	16.63	65.61	71.6
S100a6	1_Strict_Shared_Up	6.21	13.54	5.72	49.05	29.26	35.52	29.64	25.88	33.5	26.16	76.6	30.45	35.58	6.21	29.64	33.5
Ube2c	1_Strict_Shared_Up	3.38	4.9	5.54	26.59	9.09	10.25	12.49	21.46	16.11	19.02	13.82	25.06	34.6	4.9	12.49	19.02
Gm49708	1_Strict_Shared_Up	1.43	8.66	6.3	12.6	45.05	29.59	13.5	20.98	23.06	25.57	26.93	39.89	14.63	6.3	20.98	25.57
Zfp979	1_Strict_Shared_Up	65.22	19.27	53.05	103.25	129.55	217.67	141.86	131.77	206.11	164.25	113.43	262.62	193.72	53.05	131.77	193.72
Fam241b	1_Strict_Shared_Up	30.93	11	16.64	28.35	66.12	63.99	75.04	49.98	61.01	52.77	71.79	57.11	116.76	16.64	63.99	61.01
ENSMUSG00000143548	1_Strict_Shared_Up	3.31	1.51	3.38	6.64	11.1	14.84	9.58	6.46	10.82	9.96	14.46	12.19	7.89	3.31	9.58	10.82
Gm31522	1_Strict_Shared_Up	93.94	82.24	63.4	179.37	217.78	216.59	264.77	271.01	274.09	229.35	457.48	315.78	318.18	82.24	217.78	315.78
Traf1	1_Strict_Shared_Up	2.16	2.36	7.35	15.39	7.59	21.51	11.77	14.12	22.82	9.01	20.62	16.48	23.17	2.36	14.12	20.62
Tnfrsf10b	1_Strict_Shared_Up	12.91	7.67	6.85	29.01	19.86	32.43	37.97	31.45	34.65	41.54	27.1	26.05	34.37	7.67	31.45	34.37
Zfp993	1_Strict_Shared_Up	0	7.34	11.35	44.04	31.36	17.03	23.83	70.47	48.14	39.88	17.25	14.4	39.46	7.34	31.36	39.46
Siglech	1_Strict_Shared_Up	11.02	2.88	2.55	21.9	4.43	22.23	11.14	22.28	27.42	14.11	9.09	6.43	17.98	2.88	21.9	14.11
Cd36	1_Strict_Shared_Up	3443.46	1318.39	1671.18	5747.13	5960.09	5431.44	6976.48	8321.42	7294.86	8577.63	8631.65	8480.35	10953.8	1671.18	5960.09	8577.63
Lgals1	1_Strict_Shared_Up	537.28	170.56	313.69	708.09	902	958.55	1163.4	1324.78	1225.92	1231.3	1239.85	1373.9	1789.25	313.69	958.55	1239.85
ENSMUSG00000135515	1_Strict_Shared_Up	43.74	21.44	10.92	39.36	74.2	61.88	65.25	100.94	52.43	68.14	139.97	101.58	89.73	21.44	65.25	89.73
Saa3	1_Strict_Shared_Up	50.99	33.02	55.92	341.47	100.99	313.71	100.67	142.87	173.76	282.98	111.59	163.24	203.58	50.99	142.87	173.76
S100a11	1_Strict_Shared_Up	13.34	16.92	6.85	38.88	6.77	85.07	37.54	34.71	72.95	35.66	39.39	37.96	54.64	13.34	37.54	39.39
Cstpp1	1_Strict_Shared_Up	18.5	5.45	9.53	33.81	37.03	24.48	30.89	38.48	32.27	28.78	22.82	51.32	36.65	9.53	33.81	32.27
Stap1	1_Strict_Shared_Up	137.86	22.2	15.68	143.66	191.29	170.27	245.36	133.62	272.1	140.03	201.59	180.52	193.92	22.2	170.27	193.92
Rgma	1_Strict_Shared_Up	8.93	3.92	4.46	26.37	9.51	7.37	13.67	22.38	24.01	18.75	12.86	15.41	25.45	4.46	13.67	18.75
Pnldc1	1_Strict_Shared_Up	111.4	23.7	37.47	125.72	255.59	278.33	308.01	194.21	234.47	119.7	255.63	223.58	206.67	37.47	255.59	223.58
Tceal8	1_Strict_Shared_Up	305.56	125.42	180.53	461.93	487.83	682.75	693.49	703.5	689.66	583.21	777.28	761.1	974.43	180.53	682.75	761.1
Nalf2	1_Strict_Shared_Up	37.08	40.66	28.9	107.01	123.93	135.67	118.88	130.95	143.79	113.39	137.71	142.24	131.6	37.08	123.93	137.71
Sulf2	1_Strict_Shared_Up	249.11	261.89	261.04	783.01	862.26	815.4	1029.6	1085.8	1059.8	1103.22	829.55	1000.7	938.97	261.04	862.26	1000.7
Crybg2	1_Strict_Shared_Up	15.53	25.92	31.46	61.5	138.59	86.68	90.25	123.34	111.5	55.44	168.85	79.61	82.89	25.92	90.25	82.89
Limk1	1_Strict_Shared_Up	30.54	37.11	42.35	85.07	52.96	215.88	165.63	135.92	157.94	104.22	162.71	105.96	172.5	37.11	135.92	157.94
S100a4	1_Strict_Shared_Up	0	6.15	2.74	12.27	9.01	20.27	15.19	13.4	15.96	10.75	18.16	8.33	17.73	2.74	13.4	15.96
Gm15411	1_Strict_Shared_Up	27.7	11.6	26.86	51.31	55.42	74.52	80.6	70.01	94.39	72.72	56.8	90.41	77.68	26.86	70.01	77.68
Gm41750	1_Strict_Shared_Up	0	4.48	4.79	12.72	16.97	14.34	15.17	15.51	18.85	17.22	9.94	12.4	15.7	4.48	15.17	15.7
Gm51874	1_Strict_Shared_Up	0	2.3	4.81	10.1	22.53	11.76	14.98	4.73	13.2	8.1	9.94	11.02	14.46	2.3	11.76	11.02
Gm73977	1_Strict_Shared_Up	13.14	8.47	4.38	14.89	37.85	25.92	29.85	19.29	44.34	13.63	34.27	17.8	26.37	8.47	25.92	26.37
Gm71860	1_Strict_Shared_Up	2.6	2.38	3.82	4.72	3.5	12.58	18.96	12.64	9.18	12.8	10.94	10	11.35	2.6	12.58	10.94
Cx3cr1	1_Strict_Shared_Up	13.48	8.44	8.94	30.29	18.03	31.37	22.9	22.88	32.65	20.25	50.49	32.12	34.45	8.94	22.9	32.65
Gm59620	1_Strict_Shared_Up	30.31	11.5	14.44	40.59	42.78	26.63	42.49	66.2	56.26	55.95	49.57	57.09	64.53	14.44	42.49	56.26
Cxcl10	1_Strict_Shared_Up	13.44	18.99	25.46	47.8	29.3	72.5	97.31	40.12	62.37	44.46	97.11	77.78	83.73	18.99	47.8	77.78
Gdf15	1_Strict_Shared_Up	66.74	130.51	55.83	412.66	192.71	279.11	397.6	349.62	293.07	431.8	314.67	189.71	286.54	66.74	349.62	293.07
Gm74457	1_Strict_Shared_Up	10.09	6.91	1.37	14.18	13.52	43.08	29.17	9.47	29.18	10.12	16.02	17.48	17.87	6.91	14.18	17.48
4933405D12Rik	1_Strict_Shared_Up	32.32	9.53	13.31	25.61	68.29	160.94	76.02	67.2	107.52	32.66	47.48	61.62	45.49	13.31	68.29	47.48
Gm72636	1_Strict_Shared_Up	6.61	1.63	5.1	15.92	13.29	16.17	13.02	10.85	21.85	11.27	10.51	8.13	15.54	5.1	13.29	11.27
Lrrc39	1_Strict_Shared_Up	37.27	12.46	7.51	17.86	41.19	49.3	43.53	36.77	57.43	39.61	61.92	52.69	49.94	12.46	41.19	52.69
Sult2a7	1_Strict_Shared_Up	43.66	20.02	27.5	200.58	58.05	84.64	158.25	60.85	86.33	105.32	97.96	99.44	103.08	27.5	84.64	99.44
A930001C03Rik	1_Strict_Shared_Up	39.97	28.25	26.04	76.42	64.33	94	93.3	80.25	99.53	89	140.15	88.76	88.67	28.25	80.25	89
Ly6c2	1_Strict_Shared_Up	6.92	2.46	4.25	25.15	9.3	12.22	9.34	13.01	18.92	11.22	13.34	5.79	17.8	4.25	12.22	13.34
Gbp10	1_Strict_Shared_Up	116.07	63.84	131.36	235.65	224.16	303.03	350.46	233.91	284.06	220.8	511.13	251.96	503.03	116.07	235.65	284.06
Zbtb47	1_Strict_Shared_Up	10.92	11.28	19.55	32.08	36.49	54.64	41.83	50.63	65.44	52.6	42.63	31.76	49.66	11.28	41.83	49.66
H4c12	1_Strict_Shared_Up	13.27	10.74	11.68	39.22	40.69	26.43	38.73	40.92	45.09	29.49	34.93	32.55	54.22	11.68	39.22	34.93
Apobr	1_Strict_Shared_Up	8.6	7.83	13.45	22.32	13.41	30	48.23	30.69	24.22	36.36	38.15	25.75	53.61	8.6	30	36.36
Nim1k	1_Strict_Shared_Up	34.51	21.54	23.29	59.04	90.68	61.9	81.85	80.7	75.92	78.12	80.56	97.07	79.09	23.29	80.7	79.09
Lpar1	1_Strict_Shared_Up	12.29	16.73	19.61	25.78	49.43	63	32.71	43.15	87.74	24.34	58.37	55.95	64.53	16.73	43.15	58.37
Tpm2	1_Strict_Shared_Up	195.29	93.36	146.12	391.61	444.98	379.89	467.61	704.4	370.99	500.83	440.47	520.95	550.54	146.12	444.98	500.83
Clec7a	1_Strict_Shared_Up	103.86	99.49	112.17	168.66	190.38	467.74	278.7	265.16	382.03	290.93	304.74	274.77	525.17	103.86	265.16	304.74
Dyrk3	1_Strict_Shared_Up	21.31	12.47	14.91	109.83	30.53	48.16	50.92	46.31	40.78	63.62	88.15	37.31	29.24	14.91	48.16	40.78
H3c11	1_Strict_Shared_Up	26.59	9.23	10.97	51.38	22.56	32.73	61.03	60.73	33.33	42.99	16.66	38.98	99.41	10.97	51.38	38.98
Gm12250	1_Strict_Shared_Up	23.12	15.81	24.28	97.18	46.42	53.05	49.31	38.69	68.83	52.29	81.88	42.35	101.12	23.12	49.31	68.83
Acot6	1_Strict_Shared_Up	10.15	20.74	17.83	48.49	54.13	61.22	62.58	48.98	54.79	58.64	57.36	52.3	72.85	17.83	54.13	57.36
Slamf7	1_Strict_Shared_Up	7.43	8.07	7.03	31.49	14.29	22.72	14.25	24.45	24.24	17.59	31.11	21.41	29.87	7.43	22.72	24.24
Dync2li1	1_Strict_Shared_Up	3.32	5.31	7.47	20	17.81	18.57	17.9	14.02	24.02	14.66	18.84	16.8	23.77	5.31	17.9	18.84
Treh	1_Strict_Shared_Up	89.58	31	38.23	125.5	83.35	199.8	141.77	132.93	154.36	130.12	218.26	125.16	144.14	38.23	132.93	144.14
Gm13657	1_Strict_Shared_Up	49.57	14.59	10.75	79.48	54.52	71.4	76.02	55.79	92.9	52.32	56.9	54.35	56.25	14.59	71.4	56.25
Gm50340	1_Strict_Shared_Up	15.25	8.27	3.94	23.69	28.16	19.44	17.4	29.55	18.7	17.02	22.78	32.61	22.39	8.27	23.69	22.39
Zfp786	1_Strict_Shared_Up	5.75	2.88	6.1	16.88	11.54	7.22	40.58	12.24	14.83	10.82	14.22	19.57	16.34	5.75	12.24	14.83
Mtnr1a	1_Strict_Shared_Up	39.81	35.57	21.01	39.9	55.55	83.33	67.79	92.77	67.13	68.43	153.23	110.19	89.54	35.57	67.79	89.54
Plin4	1_Strict_Shared_Up	735.8	1151.15	1362.52	3032.72	3028.88	2055.43	2816.08	4340.83	2024.22	4366.2	3304.18	3726.47	3760.22	1151.15	3028.88	3726.47
Gm34802	1_Strict_Shared_Up	7.08	5.39	4.06	16.52	17.19	19.26	12.73	9.14	10.71	9.74	20.05	24.91	14.76	5.39	16.52	14.76
Osbpl3	1_Strict_Shared_Up	390.72	65.41	197.33	405.59	288.8	948.08	910.59	493.18	1004.1	622.58	524.17	536.09	707.51	197.33	493.18	622.58
Gm11752	1_Strict_Shared_Up	50.33	14.6	16.48	44.68	63.12	75.91	103.7	60.74	119.53	52.58	52.54	58.04	83.74	16.48	63.12	58.04
Gbp6	1_Strict_Shared_Up	133.15	96.35	128.37	282.58	207.08	355.16	282.18	313.38	283.78	230.66	479.72	336.73	521	128.37	282.58	336.73
Sema4d	1_Strict_Shared_Up	10.58	7.11	9.59	36.65	7.07	86.12	28.88	31.94	21.8	33.15	27.04	20.85	35.6	9.59	31.94	27.04
Ccng1	1_Strict_Shared_Up	1078.55	828.53	855.17	3321.82	2379.49	2714.75	3172.35	2977.03	2761.3	2983.87	2991.68	2558.8	2868.8	855.17	2977.03	2868.8
Gm16278	1_Strict_Shared_Up	3.37	4.6	2.06	16.17	11.27	10.19	16.76	9.47	15.28	11.47	6.88	8.27	8.95	3.37	11.27	8.95
Vnn1	1_Strict_Shared_Up	1251.07	816.64	906.67	2860.93	1999.39	2350.8	3323.94	2937.02	2148.38	2786.68	3410.35	3542.48	3297.19	906.67	2860.93	3297.19
Gm13236	1_Strict_Shared_Up	132.77	146.16	134.82	296.76	310.11	409.48	293.75	339.78	375.2	425.84	389.78	522.77	417.51	134.82	310.11	417.51
Dglucy	1_Strict_Shared_Up	449.48	317.06	425.73	1015.08	931.61	1246.08	1386.42	1166.69	1149.96	1321.12	1216.45	1129.62	1220.72	425.73	1166.69	1216.45
Cyp46a1	1_Strict_Shared_Up	22.7	12.77	23.99	31.16	45.84	38.35	111.04	48.65	85.01	67.3	45.06	41.65	52.14	22.7	45.84	52.14
Gm31600	1_Strict_Shared_Up	76.07	43.11	78.39	82.55	234.45	213.83	240.5	186.5	262.56	214.78	128.28	213.08	168.45	76.07	213.83	213.08
Zbp1	1_Strict_Shared_Up	9.35	28.86	26.68	104.29	19.32	63.11	65.2	53.56	54.56	82.72	53.9	55.43	89.11	26.68	63.11	55.43
ENSMUSG00000143506	1_Strict_Shared_Up	47.31	50.02	36.49	85.11	109.84	116.83	112.31	75.85	128.98	116.28	115.33	140.13	143.35	47.31	109.84	128.98
Zfp992	1_Strict_Shared_Up	171.94	124.27	91.51	288.66	295.17	467.42	216.57	326.57	336.91	336.14	263.98	513.83	390.04	124.27	295.17	336.91
Gm30446	1_Strict_Shared_Up	38.62	25.84	18.4	41.27	33.34	111.48	76.28	59.17	126.35	60.57	77.64	42.6	77.94	25.84	59.17	77.64
Padi2	1_Strict_Shared_Up	3.37	3.84	4.13	18.17	15.77	19.61	9.68	11.04	6.95	16.2	9.18	15.6	9.65	3.84	15.77	9.65
Spink5	1_Strict_Shared_Up	20.23	19.18	11.01	64.59	63.09	50.19	60.74	61.53	60.43	40.5	55.09	35.78	37.21	19.18	61.53	40.5
Bmyc	1_Strict_Shared_Up	26.86	32.26	32.28	85.23	69.88	76.71	54.9	105.7	79.22	97.09	67.81	124.31	88.6	32.26	76.71	88.6
Trim13	1_Strict_Shared_Up	23.55	12.28	21.31	50.6	40.57	45.44	39.73	33.13	55.58	41.15	44.29	60.66	59.17	21.31	40.57	55.58
Dcaf4	1_Strict_Shared_Up	18.78	19.94	24.89	45.11	73.21	64.14	67.89	86.48	70.27	62.17	42.93	70.76	68.35	19.94	67.89	68.35
Eda	1_Strict_Shared_Up	26.43	19.69	41.79	38.68	72.62	60.38	75.13	73.01	79.24	81.09	54.63	84.49	134.67	26.43	72.62	81.09
Mx1	1_Strict_Shared_Up	7.34	17.18	10.78	81.65	24.96	56.16	55.29	22.07	37.86	25.02	37.99	36.76	40.51	10.78	55.29	37.86
A630031M04Rik	1_Strict_Shared_Up	211.41	126.99	93.76	259.23	421.13	436.46	495.55	319.88	443.47	309.35	359.51	391.42	429.93	126.99	421.13	391.42
Mirt2	1_Strict_Shared_Up	15.48	9.23	6.72	26.98	39.79	31.23	28.02	13.58	40.92	15.52	23.55	27.37	20.14	9.23	28.02	23.55
C730002L08Rik	1_Strict_Shared_Up	95.36	111.23	105.53	184.45	325.59	197.83	185.72	267.71	230.33	334.43	285.58	335.18	279.84	105.53	197.83	285.58
Gpat3	1_Strict_Shared_Up	218.4	171.92	180.54	460.72	450.62	281.06	413.15	530.5	341.91	787.87	393.36	550.49	544.8	180.54	450.62	544.8
2010003K11Rik	1_Strict_Shared_Up	235.25	447.68	241.86	948.55	703.21	494.15	582.77	862.95	696.91	682.47	1146.27	776.54	992.5	241.86	703.21	776.54
Gm31121	1_Strict_Shared_Up	84.89	55.57	44.06	133.78	139.41	174.6	64.57	141.64	160.07	157.67	269.19	172.1	63.57	55.57	139.41	160.07
Ripor2	1_Strict_Shared_Up	71.22	26.5	30.77	100.76	72.4	204.02	205.73	39.21	177.65	81.4	77.13	112.29	119.12	30.77	100.76	112.29
Oasl2	1_Strict_Shared_Up	28.87	48.91	43.84	131.58	70.73	111.84	93.94	82.47	139.77	81.9	116.84	99.06	143.15	43.84	93.94	116.84
Ace	1_Strict_Shared_Up	12.63	9.34	14.29	51.21	10.55	32.08	28.82	34.46	31.26	40.5	23.97	28.36	36.79	12.63	32.08	31.26
Clstn3	1_Strict_Shared_Up	1012.2	313.64	328.21	961.05	1450.96	1619.67	1376.49	1434.61	1320.91	1439	1463.85	1496.53	1648.32	328.21	1434.61	1463.85
Gm19840	1_Strict_Shared_Up	6.71	6.15	8.24	20.31	31.56	16.43	16.84	14.99	18.07	14.83	22.08	21.19	21.28	6.71	16.84	21.19
Gm50240	1_Strict_Shared_Up	42.31	19.27	17.91	37.81	48.46	73.97	51.17	49.61	67.48	55.85	53.57	68.31	49.91	19.27	49.61	55.85
Oas3	1_Strict_Shared_Up	19.52	23.68	17.42	62.32	26.09	51.46	62.86	35.01	71.91	47.55	42.82	39.84	68.29	19.52	51.46	47.55
Tafa5	1_Strict_Shared_Up	43.8	16.88	32.33	52.53	72.11	52.53	78.43	99.39	76.42	65.46	45.87	95.49	99.86	32.33	72.11	76.42
Samd9l	1_Strict_Shared_Up	407.95	317.01	324.18	769.41	683.13	840.71	1149.86	532.85	1141.23	696.78	805.92	805.89	1178.66	324.18	769.41	805.92
Extl1	1_Strict_Shared_Up	118.45	89.37	106.29	211.1	388.41	305.28	297.49	262.58	289.2	222.18	221.42	333.72	302.28	106.29	297.49	289.2
A730036I17Rik	1_Strict_Shared_Up	13.16	20.11	8.33	44.64	31.69	65.51	45.92	36.4	72.74	22.79	34.59	31.13	26.74	13.16	44.64	31.13
Pparg	1_Strict_Shared_Up	376.26	92.89	157.54	347.49	452.94	742.32	770.57	424.4	610.42	395.97	423.4	595.15	638.26	157.54	452.94	595.15
Ggct	1_Strict_Shared_Up	40.57	78.57	64.07	150.22	143.56	109.6	115.74	165.87	159.68	174.91	152.62	154.99	195.56	64.07	143.56	159.68
Tlr12	1_Strict_Shared_Up	193.18	153.17	179.04	283.45	331.83	543.25	458.82	253.38	418.81	301.31	650.84	389.19	522.21	179.04	331.83	418.81
Inhbe	1_Strict_Shared_Up	1102.61	1225.74	498.2	2090.89	2070.71	3723.91	2605.35	1864	2210.35	1369.6	2882.81	2846.85	3011.09	1102.61	2090.89	2846.85
Bhlhb9	1_Strict_Shared_Up	57.24	25.61	52.57	78.72	101.16	95.45	138.55	103.12	115.5	118.55	70.21	128.17	126.86	52.57	101.16	118.55
Gas7	1_Strict_Shared_Up	84.15	59.61	49.84	139.3	129.76	134.61	192.12	199.16	163.04	100.16	196.01	167.28	177.67	59.61	139.3	167.28
Arsg	1_Strict_Shared_Up	309.97	244.01	172.51	411.74	482.9	685.22	532.46	421.82	532.9	421.87	1133.33	470.31	517.82	244.01	482.9	517.82
Flrt2	1_Strict_Shared_Up	17	7.73	14.29	29.36	31.86	26.68	39.26	32.34	23.85	26.18	29.91	34.56	38.18	14.29	31.86	29.91
Fam110a	1_Strict_Shared_Up	33.48	18.27	22.84	66.19	37.99	56.42	47.07	47.57	56.05	40.14	75.99	50.52	64.03	22.84	47.57	56.05
Gm38560	1_Strict_Shared_Up	6.73	13.47	4.62	19.99	11.71	31.07	24.82	17.82	30.6	19.07	24.67	19.34	15.68	6.73	19.99	19.34
Mgmt	1_Strict_Shared_Up	330.21	215.59	284.1	680.76	601.65	580.99	782.39	661.03	702.32	695.12	651.54	639.85	719.79	284.1	661.03	695.12
Gm75621	1_Strict_Shared_Up	72.17	18.14	25.56	53.21	102.39	87.28	83.83	50.4	104.18	57.97	89.66	92.88	82.09	25.56	83.83	89.66
Ppp2r1b	1_Strict_Shared_Up	483.01	257.16	331.52	773.65	825.88	748.56	679.19	803.28	747.42	777.51	1084.54	885.45	870.51	331.52	773.65	870.51
Cgref1	1_Strict_Shared_Up	29.25	61.81	15.61	89.71	64.76	148.71	82.85	67.33	127.19	51.65	108.17	70.18	94.61	29.25	82.85	94.61
H2ac24	1_Strict_Shared_Up	26.66	33.84	10.28	51.22	56.39	53.83	34	72.58	48.63	53.81	49.22	49.11	83.94	26.66	53.83	49.22
Usp18	1_Strict_Shared_Up	61.68	59.22	61.01	150.22	112.86	144.07	189.99	131.77	185.64	100.06	162.09	141.79	159.35	61.01	144.07	159.35
Aen	1_Strict_Shared_Up	179.21	278.21	240.01	854.57	577.3	627.49	647.32	724.41	621.04	584.92	644.96	509.67	556.98	240.01	647.32	584.92
Serpine1	1_Strict_Shared_Up	42.86	39.64	8.75	106.69	42.69	131.62	70.83	68.89	65.95	61.04	69.06	78.22	76.97	39.64	70.83	69.06
Gm70432	1_Strict_Shared_Up	9.91	13.97	10.45	38.43	38.16	28.12	21.2	15.69	36.44	20.34	26.49	32.23	29.59	10.45	28.12	29.59
Omd	1_Strict_Shared_Up	169.06	112.62	137.39	230.45	276.63	369.8	255.48	301.39	342.39	353.22	356.89	296.24	299.98	137.39	276.63	342.39
Cdk2ap1rt	1_Strict_Shared_Up	0	8.44	10.99	24.3	11.27	27.41	20.32	25.23	24.31	17.53	23.65	24.82	11	8.44	24.3	23.65
Adora1	1_Strict_Shared_Up	432.99	138.64	138.62	505.39	597.03	650.21	761.55	598.26	600.67	442.25	533.49	566	634.94	138.64	598.26	566
Aldh3a2	1_Strict_Shared_Up	14320.4	7815.52	10188.5	17093.3	19865.7	23056.5	26129.2	25544.1	23633	23878.7	30165.3	24567.2	28565	10188.5	23056.5	24567.2
H1f3	1_Strict_Shared_Up	236.09	204.79	115.62	322.82	407.82	382.78	379.24	343.14	423.03	329.43	437.08	383.42	605.92	204.79	379.24	423.03
Degs1l	1_Strict_Shared_Up	558.86	202.61	290.87	564.22	788.73	923.25	808.04	795.92	984.43	770.52	747.22	729.44	881.72	290.87	795.92	770.52
Ly6a	1_Strict_Shared_Up	48.43	47.81	33.26	140.44	76.4	100.65	98.63	90.04	104.72	97.1	85.54	79.56	133.84	47.81	98.63	97.1
Gbp2	1_Strict_Shared_Up	90.96	69.82	82.54	234.4	117.18	206.18	176.27	138.04	172.98	161.96	260.7	126.71	234.14	82.54	176.27	172.98
Nqo1	1_Strict_Shared_Up	131.22	60.64	111.37	184.17	216.35	217.82	229.55	207.46	243.86	205.75	131.33	251.85	339.86	111.37	216.35	243.86
Ifit3	1_Strict_Shared_Up	134.63	145.83	135.45	317.59	191.55	355	353.86	204.3	446.72	246.93	281.1	281.18	403.27	135.45	317.59	281.18
Tmem237	1_Strict_Shared_Up	80.03	36.49	38.57	88.78	100.11	99.85	112.27	79.23	117.17	93.01	80.31	111.38	158.52	38.57	99.85	111.38
Tmem43	1_Strict_Shared_Up	243.49	206.67	246.8	613.42	485.53	566.4	468.55	483.56	534.49	465.08	623.11	480.79	638.73	243.49	485.53	534.49
Gm42879	1_Strict_Shared_Up	16.84	10.74	8.25	24.26	27.04	25.87	29.98	21.3	35.43	16.87	28.28	22.04	21.34	10.74	25.87	22.04
Adissp	1_Strict_Shared_Up	70.56	23.05	33.39	57.64	59.31	105.57	98.92	60.52	83.91	75	85.05	100.83	92.57	33.39	60.52	85.05
Myo5a	1_Strict_Shared_Up	13.25	35.93	15.74	66.51	29.47	58.17	79.77	45.56	48.17	66.26	41.52	55.42	45.76	15.74	58.17	48.17
Gna14	1_Strict_Shared_Up	107.57	80.69	66.74	205.79	149.48	318.06	207.32	142.61	274.92	132.19	153.46	210.39	183.62	80.69	205.79	183.62
Osbpl5	1_Strict_Shared_Up	102.3	42.41	72.47	134.34	139.68	101.54	184.7	133.44	179.07	226.12	68.99	129.82	180.73	72.47	134.34	179.07
Lpl	1_Strict_Shared_Up	227.66	168.28	186.13	390.71	217.78	614.71	323.59	516.7	428.13	304.1	419.84	374.56	680.99	186.13	390.71	419.84
Pdzrn3	1_Strict_Shared_Up	114.93	71.78	159.01	290.73	224.46	201.72	190.95	272.13	199.12	261.76	270.41	315.97	277.49	114.93	224.46	270.41
Adrb3	1_Strict_Shared_Up	3.31	32.81	18.02	66.08	48.95	46.21	41.88	41.5	40.84	42.8	33.6	59.68	41.47	18.02	46.21	41.47
Them6	1_Strict_Shared_Up	20.2	24.56	17.19	48.55	51.83	68.96	51.18	42.6	59.75	36.43	55	35.83	41.98	20.2	51.18	41.98
Angptl8	1_Strict_Shared_Up	177.81	142.91	72.09	312.85	209.64	544.6	374.13	199.56	373.18	198.84	328.1	176	336.3	142.91	312.85	328.1
Il1rn	1_Strict_Shared_Up	61.9	72.69	20.9	149.5	82.86	109.99	119.7	105.51	139.77	81.74	60.48	112.9	155.54	61.9	109.99	112.9
Fam78a	1_Strict_Shared_Up	2.91	17.21	14.5	32.23	17.5	36.7	35.18	29.87	31.99	40.52	21.78	18.21	35.92	14.5	32.23	31.99
Slc16a6	1_Strict_Shared_Up	54.5	52.17	47.74	126.61	73.57	115.45	112.86	89.08	54.7	107.98	124.42	123.26	150.69	52.17	112.86	123.26
Gm17767	1_Strict_Shared_Up	10.64	16.07	10.76	20.73	19.83	33.37	22.76	32.47	27.22	16.85	34.72	27.69	33.06	10.76	22.76	27.69
Gm56765	1_Strict_Shared_Up	6.72	13.82	32.99	58.74	42.82	43.86	48.61	39.44	51.42	47.21	41.97	35.87	48.82	13.82	43.86	47.21
Tlr5	1_Strict_Shared_Up	159.2	141.86	172.41	249.67	366.87	392.92	451.44	291.89	375.31	302.86	265.13	450.1	328.72	159.2	366.87	328.72
Ces2e	1_Strict_Shared_Up	6187.31	3902.87	4540.28	10016	9054.31	11033.8	10970.9	10212.6	10297	10092.6	11537.2	10169	10838.6	4540.28	10212.6	10297
Exoc4	1_Strict_Shared_Up	678.56	547.66	685.87	1569.94	1218.65	1695.26	1608.3	1212.42	1266.35	1340.22	1436.13	1455.1	1395.17	678.56	1569.94	1395.17
Atp8b2	1_Strict_Shared_Up	37.43	35.2	45.92	89.45	89.71	53.07	90.37	92.68	93.16	114.4	94.97	67.79	61.32	37.43	89.71	93.16
Ephx1	1_Strict_Shared_Up	6071.45	5017.72	5732.19	11757.5	9718.08	13155.6	12830.2	12007.8	12213.4	11971	12318.8	10332.2	13064	5732.19	12007.8	12213.4
Mbl2	1_Strict_Shared_Up	3739.25	3770.75	4068.38	10815.9	6416.96	8533.03	10757.8	7599.31	8490.35	8931.31	8061.37	6315.39	8240.05	3770.75	8533.03	8240.05
Pomk	1_Strict_Shared_Up	124.71	82.85	93.57	189.81	189.28	207.02	190.23	179.85	207.01	176.16	182.06	187.22	210.83	93.57	189.81	187.22
Gm9958	1_Strict_Shared_Up	16.49	10.52	20.88	31.69	24.28	38.24	25.06	38.63	44.23	23.13	32.93	26.1	34.31	16.49	31.69	32.93
Ccdc142os	1_Strict_Shared_Up	4.52	10.56	13.04	24.73	28.37	28.19	26.86	26.57	22.25	21.31	25.07	22.08	21.86	10.56	26.86	22.08
Plek	1_Strict_Shared_Up	131.71	89.41	126.34	413.71	129.85	265.22	205.54	173.36	226.59	241.5	246.61	154.95	283.42	126.34	205.54	241.5
Snhg15	1_Strict_Shared_Up	124.26	34.3	75.77	178.83	92.62	203.91	161.21	132.28	131.82	141.28	158.62	124.78	127.8	75.77	161.21	131.82
Coro1a	1_Strict_Shared_Up	83.58	63.93	53.82	193.54	112.28	161.4	114.84	97.38	135.25	114.04	167.73	93.25	133.8	63.93	114.84	133.8
Sprr1a	2_Fructose_Specific_Up	0	0	0	2.03	0	10.94	1.77	8.67	11.81	2.02	10.64	13.82	13.71	0	2.03	11.81
Zfp990	2_Fructose_Specific_Up	2.64	0	0	0	1.76	4.83	9.46	1.85	7.67	11.87	1.77	16.56	11.06	0	1.85	11.06
Pacrg	2_Fructose_Specific_Up	0	0	0.89	5.26	0	14.5	2.29	2.56	23.86	5.26	12.06	10.01	12.51	0	2.56	12.06
Gm68572	2_Fructose_Specific_Up	0	1.54	2.05	2.04	0	10.14	7.13	18.13	11.11	36.98	51.5	38.83	30.05	1.54	7.13	36.98
Gm53794	2_Fructose_Specific_Up	0	0	4.82	0	4.51	36.85	4.41	34.71	15.28	24.97	42.82	41.32	12.4	0	4.51	24.97
Gins2	2_Fructose_Specific_Up	0	3.86	1.54	3.62	4.04	17.88	6.41	26.54	24.78	6.04	14.81	50.6	36.68	1.54	6.41	24.78
Gpnmb	2_Fructose_Specific_Up	30.06	6.08	4.96	25.37	19.13	170.81	25.89	61.36	148.64	61.15	45.62	55.5	169.95	6.08	25.89	61.15
Kifc1	2_Fructose_Specific_Up	5.84	0	2.01	9.05	2.19	8.83	11.31	4.1	14.79	12.24	10.34	9.01	17.9	2.01	8.83	12.24
Hr	2_Fructose_Specific_Up	0	29.7	8.98	21.94	12.25	36.24	16.09	66.74	31.47	100.3	183.05	64.01	84.93	8.98	21.94	84.93
Cyp2a4	2_Fructose_Specific_Up	13.46	4.61	4.81	40.46	4.51	4.7	30	37.86	27.1	65.44	11.46	28.49	105.29	4.81	30	28.49
Gm56970	2_Fructose_Specific_Up	0	1.95	1.31	0	5.86	5.47	8.43	8.75	8.43	10.88	14.32	3.51	13.28	1.31	5.86	10.88
Cdc20	2_Fructose_Specific_Up	6.69	6.86	7.52	2.01	8.96	11.68	2.63	22.74	13.12	14.08	32.65	52.96	101.52	6.86	8.96	32.65
Gm11832	2_Fructose_Specific_Up	8.61	2.45	2.35	0	5.52	7.36	10.79	15.22	4.15	7.49	55.44	18.07	27.3	2.45	7.36	18.07
Fignl1	2_Fructose_Specific_Up	0	4.53	2.71	9.4	4.44	13.86	10.42	6.61	16.16	30.05	7.83	11.76	25.13	2.71	9.4	16.16
Ckap2	2_Fructose_Specific_Up	9.02	12.17	7.37	12.6	8.05	14.69	11.8	28.16	22.94	40.32	37.09	51.23	122.15	9.02	12.6	40.32
Adig	2_Fructose_Specific_Up	3.81	2.31	2.07	6.44	5.34	9.75	6.92	10.31	7.13	11.61	13.87	19.33	18.39	2.31	6.92	13.87
Fam83a	2_Fructose_Specific_Up	7.38	8.05	3.02	42.85	11.52	27.71	6.44	15.97	41.83	14.79	18.44	53.22	25.16	7.38	15.97	25.16
Npnt	2_Fructose_Specific_Up	12.39	1.38	10.83	20.24	12.2	13.35	10.13	47.93	3.41	47.19	62.98	33.13	43.65	10.83	13.35	43.65
Hmmr	2_Fructose_Specific_Up	3.04	6.92	9.94	3.64	20.32	12.02	18.27	35.08	15.66	15.22	35.47	42.21	75.81	6.92	18.27	35.47
Gm29458	2_Fructose_Specific_Up	13.13	0.62	3.09	3.29	10.01	9.54	14.64	6.48	26.53	11.53	11.05	8.36	15.77	3.09	9.54	11.53
Tnfrsf23	2_Fructose_Specific_Up	2.15	4.9	5.75	13.07	5.75	26.29	13.64	10.58	20.23	29.53	13.7	19.35	34.54	4.9	13.07	20.23
Dlgap5	2_Fructose_Specific_Up	1.99	7.23	3.96	4.98	0	18.66	4.7	12.48	15.63	16.61	5.66	16.95	62.09	3.96	4.98	16.61
Gm58579	2_Fructose_Specific_Up	3.31	6.86	6.86	12.49	4.56	28.71	9.89	3.92	35.25	28.12	49.77	13.1	23.55	6.86	9.89	28.12
Kif2c	2_Fructose_Specific_Up	0	7.59	1.88	3.68	10.26	11.42	5.61	7.9	6.96	16.04	18.53	16.71	31.35	1.88	7.9	16.71
Gm50323	2_Fructose_Specific_Up	3.29	19.77	3.31	11.85	22.02	16.74	21.54	23.9	33.27	31.58	49.96	31.42	74.48	3.31	21.54	33.27
Acnat2	2_Fructose_Specific_Up	191.34	411.72	378.38	1182.39	1354.13	239.54	576.74	1653.36	437.66	1978.9	1464.33	1668.83	2043.29	378.38	1182.39	1668.83
H2ac11	2_Fructose_Specific_Up	0	6.16	5.48	0	15.79	16.39	8.95	24.46	25.71	15.47	18.18	19.46	32.77	5.48	15.79	19.46
Pbk	2_Fructose_Specific_Up	0	5.84	3.49	11.97	5.71	17.92	5.22	10.67	3.52	10.83	16.46	28.44	30.82	3.49	10.67	16.46
Slc34a2	2_Fructose_Specific_Up	0	11.43	7.36	13.51	3.71	21.3	5.07	13.64	2.86	56.07	44.1	33.99	23.83	7.36	13.51	33.99
Gm15163	2_Fructose_Specific_Up	3.36	2.3	2.06	6.08	15.78	5.48	4.42	5.52	11.81	15.51	12.21	1.84	11.69	2.3	5.52	11.81
Gm56760	2_Fructose_Specific_Up	0	7.83	4.51	6.72	7.79	18.2	16.33	15.15	29.13	9.18	9.28	26.65	32.44	4.51	15.15	26.65
Cdk1	2_Fructose_Specific_Up	6.31	16.62	19.29	13.32	33.59	20.67	20.01	29.9	46.67	68.16	44.34	62.82	120.3	16.62	20.67	62.82
Cenpf	2_Fructose_Specific_Up	8.06	11.61	10.97	16.07	8.97	65.55	9.11	46.29	35.68	28.71	40.06	46.43	75.9	10.97	16.07	40.06
Scd3	2_Fructose_Specific_Up	0	6.9	2.75	6.06	11.27	9.41	8.81	13.41	16.67	21.6	16.83	14.68	17.91	2.75	9.41	16.83
Nusap1	2_Fructose_Specific_Up	16.13	4.63	10.85	37.67	11.33	15.41	7.97	29.89	19.64	41.16	31.78	37.41	67.12	10.85	15.41	37.41
Prc1	2_Fructose_Specific_Up	11.16	12.7	11.8	18.65	30.11	36.32	10.59	23.35	22.46	41.56	48.78	43.01	92.81	11.8	23.35	43.01
Phospho1	2_Fructose_Specific_Up	64.59	34.81	25.29	53.16	67.09	101.25	103.42	136.61	81.27	89.17	319.61	142.56	161.71	34.81	101.25	142.56
Galnt3	2_Fructose_Specific_Up	2.31	3.15	5.18	12.96	3.09	7.52	6.03	23.86	17.31	16.04	17.07	8.17	19.86	3.15	7.52	17.07
A130051J06Rik	2_Fructose_Specific_Up	7.39	1.57	2.52	4.74	3.3	8.17	6.73	10.12	9.98	10.06	20.77	4.95	15.46	2.52	6.73	10.06
Fsd2	2_Fructose_Specific_Up	6.74	3.07	5.5	16.15	11.27	14.9	7.92	8.68	17.37	22.95	13.01	17.44	21.36	5.5	11.27	17.44
Knstrn	2_Fructose_Specific_Up	8.81	7.95	4.36	12.12	13.67	18.43	6.83	21.97	6.18	14.72	21.42	29.34	52.73	7.95	13.67	21.42
H3c8	2_Fructose_Specific_Up	0	3.84	3.42	6.13	0	9.36	6.25	2.36	12.5	14.79	6.81	10.17	16.39	3.42	6.13	12.5
Gm58776	2_Fructose_Specific_Up	11.87	1.27	2.85	3.36	14.52	6.47	8.79	7.24	6.66	12.31	17.06	20.42	8.49	2.85	7.24	12.31
Gm14412	2_Fructose_Specific_Up	3.36	3.07	7.56	10.12	9.01	9.4	9.71	14.2	20.15	16.87	22.91	18.38	20.64	3.36	9.71	20.15
Ppp1r36dn	2_Fructose_Specific_Up	9.46	8.92	10.33	38.94	3.22	47.64	16.38	7.81	25.41	62.71	24.63	27.28	42.45	9.46	16.38	27.28
Spon2	2_Fructose_Specific_Up	69.41	55.72	54.82	28.42	88.58	136.3	59.5	170.92	70.95	76.88	555.5	204.99	221.9	55.72	88.58	204.99
Nuf2	2_Fructose_Specific_Up	3.36	4.97	4.53	8.06	0	14.06	11	15.74	13.54	14.13	16.76	11.9	28.91	4.53	11	14.13
Gm64979	2_Fructose_Specific_Up	5.12	7.61	2.62	13.91	7.78	8.95	11.46	3	26.05	17.98	16.26	9.12	25.84	5.12	8.95	17.98
Gm1968	2_Fructose_Specific_Up	0	3.67	7.72	11.71	7.41	18.42	11.12	7.78	20.39	13.87	26.04	11.15	15.46	3.67	11.12	15.46
Trem2	2_Fructose_Specific_Up	20.52	4.64	9.28	7.82	16.69	43.11	21.47	24.82	50.6	25.27	32.21	18.86	43.01	9.28	21.47	32.21
Cyp2c39	2_Fructose_Specific_Up	47.13	28.4	44.01	58.66	54.09	33.7	99.7	107.28	94.48	192.29	123.76	125.87	144.53	44.01	58.66	125.87
Mug-ps1	2_Fructose_Specific_Up	0	19.94	30.96	36.33	29.29	69.01	47.54	38.65	61.82	36.45	103.29	82.58	59.95	19.94	38.65	61.82
Slc66a3	2_Fructose_Specific_Up	6.44	3.44	4.62	9.46	5.27	14.36	12.69	7.79	20.18	5.66	10.25	21.76	18.77	4.62	9.46	18.77
Mdfic2	2_Fructose_Specific_Up	2.65	5.77	6.78	6.35	3.54	14.22	13.15	18.94	21.84	8.49	25.1	15.58	22.82	5.77	13.15	21.84
Gm69483	2_Fructose_Specific_Up	9.48	3.6	10.73	12.3	16.93	8.83	12.43	19.26	19.66	25.29	23.32	29.19	30.52	9.48	12.43	25.29
Gm36041	2_Fructose_Specific_Up	138.88	73.52	66.94	125.54	243.66	158.18	227.4	214.7	131.83	161.65	730.96	284.57	222.84	73.52	214.7	222.84
Mroh2a	2_Fructose_Specific_Up	14.89	9.92	32.86	9.65	13.26	62.97	74.74	63.66	61.26	67.36	61.47	67.74	65.41	14.89	62.97	65.41
Gstm3	2_Fructose_Specific_Up	242.1	204.99	166.32	275.46	331.3	616.46	339.33	388.09	990.09	380.41	512.78	488.34	1013.55	204.99	339.33	512.78
H2bc23	2_Fructose_Specific_Up	6.2	11.24	9.34	16.95	4.71	34.4	12.94	23.92	21.8	33.15	22.55	29.11	47.45	9.34	16.95	29.11
Gm31813	2_Fructose_Specific_Up	4.88	28.09	7.61	33.43	29.1	23.07	43.72	22	22.87	74.05	26.16	46.78	46.31	7.61	29.1	46.31
Bnip5	2_Fructose_Specific_Up	3.21	6.57	3.93	3.84	6.43	4.48	5.03	9.01	25.23	17.34	18.2	6.11	13.11	3.93	5.03	17.34
Ndc80	2_Fructose_Specific_Up	4.08	7.26	2.85	6.09	5.23	13.77	6.61	10.89	11.79	14.82	14.02	11.34	27.11	4.08	6.61	14.02
D17H6S56E-5	2_Fructose_Specific_Up	43.62	65.46	67.39	139.7	88.59	68.44	57.2	179.65	114.65	138.96	104.54	172.68	391.07	65.46	88.59	138.96
Cxcl9	2_Fructose_Specific_Up	116.86	46.29	74.36	135.41	107.62	246.65	118.86	113.69	145.52	300.92	273.61	176.2	221.6	74.36	118.86	221.6
Gal3st1	2_Fructose_Specific_Up	82.95	20.42	42.02	50.44	44.42	86.6	108.32	110.21	119.77	147.21	147.08	100.51	147.38	42.02	86.6	147.08
Nol3	2_Fructose_Specific_Up	10.11	4.6	6.19	10.1	9.01	13.33	12.33	11.04	17.37	14.85	13	20.19	21.36	6.19	11.04	17.37
Gm59496	2_Fructose_Specific_Up	13.33	17.69	67.15	73.74	36.09	47.59	82.3	85.2	123.66	167.48	51.5	62.07	92.15	17.69	73.74	92.15
Gm45589	2_Fructose_Specific_Up	43.63	16.63	34.21	29.78	70.56	70.25	61.39	67.55	64.66	57.52	121.71	97.36	89.31	34.21	67.55	89.31
Fermt1	2_Fructose_Specific_Up	12.75	5.8	12.36	19.08	19.17	11.86	14.98	20.13	36.83	37.01	21.7	26.02	18.24	12.36	19.08	26.02
Acot2	2_Fructose_Specific_Up	212.17	245.55	204.95	392.15	414.64	284.54	544.01	522.99	457.82	822.56	548.01	562.99	752.53	212.17	414.64	562.99
Ocstamp	2_Fructose_Specific_Up	10.11	14.58	12.38	22.21	9.01	28.23	9.69	19.72	24.31	33.07	52.02	35.79	37.2	12.38	19.72	35.79
Gm26714	2_Fructose_Specific_Up	0	5.52	9.59	3.68	21.17	15.18	9.62	9.8	15.03	24.12	12.65	16.21	20.42	5.52	9.8	16.21
Dtl	2_Fructose_Specific_Up	6.72	9.09	7.32	23.34	4.25	18.33	14.68	13.79	21.55	13.13	16.69	21.49	38.54	7.32	14.68	21.49
H3c3	2_Fructose_Specific_Up	23.42	13.84	19.89	14.28	31.57	39.85	12.46	37.07	36.14	47.14	45.54	33.26	94.48	19.89	31.57	45.54
Insig2	2_Fructose_Specific_Up	3212.08	4829.95	4667.49	5135.05	5659.91	4731.74	3854.65	10669.2	4018.37	11281.6	20433.6	13146.1	10229	4667.49	5135.05	11281.6
9030619P08Rik	2_Fructose_Specific_Up	65.96	95.75	116.48	103.68	188.74	174.47	177.2	221.09	134.63	393.02	289.27	227.07	272.84	95.75	177.2	272.84
Fam131c	2_Fructose_Specific_Up	13.45	15.35	16.5	20.25	45.07	23.5	25.61	39.44	39.6	33.73	54.2	37.69	49.52	15.35	25.61	39.6
Serpinb6b	2_Fructose_Specific_Up	35.83	90.39	101.01	142.63	61.71	90.52	74.43	140.98	103.78	217.5	299.73	214.98	249.4	90.39	90.52	217.5
Mki67	2_Fructose_Specific_Up	50.26	59.99	59.6	65.74	50.35	65.74	51.61	150.52	141.19	95.55	116.91	172.51	256.14	59.6	65.74	141.19
Ncapg2	2_Fructose_Specific_Up	12.87	42.13	28.79	46.44	66.12	46.86	54.48	48.32	77.99	74.23	70.08	59.41	123.3	28.79	48.32	74.23
Cyp2c38	2_Fructose_Specific_Up	876.07	455.73	948.61	1104.99	1160.48	617.05	1416.78	1699.13	1349.77	2536.86	2435.6	1803.91	2182.08	876.07	1160.48	2182.08
Top2a	2_Fructose_Specific_Up	38.96	75.37	52.02	70.56	92.51	72.83	38.9	125.26	111.87	94.61	111.85	102.65	338.23	52.02	72.83	111.85
Neu2	2_Fructose_Specific_Up	31.08	24.06	24.46	53.16	36.06	36.95	56.75	26.9	73.02	62.27	69.32	74.09	63.23	24.46	36.95	69.32
Sgo2a	2_Fructose_Specific_Up	9.97	10.58	9.92	7.96	15.54	10.05	6.94	12.44	16.43	18.98	25.45	24.1	51.81	9.97	10.05	24.1
9430064I24Rik	2_Fructose_Specific_Up	6.74	7.67	8.25	8.08	11.27	13.33	18.51	8.68	22.23	12.15	29.06	16.53	23.42	7.67	11.27	22.23
Gm75798	2_Fructose_Specific_Up	16.8	24.57	21.99	16.22	42.82	31.32	53.06	41.02	53.5	29	48.05	62.57	95.54	21.99	41.02	53.5
Lamb3	2_Fructose_Specific_Up	118.94	197.91	116.07	152.72	269.27	160.05	278.31	406.2	254.43	442.15	419.84	423.03	370.53	118.94	269.27	419.84
Il2rg	2_Fructose_Specific_Up	17.52	22.32	15.1	28.65	17.59	43.66	33.95	29.85	29.56	47.58	56.18	51.44	56.91	17.52	29.85	51.44
4930458D05Rik	2_Fructose_Specific_Up	8.73	20.48	15.58	49.06	28.24	30.47	23.58	25.91	44.13	48.24	41.4	44.8	38.64	15.58	28.24	44.13
Nipa1	2_Fructose_Specific_Up	33.7	20.71	25.45	26.26	51.83	36.07	31.71	56.01	64.6	65.47	41.3	57.83	93.69	25.45	36.07	64.6
Sox6os	2_Fructose_Specific_Up	17.07	7.06	7.51	18.1	11.51	11.01	10.64	18.94	21.28	24.11	19.04	23.56	22.93	7.51	11.51	22.93
H2bc11	2_Fructose_Specific_Up	6.66	15.38	20.56	38.96	9.02	31.98	12.54	23.67	34.04	37.65	31.04	30.59	66.85	15.38	23.67	34.04
Gm13169	2_Fructose_Specific_Up	30.28	8.44	17.19	16.2	0	28.99	25.61	18.93	36.82	45.2	42.75	51.48	33.02	17.19	18.93	42.75
Nek2	2_Fructose_Specific_Up	62.15	48.79	65.1	45.85	86.08	65.62	64.06	131.03	111.24	141.62	162.28	146.18	165.34	62.15	65.62	146.18
Gm69171	2_Fructose_Specific_Up	10.03	7.69	15.77	24.48	27.06	18.75	16.03	18.14	24.32	22.22	28.08	23.1	45.18	10.03	18.75	24.32
Btk	2_Fructose_Specific_Up	5.99	6.85	10.3	4.44	10.02	12.54	14.25	8.8	15.46	17.98	19.62	34.11	17.56	6.85	10.02	17.98
H3c2	2_Fructose_Specific_Up	20.07	24.61	25.37	26.52	33.82	45.32	29.39	46.54	45.17	49.16	43.26	62.83	90.36	24.61	33.82	49.16
H2bc14	2_Fructose_Specific_Up	13.35	8.46	17.13	4.09	11.28	15.61	11.61	24.46	24.32	30.95	28.04	24.99	47.83	13.35	11.61	28.04
Gm71239	2_Fructose_Specific_Up	0	8.17	10.08	8.19	10.25	15.45	7.86	11.53	15.85	21.65	14.66	20.09	21.07	8.17	10.25	20.09
Flvcr2	2_Fructose_Specific_Up	80.89	46.03	86	72.7	110.41	63.52	137.4	179.06	96.56	222.73	144.57	158.78	197.04	80.89	110.41	158.78
Trim7	2_Fructose_Specific_Up	291.25	185.43	332.51	322.86	396.18	579.26	416.69	351.56	651.47	788.19	483.06	529.17	689.23	291.25	396.18	651.47
Gm47882	2_Fructose_Specific_Up	6.12	13.23	12.49	9.16	22.49	12.74	11.99	30.64	36.7	26.26	20.82	24.62	27.61	12.49	12.74	26.26
Arhgap44	2_Fructose_Specific_Up	12.65	8.55	8.31	9.47	15.16	10.74	13.22	19.24	20.97	13.68	18.74	22.38	28.51	8.55	13.22	20.97
Phf11b	2_Fructose_Specific_Up	20.17	14.59	15.12	18.24	15.78	32.89	22.99	19.72	30.57	37.09	30.51	32.2	48.12	15.12	19.72	32.2
Mthfr	2_Fructose_Specific_Up	154.36	170.03	201.78	171	156.51	170.75	169.7	209.06	166.82	442.38	760.65	312.44	322.31	170.03	170.75	322.31
Lgalsl	2_Fructose_Specific_Up	235.51	234.21	352.22	401.22	400.83	315.42	337.34	481.81	383.65	691.22	889.2	576.28	554.8	235.51	400.83	576.28
Xrcc3	2_Fructose_Specific_Up	32.47	48.74	64.93	88.62	156.54	52.23	46.45	62.07	123.99	92.53	86.18	135.68	104.83	48.74	62.07	104.83
Ciita	2_Fructose_Specific_Up	14.51	46.92	49.93	34.73	32.96	64.83	57.15	56.67	89.34	64.59	94.9	65.05	116.44	46.92	56.67	89.34
Tgtp2	2_Fructose_Specific_Up	94.25	48.78	77.39	70.21	87.86	152.39	94.86	86.21	151.21	125.73	192.49	77.67	220.51	77.39	87.86	151.21
Ulk4	2_Fructose_Specific_Up	18.28	11.61	7.9	19.84	14.33	14.47	9.49	12.28	19.07	22.27	20.87	22.75	25.33	11.61	14.33	22.27
Gm15535	2_Fructose_Specific_Up	24.36	15.11	16.19	32.07	26.82	26.78	14.7	24.02	30.21	38.52	51.24	27.07	28.53	16.19	26.78	30.21
Unc119	2_Fructose_Specific_Up	116.4	71.21	96.66	102.94	92.35	182.12	131.12	133.24	191.66	129.7	270.26	150.78	214.36	96.66	131.12	191.66
Ear2	2_Fructose_Specific_Up	20.1	45.35	49.4	50.89	36.07	92.27	39.98	63.89	68.8	75.46	69.93	78.43	126.12	45.35	50.89	75.46
Zfp982	2_Fructose_Specific_Up	158.55	138.3	171.23	157.54	226.26	178.5	154.23	289.3	264.89	337.03	260.15	419.85	296.05	158.55	178.5	296.05
Cd79b	2_Fructose_Specific_Up	20.32	14.16	13.15	14.29	31.79	26.03	19.6	12.71	31.75	35.57	26.12	19.76	33.93	14.16	19.6	31.75
Gstm2	2_Fructose_Specific_Up	756.07	479.42	404.55	596	834.93	642.53	764.69	891.51	1027.05	747.51	1076.13	993.54	1560.37	479.42	764.69	1027.05
Smim1	3_Strict_Shared_Down	51.89	84.33	60	19.54	27.29	21.98	33.07	29.67	34.96	27.97	31.44	30.04	45.15	60	27.29	31.44
Zfand4	3_Strict_Shared_Down	695.06	567.82	630.85	273.79	270.4	306.11	204.33	317.76	279.3	509.42	303.71	279	198.86	630.85	273.79	279.3
Ankrd33b	3_Strict_Shared_Down	824.46	1547.16	1507.17	630.5	725.98	530.96	488.74	738.87	596.28	889.56	590.98	604.64	560.49	1507.17	630.5	596.28
Gm5424	3_Strict_Shared_Down	70.6	53.75	54.98	18.23	42.82	28.2	21.22	28.4	36.83	35.75	19.07	31.27	21.31	54.98	28.2	31.27
Gm26316	3_Strict_Shared_Down	2962.7	1346.43	1251.33	675.6	534.45	1224.96	697.14	416.07	802.88	912.61	1037.09	757.76	1074.98	1346.43	675.6	912.61
Aph1b	3_Strict_Shared_Down	45.18	120.94	82.79	36.7	38.82	34.53	35.38	42.07	34.57	58.14	40.15	39.33	41.55	82.79	36.7	40.15
Csad	3_Strict_Shared_Down	5177.64	4191.07	3471.21	1504.68	1756.8	2915.56	1897.51	1618.7	1615.35	2170.74	3196.34	1383.9	2199.64	4191.07	1756.8	2170.74
Tmco6	3_Strict_Shared_Down	190.86	136.99	133.1	68.17	86.92	66.92	53.57	67.22	71.76	78.97	79.31	69.03	64.96	136.99	67.22	71.76
Gm44829	3_Strict_Shared_Down	26.96	47.57	39.9	26.26	15.77	17.25	15.86	22.09	20.84	21.6	20.65	22.03	15.16	39.9	17.25	20.84
Rpp40	3_Strict_Shared_Down	323	268.44	231.23	132.05	177.1	160.99	77.98	105.65	175.21	137.69	126.93	96.19	131.73	268.44	132.05	131.73
Gm23511	3_Strict_Shared_Down	112.59	65.29	52.57	48.01	18.4	48.36	33	27.3	29.43	44.28	44.11	29.27	31.32	65.29	33	31.32
Unc13b	3_Strict_Shared_Down	366.37	378.62	408.48	101.12	192.98	219.59	84.33	205.23	134.52	168.77	281.01	175.06	182.31	378.62	192.98	175.06
Rny3	3_Strict_Shared_Down	2500.69	924.42	940.27	610.59	800.17	779.64	684.15	648.12	782.34	679.82	656.82	486.63	922.07	940.27	684.15	679.82
Zfp395	3_Strict_Shared_Down	401.92	256.83	156.5	75.05	112.1	94.44	154.41	60.91	99.65	170.85	128.85	127	117.19	256.83	94.44	127
Gm23143	3_Strict_Shared_Down	165.61	86.85	110.44	49.56	51.89	81.82	22.87	45.84	45.65	60.38	60.93	47.65	69.99	110.44	49.56	60.38
Snora21	3_Strict_Shared_Down	2445.87	1114.71	1260.3	976.25	378.39	1088.8	539.68	305.01	711.23	954.51	839.37	598.6	755.22	1260.3	539.68	755.22
Acacb	3_Strict_Shared_Down	1740.41	2506.69	2829.34	999.92	905.92	510.26	699.49	902.84	1221.67	1943.87	691.07	1118.73	689.4	2506.69	902.84	1118.73
Tbc1d8	3_Strict_Shared_Down	416.23	1205.38	750.21	500.87	451.07	248.07	220.94	523.08	398.11	593.4	294.67	322.5	294.8	750.21	451.07	322.5
Hecw2	3_Strict_Shared_Down	592.98	232.42	324	208.05	174.77	102.25	187.91	227.77	179.09	242.3	168.94	146.21	144.61	324	187.91	168.94
Pstpip2	3_Strict_Shared_Down	317.24	239.18	239.09	94.9	98.47	130.92	130.98	71.24	163.13	121.88	123.21	113.26	100.29	239.18	98.47	121.88
Slc25a27	3_Strict_Shared_Down	33.51	37.4	41.51	30.63	23.31	12.75	9.19	16.01	13.46	24.16	16.04	15.6	20.94	37.4	16.01	16.04
Gm25202	3_Strict_Shared_Down	69.44	34.25	31.47	22.94	13.7	19.41	12.56	8.6	15.17	21.44	26.91	12.21	22.81	34.25	13.7	21.44
Sc5d	3_Strict_Shared_Down	15835.5	8593.62	8824.99	4896.47	5513.73	6381.61	5990.56	4282.54	6633.59	5039.04	5493.33	4544.98	4478.01	8824.99	5513.73	5039.04
Pltp	3_Strict_Shared_Down	1456.18	1086.96	1525.15	629.46	544.76	542.95	574.35	631.64	670.15	576.57	605.88	587.77	751.55	1456.18	574.35	605.88
Zfp941	3_Strict_Shared_Down	31.83	31	44.8	10.7	23.07	11.78	15.35	18.64	13.5	13.56	23.65	21.74	13.39	31.83	15.35	13.56
Rnu1b1	3_Strict_Shared_Down	188.71	86.56	96.94	77.24	25.3	100.58	46.4	39.79	46.56	61.04	68.09	47.19	59.33	96.94	46.4	59.33
Agap2	3_Strict_Shared_Down	28.52	46.89	34.28	10.89	24.31	12.69	19.15	9.46	23.93	22.17	14.92	11.55	15.76	34.28	12.69	15.76
Snord17	3_Strict_Shared_Down	2754.15	1455.68	1602.65	894.69	872.32	1150.59	983.91	641.7	814.95	993.21	1035.62	745.64	901.48	1602.65	894.69	901.48
Gm25053	3_Strict_Shared_Down	254.24	160.89	174.32	104.17	58.2	122.59	67.94	52.05	101.48	97.67	90.28	64.58	92.83	174.32	67.94	92.83
Rnu1a1	3_Strict_Shared_Down	739315	358451	406802	249575	215758	322214	199150	189688	221592	269523	248376	189280	231435	406802	215758	231435
Snora41	3_Strict_Shared_Down	110.39	51.09	66.83	52.09	9.31	28.47	27	14.76	32.05	37.05	28.26	33.24	37.91	66.83	27	33.24
Gm26110	3_Strict_Shared_Down	148.98	71.37	117.42	39.66	41.4	67.83	49.97	47.59	45.87	53.67	55.71	37.75	52.66	117.42	47.59	52.66
Gm23330	3_Strict_Shared_Down	877.54	480.6	645.81	369.48	276.04	435.22	263.12	268.37	289.53	337.49	337.39	240.75	294.51	645.81	276.04	294.51
Gm23686	3_Strict_Shared_Down	490.1	242.96	333.14	173.26	135.72	219.95	133.79	125.6	163.59	171.76	169.47	128.4	156.58	333.14	135.72	163.59
Gm23925	3_Strict_Shared_Down	3990.86	2172.46	2572.78	1379.27	1534.13	1754.29	1140.98	1431.1	1319.89	1536.52	1421.7	1007.61	1288.45	2572.78	1431.1	1319.89
Gm47508	3_Strict_Shared_Down	30.33	32.99	22.7	4.04	22.53	7.84	7.93	12.62	14.59	13.5	16.82	10.1	8.95	30.33	7.93	13.5
Gm75192	3_Strict_Shared_Down	20.21	44.5	37.83	4.04	11.27	14.9	17.62	14.2	18.06	14.17	14.53	17.44	18.6	37.83	14.2	17.44
Snora5c	3_Strict_Shared_Down	2224.35	1166.98	1525.41	873.79	775.79	975.18	637.08	717.95	685.63	853.77	759.9	615.73	748.61	1525.41	775.79	748.61
Cdc42ep5	3_Strict_Shared_Down	12.74	45.89	85.64	13.47	23.52	16.34	17.63	20.2	22.81	20.84	27.68	23.58	21.5	45.89	17.63	22.81
Snord33	3_Strict_Shared_Down	177.78	67.2	75.52	61.48	33.06	52.16	47.05	49.31	63.18	40.48	36.36	22.52	64.85	75.52	49.31	40.48
Gm13194	3_Strict_Shared_Down	19.91	30.68	37.78	6.19	11.3	13.99	7.21	9.44	11.79	16.75	16.71	13.02	11.52	30.68	9.44	13.02
Camk1d	3_Strict_Shared_Down	1417.06	1139.9	1348.58	269.32	898.56	250.29	434.51	645.19	491.92	544.6	860.17	515.8	485.2	1348.58	434.51	515.8
Gm29919	3_Strict_Shared_Down	205.86	307.33	226.26	66.6	104.18	149.05	112.94	95.64	127.11	72.72	134.57	114.64	105.24	226.26	104.18	114.64
Gm25813	3_Strict_Shared_Down	290.98	137.76	151.88	116.77	41.11	109.45	89.72	32.07	80.01	83.09	93.79	78.87	85.89	151.88	89.72	83.09
Gm25848	3_Strict_Shared_Down	352.09	100.28	121.29	93.94	115.68	84.09	65.25	97.41	76.48	83.34	71.74	91.85	84.52	121.29	93.94	83.34
Sorbs3	3_Strict_Shared_Down	224.64	423.06	327.62	154.24	182.47	116.89	169.17	195.42	157.4	180.16	101.9	127.59	162.89	327.62	169.17	157.4
Gm25818	3_Strict_Shared_Down	99.34	49.35	60.07	43.84	27.6	35.88	16.95	21.84	29.43	30.19	24.76	16.99	43.31	60.07	27.6	29.43
Snora16a	3_Strict_Shared_Down	176.75	92.87	132.67	62.56	41.81	72.59	60.38	45.89	61.05	61.27	66.59	35.1	59.05	132.67	60.38	61.05
Gm3787	3_Strict_Shared_Down	93.9	33.37	55.32	24.38	22.5	28.97	27.47	29.19	26.66	39.44	16.45	15.79	27.07	55.32	27.47	26.66
Gm22513	3_Strict_Shared_Down	200082	95808.2	110743	65552.7	70526.8	83105	53669.5	62383.3	56326.2	68685.2	64048.1	47963.5	58058.6	110743	65552.7	58058.6
Gm71569	3_Strict_Shared_Down	457.97	371.95	379.67	205.12	145.44	155.44	177.05	154.24	166.38	232.1	153.38	153.46	158.2	379.67	155.44	158.2
Avpr1a	3_Strict_Shared_Down	121.29	186.44	257.95	38.39	130.7	58.02	64.33	84.4	43.07	88.41	152.16	72.53	57.85	186.44	64.33	72.53
Gm25890	3_Strict_Shared_Down	8816.52	5707.42	5190.32	2747.07	2272.47	3824.4	2077.3	1727.45	2797.43	3183.06	3038.34	2142.59	2987.2	5707.42	2272.47	2987.2
Gm45294	3_Strict_Shared_Down	26.94	35.3	33.7	24.26	6.76	14.11	12.35	7.1	9.73	16.87	19.11	15.61	9.64	33.7	12.35	15.61
Gm23849	3_Strict_Shared_Down	289978	130856	135283	95764.9	41026.8	113080	70336.4	34453.9	76728.4	88738.9	89923.5	62715.9	80819.1	135283	70336.4	80819.1
Gm26505	3_Strict_Shared_Down	738.16	375.07	487.42	223.35	202.37	313.34	215.12	208.35	206.84	240.11	259.17	183.06	238.1	487.42	215.12	238.1
Gm23297	3_Strict_Shared_Down	2056.19	944.58	1182.22	736.82	478.95	938.9	524.26	489.97	579.35	723.35	649.57	408.89	614.37	1182.22	524.26	614.37
Gm25099	3_Strict_Shared_Down	4630.41	1662.52	1739.01	1113.04	778.29	1398.93	1148.41	688.38	1267.2	1192.02	1059.54	737.55	1452.52	1739.01	1113.04	1192.02
Gm23262	3_Strict_Shared_Down	8216.75	4291.79	5209.22	2805.44	2872.71	3300.53	2165.17	2460.42	2281.87	2944.71	2929.94	2170.29	2269.09	5209.22	2805.44	2281.87
Gm58466	3_Strict_Shared_Down	43.19	60.71	73.36	20.58	18.06	37.38	34.15	24.44	24.3	25.51	16.66	46.43	18.37	60.71	24.44	24.3
Cystm1	3_Strict_Shared_Down	69.35	100.27	116.24	37.73	30.66	48.16	48.02	41.14	45.91	37.34	53.56	34.66	39.56	100.27	41.14	39.56
Fdft1	3_Strict_Shared_Down	2499.84	1236.18	1369.08	573.62	592.63	780.95	923.65	482.12	976	816.3	645.09	557.66	609.4	1369.08	592.63	645.09
Gm25617	3_Strict_Shared_Down	190.68	71.68	72.35	29.17	27.94	58.53	36.58	19.42	42.73	48.5	39.25	42.74	51.64	72.35	29.17	42.74
Gm23238	3_Strict_Shared_Down	364.26	185.25	198.66	121.07	126.52	145.07	114.17	70.99	107.46	116.07	105.24	58.54	124.6	198.66	121.07	107.46
Gm25820	3_Strict_Shared_Down	526.63	250.46	276.71	179	158.87	219.05	147.93	127.35	143.84	161.27	137.62	117.91	151.64	276.71	158.87	143.84
Wdr97	3_Strict_Shared_Down	40.47	58.29	55.05	20.18	33.8	18.04	13.2	39.44	20.14	26.33	18.37	28.44	16.54	55.05	20.18	20.14
Gm52965	3_Strict_Shared_Down	97.57	210.33	135.42	95.13	56.34	86.19	66.22	58.37	75.73	74.2	48.1	54.23	61.91	135.42	66.22	61.91
Snora47	3_Strict_Shared_Down	139.85	61.61	79	37.56	32.48	64.61	33.32	37.36	41.69	39.03	29.74	35.09	37.47	79	37.36	37.47
Gm42777	3_Strict_Shared_Down	53.93	188.72	85.31	34.33	42.81	74.5	41.39	43.39	40.99	45.22	45.9	66.08	35.83	85.31	42.81	45.22
Star	3_Strict_Shared_Down	65.75	69.79	22.43	24.08	14.33	25.56	23.8	18.24	18.22	15.56	19.46	21.16	25.48	65.75	23.8	19.46
Bag2	3_Strict_Shared_Down	93.37	55.89	47.39	10.36	21.16	18.88	27.99	32.53	16.6	24.76	21.65	31.57	26.03	55.89	21.16	24.76
Snora28	3_Strict_Shared_Down	2351.37	846.84	1116.51	628.59	626.14	752.39	570.11	571.5	595.92	622.14	586.66	492.56	622.84	1116.51	626.14	595.92
Fads1	3_Strict_Shared_Down	9862.84	10023.6	10563.9	3249.65	4312.27	2383.72	4379.33	2967.71	4371.65	4298.41	4061.12	4236.44	3423.91	10023.6	3249.65	4236.44
Snora34	3_Strict_Shared_Down	895.73	284.49	378.53	214.9	178.65	281.3	169.25	127.64	178.85	223.44	225.37	172.62	224.79	378.53	178.65	223.44
Hsd17b7	3_Strict_Shared_Down	2298	2345	1996.23	857.31	1040.86	879.43	817.94	852.74	989.44	870.01	881.16	889.63	768.24	2298	857.31	881.16
Pck1	3_Strict_Shared_Down	67876.5	94424.8	90350.4	56986.1	32831.5	28234	34937	42793.6	29184.3	54170	31477.9	25162.7	27589.7	90350.4	34937	29184.3
9030616G12Rik	3_Strict_Shared_Down	208.5	369.05	297.5	111.48	68.29	119.57	143.09	117.5	134.28	127.62	149.89	54.31	118.61	297.5	117.5	127.62
Gulp1	3_Strict_Shared_Down	43.05	47.2	55.17	7.58	15.28	23.85	8.59	19.28	35.49	26.41	12.31	9.8	13.44	47.2	15.28	13.44
Snord22	3_Strict_Shared_Down	25159.8	13418.5	15005.3	7670.94	9139.47	12512	6239.55	7350.77	5892.38	8230.57	8052.44	6297.63	6266.81	15005.3	7670.94	6297.63
Ppargc1b	3_Strict_Shared_Down	152.89	277.74	177.68	37.26	138.13	120.93	105.66	61.25	101.57	77.73	66.25	59.33	92.09	177.68	105.66	77.73
Bud13	3_Strict_Shared_Down	52.33	219.1	370.85	140.76	98.09	85.31	96.66	95.92	86.57	104.26	82.03	71.03	78.83	219.1	96.66	82.03
Gm37621	3_Strict_Shared_Down	47.21	69.03	57.11	34.31	20.28	21.18	19.36	43.39	28.48	15.53	25.26	30.28	15.85	57.11	21.18	25.26
Gm24830	3_Strict_Shared_Down	1605.41	646.12	1183.74	298.5	206.97	645.38	319.55	270	316.42	513.07	530.71	312.34	542.9	1183.74	298.5	513.07
3110045C21Rik	3_Strict_Shared_Down	72.41	18.07	15.9	7.47	11.08	6.85	9.33	7.75	13.19	9.62	9.42	13.3	11.99	18.07	7.75	11.99
Snora57	3_Strict_Shared_Down	441.73	215.6	236.02	119.05	131.68	163.12	99.92	134	115.43	141.76	100.37	91.81	109.22	236.02	131.68	109.22
1810008I18Rik	3_Strict_Shared_Down	3867.79	1954.56	2073.39	949.11	1273.04	1560.52	1101.88	765.29	1516.09	805.23	1201.6	820.31	723.34	2073.39	1101.88	820.31
Acss2	3_Strict_Shared_Down	6933.88	3948.29	5066.74	1561.1	1981.6	1832.27	1798.34	1647.54	2493.43	2261.86	1689.9	1942.34	1781.92	5066.74	1798.34	1942.34
Snord104	3_Strict_Shared_Down	508.94	188.68	170.16	114.15	86.9	117.78	151.92	115.17	166.75	95.04	60.49	61.27	158.63	188.68	115.17	95.04
Gm24136	3_Strict_Shared_Down	36.42	24.3	32.77	16.7	11.5	19.49	12.49	9.36	9.58	14.76	12.38	4.72	15.33	32.77	12.49	12.38
Gm23245	3_Strict_Shared_Down	1061.29	440.21	567.39	298.12	262.64	356.86	245.62	281.49	225.84	302.37	305.7	245.74	216.97	567.39	281.49	245.74
Gm55431	3_Strict_Shared_Down	1180.45	409.58	449.59	325.3	255.67	351.65	293.42	146.29	255.28	265.96	316.64	204.63	237.6	449.59	293.42	255.28
Rny1	3_Strict_Shared_Down	2621.22	839.57	967.87	541.62	555.29	802.08	521.54	430.97	540.37	613.78	544.33	470.99	609.67	967.87	541.62	544.33
Gm24695	3_Strict_Shared_Down	23.45	10.93	11.07	3.96	4.71	4.2	4	2.35	5.64	5.69	4.75	3.75	5.11	11.07	4	5.11
Gm26330	3_Strict_Shared_Down	397.2	254.51	269.76	95.67	110.05	161.83	86.22	101.48	126.65	122.6	106.78	81.13	128.03	269.76	101.48	122.6
Snord15b	3_Strict_Shared_Down	18448.5	8392.8	9891.21	5265	5798.52	7555.7	4319.21	4073.9	3951.3	5438.15	5370.18	4152.02	3924.53	9891.21	5265	4152.02
Gm48203	3_Strict_Shared_Down	10.1	19.19	15.81	10.11	2.25	3.92	2.65	4.73	8.34	5.4	6.11	7.35	2.75	15.81	3.92	6.11
Col4a4	3_Strict_Shared_Down	18.15	20.61	27.25	3.1	5.2	4.22	16.23	7.28	4.81	7.79	7.65	11.67	11.72	20.61	5.2	7.79
B930059L03Rik	3_Strict_Shared_Down	16.5	20.76	14.16	4.95	9.2	6.4	6.48	6.44	7.37	9.95	6.24	3	5.62	16.5	6.44	6.24
Snord8	3_Strict_Shared_Down	186.86	139.59	170.84	53.27	68.94	91.55	61.67	71.58	65.7	68.88	68.31	38.14	57.8	170.84	68.94	65.7
Rad51c	3_Strict_Shared_Down	17.98	21.69	15.16	3.04	2.26	8.46	6.58	9.61	4.63	7.92	3.43	6.38	11.05	17.98	6.58	6.38
Gm25682	3_Strict_Shared_Down	86.1	28.09	55.3	20.87	25.3	14.04	24.97	15.6	18.48	20.13	19.35	16.99	20.66	55.3	20.87	19.35
Dhcr7	3_Strict_Shared_Down	1095.53	692	851.66	266.08	332.31	384.49	269.78	246.07	477.74	307.49	228	282.25	288.85	851.66	269.78	288.85
Gm24201	3_Strict_Shared_Down	154.38	61.92	106.72	27.02	32.77	50.88	28.47	47.39	38.32	38.5	42.48	25.69	40.91	106.72	32.77	38.5
Mvk	3_Strict_Shared_Down	473.87	201.52	197.64	63.18	94.11	134.03	124.29	83.7	145.67	73.41	83.12	90.19	116.44	201.52	94.11	90.19
5330406M23Rik	3_Strict_Shared_Down	63.98	112.04	105.22	54.59	45.07	46.25	52.91	43.39	33.35	45.21	32.86	41.33	21.34	105.22	46.25	33.35
Pdzk1ip1	3_Strict_Shared_Down	49.25	29.4	42.77	10.12	24.71	9.46	11.31	13.66	19	15.36	8.57	10.63	13.58	42.77	11.31	13.58
Snord94	3_Strict_Shared_Down	12276	4139.27	4705.15	2918.33	2658.01	3601.48	2219.16	1827.74	2139.06	2809.02	2797.62	2371.62	2268.95	4705.15	2658.01	2371.62
Snord16a	3_Strict_Shared_Down	1902.2	859.01	964.42	464.67	498.4	682.93	338.41	458.19	427.04	518.34	407.22	322.39	471.53	964.42	464.67	427.04
Dpy19l3	3_Strict_Shared_Down	873.45	420.25	224.89	218.98	182.58	179.25	144.66	121.04	176.59	117.83	222.65	216.67	127.48	420.25	179.25	176.59
Gm43410	3_Strict_Shared_Down	97.67	406.69	291.61	109.15	36.06	60.36	81.11	59.16	58.36	119.44	84.08	114.8	81.25	291.61	60.36	84.08
Meg3	3_Strict_Shared_Down	10.3	23.05	17.85	9.62	7.77	7.39	5.38	6.51	4.46	6.61	6.41	6.16	7.23	17.85	7.39	6.41
Slco1a4	3_Strict_Shared_Down	1322.71	1774.7	3065.45	871.4	884.62	343.41	995.68	546.06	758.56	746.84	591.61	618.32	770.22	1774.7	871.4	746.84
Sstr2	3_Strict_Shared_Down	6.31	22.03	15.13	2.42	8.08	8.33	2.11	6.16	4.63	7.86	5.09	5.35	5.16	15.13	6.16	5.16
9430037G07Rik	3_Strict_Shared_Down	113.5	412.3	558.65	235.87	137.96	74.16	123.6	169.64	113.01	119.05	114.62	147.21	115.78	412.3	137.96	115.78
Slco2a1	3_Strict_Shared_Down	364.89	641.41	592.22	293.92	258.31	139.83	182.06	261.63	147.29	213.6	178.52	158.4	195.84	592.22	258.31	178.52
Gm36749	3_Strict_Shared_Down	144.49	267.1	251.24	136.3	74.09	79.63	78.64	104.23	53.08	102.7	77.64	81.04	57.77	251.24	79.63	77.64
Gm24523	3_Strict_Shared_Down	140.5	62.53	82.68	43.75	18.62	64.07	21.77	15.54	32.05	37.72	29.83	21.84	30.72	82.68	21.77	30.72
Gm37195	3_Strict_Shared_Down	16.85	20.71	15.13	8.08	6.76	4.7	6.17	4.73	4.17	5.4	6.12	11.02	2.76	16.85	6.17	5.4
Insig1	3_Strict_Shared_Down	9848.48	5841.44	5084.62	2193.98	2090.17	3623.02	2965.72	1971.04	3433.19	2335.92	2464.69	1309.61	1639.39	5841.44	2193.98	2335.92
Hmgcr	3_Strict_Shared_Down	2403.71	1829.38	1931.75	1000.95	872.29	937.46	778.26	717.61	791.81	838.7	484.12	567.75	628.48	1931.75	872.29	628.48
Acmsd	3_Strict_Shared_Down	305.26	734.87	461.42	255.45	190.7	190.47	105.28	151.58	180.52	246.23	106.58	161.79	98.75	461.42	190.47	161.79
Gm22620	3_Strict_Shared_Down	267.38	70.13	75.05	50.01	20.94	63.24	27.04	13.21	41.45	48.5	40.8	31.33	46.46	75.05	27.04	41.45
Pmvk	3_Strict_Shared_Down	842.95	584.12	711.11	134.26	191.57	153.04	193.65	155.21	257.16	249.3	234.92	192.05	168.28	711.11	155.21	234.92
Gm32342	3_Strict_Shared_Down	87.33	102.43	93.68	26.37	18.93	17.06	35.86	33.26	33.82	39.21	25.02	24.95	22.75	93.68	26.37	25.02
Snora44	3_Strict_Shared_Down	620.27	228.9	279.75	135.38	153.94	164.05	107.55	114.1	123.7	146.27	106.1	81.72	106.3	279.75	135.38	106.3
Snora15	3_Strict_Shared_Down	833.7	270.76	313.76	195.82	93.17	204.19	133.94	99.41	110.03	153.6	161.01	132.04	146.3	313.76	133.94	146.3
Gm36264	3_Strict_Shared_Down	177.92	122.47	237.18	51.58	60.19	88.24	51.43	88.24	41.17	56.63	51.9	81.02	40.16	177.92	60.19	51.9
Lss	3_Strict_Shared_Down	1297.39	873.06	1367.79	363.1	336.55	417.9	521.62	246.77	543.36	383.43	298.33	223.19	306.52	1297.39	363.1	306.52
Gm25189	3_Strict_Shared_Down	112.59	37.2	57.34	33.4	11.5	35.1	17.84	17.16	21.9	27.51	17.8	10.39	18.66	57.34	17.84	18.66
Gm57434	3_Strict_Shared_Down	37.37	50.8	75.37	21.33	25.88	20.26	17.41	16.71	14.44	25.9	10.73	23.52	9.21	50.8	20.26	14.44
Gm63658	3_Strict_Shared_Down	13.48	69.05	34.39	28.28	6.76	10.98	7.05	14.99	9.03	18.22	7.65	11.02	11.02	34.39	10.98	11.02
Fmn1	3_Strict_Shared_Down	683.34	154.57	182.07	46.26	93.16	91.85	66.58	66.93	80.48	71.59	148.11	75.29	79.44	182.07	66.93	79.44
Gm33862	3_Strict_Shared_Down	26.93	69.84	74.26	26.29	18.03	17.24	19.41	27.61	18.06	19.57	14.52	15.62	13.77	69.84	19.41	15.62
Gm36180	3_Strict_Shared_Down	34.7	40.1	38.91	16.29	6.79	10.06	17.85	9.86	12.55	21.87	7.71	4.5	3.16	38.91	10.06	7.71
Gm37626	3_Strict_Shared_Down	13.49	11.51	24.08	8.07	2.25	3.14	2.64	2.37	6.25	2.7	5.36	5.51	2.07	13.49	2.64	5.36
Cyp26a1	3_Strict_Shared_Down	187.58	198.75	192.94	58.37	58.31	33.53	67.61	56.4	56.69	60.43	43.33	32.92	53.42	192.94	58.31	53.42
Tm7sf2	3_Strict_Shared_Down	2966.15	2935.74	2778.7	608.41	787.44	588.36	694.52	705.28	605.22	770.39	700.15	756.67	630.1	2935.74	694.52	700.15
Ccdc168	3_Strict_Shared_Down	20.24	64.42	73.65	10.08	13.52	4.71	5.28	21.3	11.11	14.85	21.44	7.34	4.83	64.42	10.08	11.11
Btbd19	3_Strict_Shared_Down	10.62	124.59	331.06	53.43	35.57	38.12	53.97	38.01	18.37	43.96	18.18	54.88	35.94	124.59	38.12	35.94
Mvd	3_Strict_Shared_Down	273.3	106.17	93.6	54.43	27.11	39.28	32.73	41.91	33.28	30.43	28.99	25.37	37.25	106.17	39.28	30.43
Rdh11	3_Strict_Shared_Down	2144.75	1422.98	1522.51	246.31	433.63	282.65	294.26	336.17	346.86	322.18	422.26	343.71	285.13	1522.51	294.26	343.71
Msmo1	3_Strict_Shared_Down	5272.03	2207.81	2328.19	517.77	605.69	746.89	779.15	509.36	930.92	835.72	434.17	591.53	516.93	2328.19	605.69	591.53
Aldoc	3_Strict_Shared_Down	247.32	192.13	244.45	17.9	28.49	69.57	61.1	41.79	79.24	46.73	49.96	30.93	23.11	244.45	41.79	46.73
Gm25587	3_Strict_Shared_Down	56.27	22.02	86.7	16.7	18.4	20.27	10.71	7.02	9.59	12.74	8.51	6.61	16.01	56.27	16.7	9.59
Fabp5	3_Strict_Shared_Down	319.12	1136.76	396.94	110.48	115.51	134.57	67.45	144.1	109.61	111.47	115.95	112.86	129.44	396.94	115.51	112.86
Gm14308	3_Strict_Shared_Down	91.8	30.65	26.4	0	6.34	16.55	11.51	2.78	4.91	0	13.41	22.8	4.84	30.65	6.34	4.91
Pclo	3_Strict_Shared_Down	13.13	27.51	19.93	3.99	8.91	3.11	2.29	3.64	0	3.68	3.58	5.98	4.29	19.93	3.64	3.68
Nsdhl	3_Strict_Shared_Down	1239.02	859.63	926.84	114.88	177.5	150.06	130.99	109.08	194.91	144.65	135.41	135.53	146.22	926.84	130.99	144.65
Nr4a1	3_Strict_Shared_Down	47.3	188.25	33.22	19.96	20.57	18.65	18.32	8.33	13.84	22.19	7.03	7.74	11.38	47.3	18.65	11.38
Fdps	3_Strict_Shared_Down	8269.41	4893.97	5261.97	494.9	650.55	741.36	592.71	506.37	997.28	678.62	735.82	428.2	411.54	5261.97	592.71	678.62
Cyp51	3_Strict_Shared_Down	4169.73	3740.87	3571.45	436.96	432.04	427.87	350.66	335.85	464.47	438.51	493.36	304.09	292.68	3740.87	427.87	438.51
Ppp1r3g	3_Strict_Shared_Down	179.08	481.27	245.41	18.02	11.3	46.59	58.36	17.19	72.48	20.98	19.94	11.05	18.65	245.41	18.02	19.94
Pcsk9	3_Strict_Shared_Down	1236.96	552.35	525.62	80.77	58.59	89.39	73.98	38.65	122.96	57.37	45.13	33.96	24.8	552.35	73.98	45.13
Idi1	3_Strict_Shared_Down	5875.56	4593.87	3829.95	226.91	426.97	270.64	337.21	290.65	428.47	330.41	312.9	351.1	278.92	4593.87	290.65	330.41
Ttyh1	3_Strict_Shared_Down	34.67	75.34	76.76	1.5	6.7	4.66	5.23	6.48	4.13	4.01	5.12	1.36	8.16	75.34	5.23	4.13
Sqle	3_Strict_Shared_Down	1059.48	1125.03	838.66	7.83	9.48	11.8	9.09	4.27	9.59	6	6.35	10.36	10.53	1059.48	9.09	9.59
Gm17055	4_Fat_Specific_Down	4.96	17.36	18.07	2.97	2.21	1.15	1	1.55	14.8	2.98	48.05	0	14.07	17.36	1.55	14.07
Ighm	4_Fat_Specific_Down	181.92	203.34	168.41	67.48	105.77	126.48	80.06	64.71	90.3	239.59	154.81	98.06	131.26	181.92	80.06	131.26
Ugt1a9	4_Fat_Specific_Down	1064.22	1048.21	1389.93	390.13	552.1	320.6	710.66	801.44	723.2	833.35	820.1	776.98	1275.1	1064.22	552.1	820.1
Gm43807	4_Fat_Specific_Down	13.46	15.35	10.31	4.05	2.25	0.78	3.53	7.89	6.25	8.1	7.64	14.7	10.32	13.46	3.53	8.1
Snhg11	4_Fat_Specific_Down	87.94	96.65	117.9	30.59	46.14	44.88	57.01	39.19	70.65	81.11	78.73	72.81	62.57	96.65	44.88	72.81
Gm44861	4_Fat_Specific_Down	16.81	14.59	13.06	4.05	4.51	3.13	4.42	7.1	6.95	15.51	9.15	9.2	9.62	14.59	4.42	9.2
Gm37677	4_Fat_Specific_Down	33.73	52.15	47.49	14.12	24.78	21.18	26.4	21.3	33.34	32.4	23.73	42.19	33.09	47.49	21.3	33.09
4833422C13Rik	4_Fat_Specific_Down	82.32	58.34	66.93	23.88	40.59	31.9	26.89	27.14	43.02	65.24	47.74	39.97	25.55	66.93	27.14	43.02
Lmntd2	4_Fat_Specific_Down	6.69	22.92	11.62	4.06	4.52	4.72	7.08	5.54	9.76	8.72	13.03	9.21	8.94	11.62	4.72	9.21
Gm36435	4_Fat_Specific_Down	17.22	20.86	17.8	5.09	3.53	7.97	3.21	7.9	10.47	17.27	13.61	10.48	9.35	17.8	5.09	10.48
Gm37588	4_Fat_Specific_Down	10.11	29.16	30.95	16.17	11.27	10.98	7.93	12.62	13.2	14.85	19.11	19.28	17.22	29.16	11.27	17.22
Gm24313	4_Fat_Specific_Down	43.45	43.45	37.87	14.59	11.63	31.62	16.57	8.55	25.4	26.94	34.53	18.99	19.63	43.45	14.59	25.4
ENSMUSG00000137237	4_Fat_Specific_Down	10.13	14.17	14.7	3.54	6.51	4.77	3.09	8.15	9.71	9.5	6.25	5.61	9.41	14.17	4.77	9.41
Hmgcs1	4_Fat_Specific_Down	8006.93	3190.34	3316.19	1484.05	1698.49	1928.76	2027.91	1829.8	2285.89	2123.38	3874.87	2258.84	2336.67	3316.19	1829.8	2285.89
Gm22270	4_Fat_Specific_Down	408.12	104.47	95.08	93.76	34.92	127.34	52.26	24.08	90.8	117.88	113.05	70.28	105.9	104.47	52.26	105.9
Gm38230	4_Fat_Specific_Down	10.09	16.13	22	0	0	10.19	6.19	3.95	5.56	8.77	9.16	8.29	8.94	16.13	3.95	8.77
Gm24871	4_Fat_Specific_Down	1990.74	704.05	580.84	497.67	150.94	583.96	380.26	187.24	533.49	565.82	476.36	322.08	658.2	704.05	380.26	533.49
Srgap3	4_Fat_Specific_Down	39.84	11.13	70.72	2.99	8.35	3.25	22.29	7.09	16.18	15.63	19.6	12.04	17.82	39.84	7.09	16.18
Gm14421	5_Fructose_Specific_Down	47.14	138.14	154.04	84.93	114.93	72.89	101.44	96.24	55.58	66.8	45.08	61.55	67.46	138.14	96.24	61.55
Ang	5_Fructose_Specific_Down	1555.94	1926.75	1712.31	2003.41	1475.83	942.91	1043.07	1086.7	739.13	849.16	621.16	1191.28	897.23	1712.31	1086.7	849.16
Gm53019	5_Fructose_Specific_Down	598.47	665.03	1194.75	647.64	864.27	714.74	636.45	528.63	464.73	390.66	309.46	598.19	240.7	665.03	647.64	390.66
Gm43813	5_Fructose_Specific_Down	23.33	23.93	30.3	25.92	12.4	21.06	19.38	20.26	11.47	16.1	11.23	16.83	9.48	23.93	20.26	11.47
Kcnk5	5_Fructose_Specific_Down	1635.78	1797.16	832.08	1049.31	1067.19	911.56	1008.57	1303.26	926.43	1233.69	415.41	355.65	471.89	1635.78	1049.31	471.89
Coq10b	5_Fructose_Specific_Down	1866.2	1717.23	1632.11	1556.11	1393.9	1413.97	1429.99	944.13	1353.09	914.49	385.56	700.85	697.28	1717.23	1413.97	700.85
Gm38034	5_Fructose_Specific_Down	87.55	153.48	134.79	93	119.43	90.92	124.34	100.97	49.33	103.24	39.74	63.38	41.99	134.79	100.97	49.33
Chlsn	5_Fructose_Specific_Down	66.89	109.46	52.65	78.32	39.56	86.31	41.06	51.06	48.11	18.04	18.61	54.39	38.78	66.89	51.06	38.78
Kif24	5_Fructose_Specific_Down	38.1	59.32	55.44	46.82	40.96	46.91	38.93	28.03	20.24	19.24	31.98	29.96	23.96	55.44	40.96	23.96
Noct	5_Fructose_Specific_Down	1809.53	2231.76	2041.68	1753.76	1369.1	918.03	1725.35	1655.04	1067.96	1131.77	578.62	1172.71	734.44	2041.68	1655.04	1067.96
Ncor2	5_Fructose_Specific_Down	157.65	164.9	343.92	161.86	104.48	159.78	204.43	167.77	103.85	87.41	55.18	102.63	167.7	164.9	161.86	102.63
Mup1	5_Fructose_Specific_Down	43292.4	35890.5	16509.4	26099.2	24138.2	41469.4	13982.2	17153.2	16401.6	16817.6	13220.8	18249.7	7351.16	35890.5	24138.2	16401.6
Wdfy4	5_Fructose_Specific_Down	230.28	180.4	148.26	123.83	133.18	131.13	160.49	142.19	101.78	69.89	62.83	35.72	144.55	180.4	133.18	69.89
Pim3	5_Fructose_Specific_Down	1866.11	3426.06	2520.95	2590.66	1876.61	1184.2	1489.8	1904.4	1036.42	2327.65	791.3	816.6	871.4	2520.95	1876.61	871.4
Maff	5_Fructose_Specific_Down	217.38	192.91	139.87	147.33	85.96	114.15	122.33	103.47	120.13	73.38	46.82	78.18	73.55	192.91	114.15	73.55
Rnase4	5_Fructose_Specific_Down	21090.3	17051.9	16320.3	17457.2	12342	9479.92	9637.33	8928.87	7638.88	7090.62	6431.4	10365.6	7806.48	17051.9	9637.33	7638.88
Bmp10	5_Fructose_Specific_Down	141.6	93.58	89.45	82.76	58.58	54.9	71.31	59.16	59.74	47.25	41.32	45.88	30.32	93.58	59.16	45.88
Mup12	5_Fructose_Specific_Down	14805	10770.4	5690.67	8234.65	7163.6	11843.6	4323.53	5631.19	5669.71	5281.17	3383.11	5672.2	2474.45	10770.4	7163.6	5281.17
Cyp1a2	5_Fructose_Specific_Down	6239.2	4824.13	5890.63	3411.07	3489.18	3709.59	3545.1	3923.25	3654.8	1972.57	1598.82	2760.94	2178.15	5890.63	3545.1	2178.15
Arl4d	5_Fructose_Specific_Down	1052.69	621.84	547.11	404.98	588.22	371.32	538.88	551.38	425.21	492.4	251.1	211.48	202.88	621.84	538.88	251.1
Slc38a2	5_Fructose_Specific_Down	5034.41	6682.29	6281.3	5358.68	3657.1	2264.7	2806.76	4208.17	2161.09	4801.44	1844.96	1873.28	2037.31	6281.3	3657.1	2037.31
Cadm4	5_Fructose_Specific_Down	104.4	173.42	171.25	115.22	101.41	119.93	67.01	70.2	67.39	67.48	74.9	59.7	57.14	171.25	101.41	67.39
Slc25a25	5_Fructose_Specific_Down	4848.3	7063.32	9002.13	4971.54	4193.57	4443.67	4642.58	4009.32	2012.56	4320.49	2889.36	2821.93	2725.24	7063.32	4443.67	2821.93
Gm32064	5_Fructose_Specific_Down	39.55	27.32	27.72	33.97	13.24	20.04	19.53	15.29	18.37	9.41	11.9	12.35	11.52	27.72	19.53	11.9
Creld2	5_Fructose_Specific_Down	662.53	1801.05	517.55	1514.73	570.2	485.69	507.99	691.79	462.73	398.64	482.34	332.87	392.68	662.53	570.2	398.64
Egfr	5_Fructose_Specific_Down	15032.4	22900.7	30238.6	17694.6	15686	16439.8	9590.57	14546	9977.75	8051.57	7159.74	14853.3	6811.91	22900.7	15686	8051.57
Il12rb1	5_Fructose_Specific_Down	26.14	19.11	30.81	20.5	15.3	15.72	11.11	14.89	8.54	10.6	11.87	13.64	7.8	26.14	15.3	10.6
Dact1	5_Fructose_Specific_Down	81.66	112.15	164.49	75.44	104.81	56.99	59.2	76.71	51.13	51.19	44.18	58.7	46.63	112.15	75.44	51.13
Bmf	5_Fructose_Specific_Down	510.48	418.54	317.81	331.7	286.3	362.04	232.74	168.17	264.16	156.49	140.66	110.25	147.22	418.54	286.3	147.22
Gm66826	5_Fructose_Specific_Down	57.15	141.28	75.59	56.73	67.61	64.22	67.18	58.37	47.25	39.12	38.14	29.44	33	75.59	64.22	38.14
9930024M15Rik	5_Fructose_Specific_Down	23.58	32.23	26.83	16.16	22.53	14.11	11.46	16.57	8.34	14.85	6.88	15.61	8.26	26.83	16.16	8.34
Cyp7b1	5_Fructose_Specific_Down	7957.84	8398.79	6472.28	4051.04	4148.63	8395.92	2715.78	3648.29	3272.8	2098.55	3132.04	3493.75	1740.49	7957.84	4051.04	3132.04
Gm72879	5_Fructose_Specific_Down	380.79	838.55	377.67	1086.68	392.08	290.11	317.15	377.85	229.94	276.03	84.13	212.96	153.61	380.79	377.85	212.96
Mup7	5_Fructose_Specific_Down	651979	650677	346351	268366	334495	663665	159324	266210	195042	241120	171514	283290	85394.2	650677	268366	195042
Prss8	5_Fructose_Specific_Down	97.63	52.95	69.45	22.25	13.52	89.34	44.99	18.14	52.8	18.22	19.1	14.7	22.71	69.45	22.25	19.1
Gm62524	5_Fructose_Specific_Down	26.72	67.68	33.59	16.35	22.55	28.11	16.95	26.82	12.51	18.85	14.41	19.42	14.36	33.59	22.55	14.41
Gm68195	5_Fructose_Specific_Down	26.86	29.96	20.6	16.23	6.76	14.09	8.85	24.45	6.95	12.81	4.57	11.05	8.93	26.86	14.09	8.93
Gm45410	5_Fructose_Specific_Down	30.24	29.18	17.17	24.33	20.29	10.96	10.62	13.41	6.95	12.14	9.91	6.44	6.18	29.18	13.41	6.95
Gm63893	5_Fructose_Specific_Down	16.8	11.52	20.61	20.28	15.78	3.91	11.5	12.62	3.47	7.42	3.81	9.2	4.12	16.8	12.62	4.12
Gm56821	5_Fructose_Specific_Down	160.2	270.33	235.4	129.99	131.33	172.24	95.52	66.11	98.64	63.12	51.63	118.3	50.23	235.4	129.99	63.12
Gm37962	5_Fructose_Specific_Down	3.37	18.42	13.75	14.15	2.25	10.19	11.47	10.25	5.56	4.72	4.59	5.51	2.75	13.75	10.25	4.72
Gm67885	5_Fructose_Specific_Down	16.73	19.22	19.89	14.27	13.53	12.5	2.67	5.52	4.86	10.1	5.31	9.24	2.74	19.22	12.5	5.31
Gm47814	5_Fructose_Specific_Down	32.64	39.6	32.7	10.99	29.33	19.84	23.65	13.41	11.06	12.22	14.94	12.54	8.71	32.7	19.84	12.22
Gm74637	5_Fructose_Specific_Down	172.08	36.52	36.53	44.44	36.42	47.58	43.01	40.48	35.01	43.42	14.46	21.03	15.65	36.53	43.01	21.03
Snora62	5_Fructose_Specific_Down	53.14	16.7	15.73	14.62	13.86	15.68	12.39	7.01	11.55	10.75	7.78	3.79	7.28	16.7	13.86	7.78
Gm43598	5_Fructose_Specific_Down	16.84	16.88	14.44	2.02	11.27	7.06	6.17	12.62	5.56	8.77	6.88	1.84	2.75	16.84	7.06	5.56
Gm30107	5_Fructose_Specific_Down	55.13	179.96	78.32	66.79	64.21	61.53	39.66	42.66	36.72	23.01	24.9	71.1	19.29	78.32	61.53	24.9
Gm39583	5_Fructose_Specific_Down	12.13	45.43	71.22	61.44	50.28	32.2	9.32	33.01	17.22	18.1	5.53	24.37	8.04	45.43	33.01	17.22
Gapdhrt	5_Fructose_Specific_Down	158.18	172.69	205.57	78.9	85.64	188.85	60.9	89.92	63.92	81.63	44.3	59.73	39.91	172.69	85.64	59.73
Gm29438	5_Fructose_Specific_Down	37.06	52.94	81.85	20.21	36.05	35.28	32.61	29.19	18.76	29.69	11.47	16.53	19.28	52.94	32.61	18.76
BC021767	5_Fructose_Specific_Down	81.54	134.69	83.18	42.22	63.42	98.76	31.1	48.31	41.2	24.98	18.62	50.17	25.04	83.18	48.31	25.04
Pfkfb3	5_Fructose_Specific_Down	368.55	421.71	713.86	296.12	359.41	337	335.34	475.31	139.16	172.55	108.73	209.4	164.61	421.71	337	164.61
Fst	5_Fructose_Specific_Down	20.51	101.7	66.35	51.98	8.01	53.58	14.98	30.93	20.09	13.97	26.55	19.4	21.29	66.35	30.93	20.09
Slc15a2	5_Fructose_Specific_Down	235.09	102.43	291.54	107.63	52.7	31.66	111.51	184.33	62.27	87.39	39.87	78.22	57.12	235.09	107.63	62.27
Ltbp3	5_Fructose_Specific_Down	129.19	34.77	42.54	31.82	34.67	15.24	24.55	21.93	25	15.25	18.44	12.51	12.52	42.54	24.55	15.25
Gm70376	5_Fructose_Specific_Down	44.05	15.81	18.55	11.56	11.85	5.78	11.7	14.48	4.34	13.52	1.65	8.59	8.23	18.55	11.7	8.23
Dnase1l2	5_Fructose_Specific_Down	15.86	19.06	19.96	11.41	9.46	11.22	10.64	10.35	6.76	3.07	8.32	4.99	6.04	19.06	10.64	6.04
Gm36789	5_Fructose_Specific_Down	9.01	23.45	15.95	16.78	0	13.62	6.3	7.17	5.05	6.09	4.09	6.56	4.41	15.95	7.17	5.05
Mm2pr	5_Fructose_Specific_Down	30.09	22.93	23.93	19.3	11.22	13.52	11.45	10.99	6.92	8.05	4.64	11.1	6.54	23.93	11.45	6.92
Gm17530	5_Fructose_Specific_Down	12.56	10.88	26.43	9.66	19.14	10.29	7.59	7.44	5.89	6.34	6.42	5.24	1.29	12.56	9.66	5.89
Selenbp2	5_Fructose_Specific_Down	6846.31	14284.2	9942.81	2203.73	5053.63	13452.6	2005.14	5881.7	4449.66	2352.41	2515.62	4327.22	1949	9942.81	5053.63	2515.62
Gm45872	5_Fructose_Specific_Down	10.09	19.19	17.19	4.05	11.27	8.62	14.12	3.16	6.25	7.42	3.82	4.6	1.38	17.19	8.62	4.6
Gm59577	5_Fructose_Specific_Down	13.38	10.77	13.71	4.08	6.76	5.47	6.23	10.25	0.69	2.69	6.07	3.7	4.79	13.38	6.23	3.7
C8b	5_Fructose_Specific_Down	7895.41	10189.6	7884.94	4825.7	4459.2	6407.7	3007.98	3405.22	2338.77	2548.17	2730.75	2843.05	1795.87	7895.41	4459.2	2548.17
Gm11737	5_Fructose_Specific_Down	3.33	12.31	10.28	6.15	11.28	7.8	5.37	5.52	3.47	3.36	1.51	1.85	3.41	10.28	6.15	3.36
Sik1	5_Fructose_Specific_Down	378.58	672.53	568.6	458.98	168.51	319.61	341.31	118.91	193.08	244.77	90.32	89.66	141.31	568.6	319.61	141.31
Epop	5_Fructose_Specific_Down	30.31	58.32	48.83	24.25	31.55	25.09	15.87	17.35	15.28	22.27	9.94	4.59	13.08	48.83	24.25	13.08
Wasf1	5_Fructose_Specific_Down	13.48	4.6	12.38	2.02	2.25	3.14	6.17	3.16	2.08	2.02	2.29	2.75	3.44	12.38	3.14	2.29
Hsd3b5	5_Fructose_Specific_Down	4801.29	3136.4	2800.68	1600.87	3326.38	4875.11	1967.09	1761.42	1115.1	491.78	908.63	1626.92	490.52	3136.4	1967.09	908.63
Gm17971	5_Fructose_Specific_Down	46.94	49.18	48.05	28.46	24.8	41.46	40.81	21.3	18.07	12.13	5.33	14.75	10.98	48.05	28.46	12.13
Gm71818	5_Fructose_Specific_Down	15.22	22.65	21.81	11.17	2.05	7.52	14.15	6.66	1.9	5.52	2.07	9.27	7.08	21.81	7.52	5.52
Serpina9	5_Fructose_Specific_Down	6.74	27.62	41.28	20.19	11.27	20.39	7.05	11.04	4.17	4.05	3.06	19.27	2.76	27.62	11.27	4.05
AA986860	5_Fructose_Specific_Down	48.39	121.82	44.43	32.06	21.57	7.51	16.24	50.66	16.43	28.95	5.86	11.79	23.91	48.39	21.57	16.43
Rskr	5_Fructose_Specific_Down	8.21	28.52	30.71	7.07	11.52	21.13	6	9.5	6.12	7.56	9.98	2.94	3.54	28.52	9.5	6.12
E030018B13Rik	5_Fructose_Specific_Down	40.3	164.37	115.39	83.18	49.59	29.75	15.05	31.55	13.2	72.14	10.67	17.49	4.12	115.39	31.55	13.2
Gm62510	5_Fructose_Specific_Down	177.16	13.84	6.17	34.7	54.12	19.53	26.73	20.51	13.2	7.41	12.9	26.81	5.47	13.84	26.73	12.9
mt-Ti	5_Fructose_Specific_Down	10.22	16.24	7.75	0	5.98	3.29	2.73	4.66	0.73	4.28	3.09	2.45	0.77	10.22	3.29	2.45
Igha	5_Fructose_Specific_Down	16.89	17.76	51.96	6.12	6.8	20.66	21.54	3.97	7.69	6.1	8.43	2.78	3.45	17.76	6.8	6.1
Noxred1	5_Fructose_Specific_Down	6.16	13.96	15.84	16.68	4.13	4.31	8.16	4.33	3.82	3.09	0	4.21	0.63	13.96	4.33	3.09
Gm53027	5_Fructose_Specific_Down	3.31	12.15	12.29	4.18	6.89	3.89	3.58	7.03	0.69	2.01	0.77	4.71	1.34	12.15	4.18	1.34
Ugt2b38	5_Fructose_Specific_Down	770.95	891.77	475.16	177.96	117.18	637.18	56.46	124.63	148.67	69.5	146.69	164.45	60.57	770.95	124.63	146.69
Gm38357	5_Fructose_Specific_Down	151.59	218.68	166.45	94.98	74.36	79.96	120.75	87.56	25.7	39.81	10.7	34.89	35.12	166.45	87.56	34.89
ENSMUSG00000128022	5_Fructose_Specific_Down	19.48	145.44	49.05	169.92	21.11	6.56	9.86	27.65	9.79	14.67	10.87	14.98	6.82	49.05	21.11	10.87
Msantd1	5_Fructose_Specific_Down	1.94	17.77	14.74	21.36	26.83	7.33	1.01	3.63	5.01	1.55	0.44	1.59	1.19	14.74	7.33	1.55
Gm63898	5_Fructose_Specific_Down	13.36	34.58	22.6	14.28	6.76	5.46	12.47	10.25	3.47	2.69	0	2.77	7.52	22.6	10.25	2.77
Ccdc63	5_Fructose_Specific_Down	19.36	0.76	22.82	2	3.34	8.27	6.71	5.81	1.72	1	1.35	2.27	1.36	19.36	5.81	1.36
Gm67990	5_Fructose_Specific_Down	18.89	21.51	27.2	7.98	34.2	6.83	5.59	3.11	4.43	3.03	0	4.15	1.36	21.51	6.83	3.03
9130230L23Rik	5_Fructose_Specific_Down	7.81	11.3	25.74	5.79	1.48	3.47	8.91	7.03	2.68	1.96	3.33	0.33	0.45	11.3	5.79	1.96
A830082N09Rik	5_Fructose_Specific_Down	20.16	614.05	27.56	20.5	9.43	19.22	16.3	607.31	16.61	17.35	22.88	15.35	16.07	27.56	19.22	16.61
Tnfrsf25	5_Fructose_Specific_Down	22.02	12.15	7.44	1.29	2.88	0	7.19	2.74	1.7	1.1	0	0.59	0.44	12.15	2.74	0.59
Ywhaq-ps3	5_Fructose_Specific_Down	56.99	19.99	28.15	0	0	20.34	7.11	15.78	0	4.72	0	0	0	28.15	7.11	0
Moxd1	5_Fructose_Specific_Down	26.96	527.02	5.5	10.1	0	894.57	0.88	2.37	2.78	0.67	8.41	0.92	0	26.96	2.37	0.92
Gm60198	5_Fructose_Specific_Down	0	35.29	25.43	0	9.01	14.1	5.29	0	0	0	0	0	0	25.43	5.29	0
Sult1e1	6_Fat_Specific_Up	3.36	13.05	12.37	52.68	13.52	500.48	55.69	27.61	290.43	26.98	34.33	50.59	33	12.37	52.68	34.33
Gm34471	6_Fat_Specific_Up	0	0.51	4.53	18.63	27.05	13.64	8.12	3.09	9.15	5.78	9.72	3.88	10.22	0.51	13.64	9.15
Saa2	6_Fat_Specific_Up	283.57	143.67	173.24	20755.2	333.94	1279.88	667.25	958.6	986.05	1071.91	828.71	1065.34	1238.93	173.24	958.6	1065.34
Saa1	6_Fat_Specific_Up	668.61	416.21	393.77	36586.8	875.39	3332.11	1762.66	1958.69	2040.97	2728.73	2178.65	2618.17	2758.51	416.21	1958.69	2618.17
S100a8	6_Fat_Specific_Up	3.33	6.16	5.48	126.96	13.54	27.28	15.22	5.52	15.99	18.81	28.79	19.42	25.95	5.48	15.22	19.42
Rnf32	6_Fat_Specific_Up	0	3.12	3.05	19.95	10.87	9.4	22.99	5.94	19.57	5.1	3.13	10.21	5.85	3.05	10.87	5.85
Cercam	6_Fat_Specific_Up	0	1.87	3.91	14.77	7.32	18.12	7.87	17.84	6.21	8.22	6.16	5.22	9.51	1.87	14.77	6.21
Slfn4	6_Fat_Specific_Up	6.85	3.66	1.31	52.17	4.02	19.26	10.46	5.62	11.14	4.81	8.04	8.99	6.47	3.66	10.46	8.04
Obp2a	6_Fat_Specific_Up	36.86	15.37	9.61	87.49	45.09	150.15	23.98	81.24	38.22	52.56	52.46	53.5	16.45	15.37	81.24	52.46
Gm50433	6_Fat_Specific_Up	2.77	3	8.67	18.26	30.85	14.64	15.39	9.61	6.21	12.16	12.9	21.33	9.43	3	15.39	12.16
Ppbp	6_Fat_Specific_Up	10.08	14.59	11.68	249.42	22.54	45.41	21.24	13.41	24.32	22.93	34.31	26.69	24.05	11.68	22.54	24.32
F13a1	6_Fat_Specific_Up	16.16	6.51	7.33	77.91	6.23	39.73	18.62	21.21	10.88	13.34	24.62	12.25	27.88	7.33	21.21	13.34
Dkk4	6_Fat_Specific_Up	23.54	11.52	4.81	56.71	49.58	104.18	35.35	14.2	49.33	21.58	18.31	21.15	9.63	11.52	49.58	21.15
B430219N15Rik	6_Fat_Specific_Up	16.74	18.78	19.26	79.02	62.52	75.89	80.45	24.47	56.23	50.4	21.48	36.39	23.47	18.78	75.89	36.39
6330562C20Rik	6_Fat_Specific_Up	8.17	3.04	5.99	14.86	18.24	12.36	17.35	9.49	10.11	9.66	7.52	8.22	13.37	5.99	14.86	9.66
Cplane1	6_Fat_Specific_Up	69.5	135.37	178.24	481.25	211	536.36	447.52	258.24	278.47	236.09	285.18	253.8	196.99	135.37	447.52	253.8
Pde5a	6_Fat_Specific_Up	68.03	41.29	57.03	288.53	102.76	270.25	71.51	98.46	101.93	101.67	87.93	110.01	112.46	57.03	102.76	101.93
Slc7a11	6_Fat_Specific_Up	3.63	6.25	4.89	33.14	8.42	27.88	10.61	12.87	10.4	9.35	5.29	12.77	8.96	4.89	12.87	9.35
Prok1	6_Fat_Specific_Up	33.7	51.4	60.53	224.21	137.46	199.95	141.84	79.67	100.04	101.24	47.42	112.89	95.75	51.4	141.84	100.04
Kif22	6_Fat_Specific_Up	10.23	8.6	3.76	25.76	39.32	27.59	13.29	12.06	5.7	9.42	6.27	10.57	19.77	8.6	25.76	9.42
Sorl1	6_Fat_Specific_Up	85.23	49.45	46.77	124.78	66.74	141.78	196.92	178.77	109.54	85.28	85.38	85.5	108.72	49.45	141.78	85.5
Gm56656	6_Fat_Specific_Up	0	15.35	10.99	24.31	24.78	30.53	22.98	23.66	19.45	17.53	17.54	16.55	18.55	10.99	24.31	17.54
Gm65496	6_Fat_Specific_Up	23.53	15.36	12.37	28.38	47.33	50.9	44.22	24.45	34.05	18.88	20.59	23	16.5	15.36	44.22	20.59
B3galt1	6_Fat_Specific_Up	309.08	322.98	600.4	1752.15	716.65	827.25	660.32	544.91	621.41	739.75	349.29	604.49	599.96	322.98	716.65	604.49
Nrep	6_Fat_Specific_Up	311.01	294.13	474.85	818.56	760.15	1160.01	1002.15	402.4	785.43	498.93	160.67	555.31	531.92	311.01	818.56	531.92
Serpina3n	6_Fat_Specific_Up	6199.23	6641.01	5972.69	25989.8	8250.02	9739.74	9536.71	9647.26	8967.44	9311.6	7913.26	8657.12	9078.94	6199.23	9647.26	8967.44
