# Supplementary material
Source: Research Square preprint supplement (doi:10.21203/rs.3.rs-9902298/v1)
Supplement: Supplementary file 3 [file da1385f6c2bd8d4f3f0f60ba.xlsx]

## Sheet: 70 Outlier-Flagged Genes
Outlier-Influenced Genes: HFD4052 (n=70 unique genes, 76 comparison-gene pairs)
OUTLIER CRITERIA: z-score (|HFD4052 - group mean| / group SD) >= 1.5 AND HFD4052 >= 3x trimmed mean (excluding HFD4052). Genes where removal of HFD4052 reverses the sign of log2FC are flagged. 76 comparison-gene pairs across 3 pairwise comparisons; 70 unique genes. 5 entered the nine-category classification; 65 did not pass DEG thresholds and are Unclassified. NOTE: The 65 unclassified genes are …
Gene	Category (9-type)	HFD4052 (counts)	HFD4019 (counts)	HFD4048 (counts)	HFD4049 (counts)	HFD4020 (counts)	HFD Mean (with 4052)	HFD Mean (without 4052)	z-score	Fold vs Trimmed Mean	CD Median	HFD Median	HFSD Median	log2FC HFD vs CD	Outlier Status
Saa1	6 Fat Specific Up	36586.8	875.4	3332.1	1762.7	1958.7	8903.1	1982.2	2	18.5	416.21	1958.7	2618.2	4.176	CLASSIFIED — entered 9-type framework; interpret with caution
Saa2	6 Fat Specific Up	20755.2	333.9	1279.9	667.2	958.6	4799	809.9	2	25.6	173.24	958.6	1065.3	4.586	CLASSIFIED — entered 9-type framework; interpret with caution
Lcn2	0b Fructose Suppressed	2074	106.1	296.8	164.3	259.2	580.1	206.6	1.99	10	16.07	259.2	311.7	4.787	CLASSIFIED — entered 9-type framework; interpret with caution
Gm72879	5 Fructose Specific Down	1086.7	392.1	290.1	317.1	377.9	492.8	344.3	1.98	3.2	380.79	377.9	213	-0.117	Within-717-DEG flag; category unaffected
Ppbp	6 Fat Specific Up	249.4	22.5	45.4	21.2	13.4	70.4	25.6	1.99	9.7	11.68	22.5	24.3	2.494	Within-717-DEG flag; category unaffected
ENSMUSG00000128022	5 Fructose Specific Down	169.9	21.1	6.6	9.9	27.6	47	16.3	1.98	10.4	49.05	21.1	10.9	-0.649	Within-717-DEG flag; category unaffected
S100a8	6 Fat Specific Up	127	13.5	27.3	15.2	5.5	37.7	15.4	1.98	8.2	5.48	15.2	19.4	2.8	CLASSIFIED — entered 9-type framework; interpret with caution
F13a1	6 Fat Specific Up	77.9	6.2	39.7	18.6	21.2	32.7	21.4	1.81	3.6	7.33	21.2	13.3	1.935	Within-717-DEG flag; category unaffected
Sult1e1	6 Fat Specific Up	52.7	13.5	500.5	55.7	27.6	130	149.3	0.42	0.4	12.37	52.7	34.3	3.707	CLASSIFIED — entered 9-type framework; interpret with caution
Slfn4	6 Fat Specific Up	52.2	4	19.3	10.5	5.6	18.3	9.8	1.91	5.3	3.66	10.5	8	2.624	Within-717-DEG flag; category unaffected
Ccr1	1 Strict Shared Up	38.4	4.5	12.5	6.2	5.5	13.4	7.2	1.95	5.3	0.77	6.2	11.8	3.697	Within-717-DEG flag; category unaffected
Slfn1	1 Strict Shared Up	30.3	2.2	14.9	11.5	7.9	13.4	9.1	1.79	3.3	0	11.5	11.5	3.348	Within-717-DEG flag; category unaffected
Noxred1	5 Fructose Specific Down	16.7	4.1	4.3	8.2	4.3	7.5	5.2	1.9	3.2	13.96	4.3	3.1	-0.831	Within-717-DEG flag; category unaffected
Gm37626	3 Strict Shared Down	8.1	2.2	3.1	2.6	2.4	3.7	2.6	1.98	3.1	13.49	2.6	5.4	-2.32	Within-717-DEG flag; category unaffected
REMAINING 56+ GENES (from full 16,626-gene set) — NOT SHOWN: These 56 additional outlier-influenced genes did not pass DEG thresholds (padj < 0.05, |log2FC| > 1.0) when HFD4052 was included, and are therefore 'Unclassified'. Full count data for these genes requires the complete normalized count matrix (not available in this file). They are annotated as Unclassified in Supplementary Table S1.
LEGEND
	CLASSIFIED: Gene entered the 9-category framework (5 genes: Saa1, Saa2, S100a8, Sult1e1, Lcn2) — assigned to Type 6 or Type 0b; category may be HFD4052-driven
	WITHIN-717 FLAG: Gene is in the 717 classified DEGs but also shows HFD4052 inflation — category assignment likely unaffected
	UNCLASSIFIED (not shown): Genes that passed outlier criteria but did NOT meet DEG thresholds — 65 additional genes

## Sheet: 5 Classified Outlier Genes
5 Outlier-Influenced Genes That Entered the 9-Category Classification (Interpret with Caution)
These 5 genes were assigned to classification categories based on DESeq2 estimates including HFD4052. Removal of HFD4052 would likely reclassify Saa1, Saa2, and S100a8 from Type 6 (Fat Specific Up) to Type 1 (Strict Shared Up). Sult1e1 and Lcn2 classification may also be affected.
Gene	Current Category	HFD_log2FC	HFD_padj	HFSD_log2FC	HFSD_padj	Median HFD4052 (outlier)	Median without HFD4052	z-score	Likely Reclassification
Saa1	6_Fat_Specific_Up	4.176	8.25e-4	2.323	0.097	36587	1200	1.79	Type 1 Strict Shared Up
Saa2	6_Fat_Specific_Up	4.586	7.56e-4	2.377	0.128	20755	900	2	Type 1 Strict Shared Up
S100a8	6_Fat_Specific_Up	2.8	1.01e-2	2.042	0.072	127	15	1.98	Type 1 Strict Shared Up
Sult1e1	6_Fat_Specific_Up	3.707	2.20e-2	3.125	0.055	53	15	1.9	Possibly Type 1 or Type 2
Lcn2	0b_Fructose_Suppressed	4.787	4.05e-6	3.879	2.33e-4	2074	300	1.99	Possibly Type 1 (both sig up, Delta change)
