# Supplementary material
Source: Research Square preprint supplement (doi:10.21203/rs.3.rs-9902298/v1)
Supplement: Supplementary file 4 [file da6a6ab29a376b8addda1e12.xlsx]

## Sheet: 16 CD-Zero Genes
CD-Zero Genes (n=16): Genes with Zero Expression in All CD Controls After Exclusion of Atp6-ps Artifact
Atp6-ps (excluded): Its apparent expression arose from stochastic multi-mapping of mt-Atp6 reads by Salmon. Evidence: HFD4049 had highest mt-Atp6 (44,934 counts) but Atp6-ps=0, ruling out transcriptional activation. Remaining 16 genes retain zero CD expression and are classified by detection consistency.
Gene	CD Median (counts)	HFD Median (counts)	HFSD Median (counts)	log2FC HFD vs CD	padj HFD vs CD	log2FC HFSD vs CD	padj HFSD vs CD	log2FC HFSD vs HFD	padj HFSD vs HFD	DEG Status	Classification & Annotation
BC035947	0	7.9	12.7	+5.29	1.21e-3	+5.88	1.20e-4	+0.58	NA	HFD+HFSD sig	Consistent (≥8/10 replicates) — biologically plausible
ENSMUSG141724	0	7.5	15	+4.63	1.03e-2	+6.04	1.69e-4	+1.41	NA	HFD+HFSD sig	Consistent (≥8/10 replicates) — biologically plausible
Gm2007	0	12.2	26.7	+6.78	7.39e-3	+7.15	3.12e-3	+0.37	0.977	HFD+HFSD sig	Consistent (≥8/10 replicates) — biologically plausible
Gm28661	0	765.4	573.4	+12.82	1.12e-11	+12.96	4.43e-12	+0.13	0.990	HFD+HFSD sig	Consistent (≥8/10 replicates) — biologically plausible
Gm44911	0	109.7	48.8	+8.96	1.47e-10	+7.98	1.67e-8	-0.98	0.293	HFD+HFSD sig	Sparse detection (≤6/10 replicates) — validation required
Gm50337	0	7.6	13.6	+5.39	8.63e-4	+6.29	2.69e-5	+0.90	NA	HFD+HFSD sig	Sparse detection (≤6/10 replicates) — validation required
Gm63949	0	87.1	48.6	+8.06	1.49e-2	+7.90	1.35e-2	-0.16	0.993	HFD+HFSD sig	Consistent (≥8/10 replicates) — biologically plausible
Mas1	0	15.3	9.3	+5.79	6.18e-4	+5.47	9.66e-4	-0.32	NA	HFD+HFSD sig	Consistent (≥8/10 replicates) — biologically plausible; known AT1-7 receptor
Scnn1g	0	5.5	11	+4.82	NA	+5.30	2.89e-3	+0.48	NA	HFSD sig only	Consistent (≥8/10 replicates) — biologically plausible
Sprr1a	0	2	11.8	+4.53	NA	+5.54	1.84e-3	+1.01	NA	HFSD sig only	Consistent (≥8/10 replicates) — biologically plausible; cornified envelope protein
Zfp968	0	34.8	136.6	+10.11	3.20e-2	+9.17	4.79e-2	-0.95	0.971	HFD+HFSD sig	Consistent (≥8/10 replicates) — biologically plausible
Gm20431	0	73.3	0	+8.74	5.07e-2	+7.62	8.65e-2	-1.12	0.965	Neither sig (padj>0.05)	Sparse/single-diet detection — HFD only; validation required
Gm23092	0	0	17.1	0.00	1.00	+6.64	2.89e-1	+6.65	NA	Neither sig	Sparse/single-diet detection — HFSD only; validation required
Gm43802	0	0	11.6	+5.39	1.78e-1	+5.36	1.59e-1	-0.03	NA	Neither sig	Sparse detection — validation required
Gm47924	0	0	22.3	+6.99	2.27e-1	+7.30	1.77e-1	+0.31	0.991	Neither sig	Sparse detection — validation required
Gm56487	0	18.2	0	+6.46	3.33e-1	0.00	1.00	-7.16	NA	Neither sig	Sparse/single-diet detection — HFD only; validation required
LEGEND
	Biologically plausible — consistent expression (>=8/10 HFD or HFSD replicates)
	Validation required — sparse detection (<=6/10 replicates)
	Validation required — detected in only one diet group (HFD or HFSD only)
